# Supplementary material for: LDLRAD3 is a receptor for Venezuelan equine encephalitis virus
Source: Springer Nature journal article supplement (doi:10.1038/s41586-020-2915-3), 2020-11-18
Supplement: MOESM4 [file 41586_2020_2915_MOESM4_ESM.xlsx]

## Sheet: Sheet1
id	num	neg|score	neg|p-value	neg|fdr	neg|rank	neg|goodsgrna	neg|lfc	pos|score	pos|p-value	pos|fdr	pos|rank	pos|goodsgrna	pos|lfc
Ldlrad3	5	0.76419	0.8701	0.999904	19140	1	-3.5991	8.0665e-08	2.2034e-07	0.00495	1	2	-3.5991
Ifltd1	4	0.11049	0.25298	0.97762	6053	2	-5.0875	1.891e-05	1.5203e-05	0.170792	2	1	-5.0875
Hpdl	5	0.99906	0.99908	0.999942	22442	0	-3.1682	7.091e-05	6.8965e-05	0.516502	3	1	-3.1682
mmu-mir-7231	4	0.45664	0.63771	0.999904	14833	1	-3.3438	0.00017018	0.0001809	0.659585	4	1	-3.3438
Tal1	6	0.051151	0.16571	0.953043	3376	3	-4.5666	0.00019854	0.00021262	0.659585	5	1	-4.5666
Tmsb10	3	0.73108	0.76596	0.999904	18744	1	-4.0373	0.00024108	0.00024567	0.659585	6	1	-4.0373
Dbndd2	5	0.22971	0.4567	0.997696	9865	2	-3.6276	0.00025998	0.00025757	0.659585	7	1	-3.6276
Ing1	6	0.13732	0.34431	0.989251	7052	4	-5.1013	0.00036869	0.00037215	0.659585	8	1	-5.1013
Nudt14	6	0.35287	0.62359	0.999904	12845	3	-4.794	0.0004254	0.00042855	0.659585	9	1	-4.794
Ap2a2	5	0.20673	0.43205	0.996612	9247	3	-5.1946	0.00059079	0.00058984	0.659585	10	0	-5.1946
Ace2	6	0.023522	0.090726	0.920454	1796	4	-5.6108	0.00059551	0.00059424	0.659585	11	0	-5.6108
Odam	5	0.064634	0.18416	0.955716	4057	4	-5.341	0.00063804	0.00063435	0.659585	12	0	-5.341
Oas1c	6	0.99842	0.99843	0.999942	22425	0	-2.9719	0.00065221	0.00064316	0.659585	13	0	-2.9719
Bpifb9b	3	0.90508	0.90522	0.999904	20811	0	-4.0857	0.00066642	0.00066872	0.659585	14	0	-4.0857
Aagab	5	0.37132	0.6019	0.999904	13225	2	-2.6031	0.00068529	0.00068458	0.659585	15	0	-2.6031
mmu-mir-331	4	0.9567	0.95666	0.999904	21539	0	-3.7047	0.00073728	0.00074187	0.659585	16	0	-3.7047
B4galt7	5	0.86814	0.91681	0.999904	20366	1	-3.7996	0.00077979	0.0007736	0.659585	17	0	-3.7996
Olfr323	6	0.39978	0.65846	0.999904	13758	3	-3.8426	0.00087899	0.00088465	0.659585	18	0	-3.8426
Spic	5	0.91634	0.93484	0.999904	20926	1	-3.7055	0.00096875	0.00094898	0.659585	19	0	-3.7055
Lzts3	6	0.12354	0.32326	0.985049	6535	3	-3.6292	0.00099236	0.000999	0.659585	20	0	-3.6292
Kcnj16	6	0.2111	0.44982	0.997696	9364	3	-4.944	0.001049	0.0010534	0.659585	21	0	-4.944
Kank1	5	0.1039	0.2633	0.980763	5771	4	-5.1484	0.0011577	0.0011376	0.659585	22	0	-5.1484
Trp53bp1	6	0.9565	0.96695	0.999904	21533	1	-2.4024	0.0012191	0.0012182	0.659585	23	0	-2.4024
Rhobtb2	6	0.079405	0.23437	0.971523	4731	4	-5.2636	0.0012757	0.0012777	0.659585	24	0	-5.2636
Snrpd1	2	0.95733	0.9575	0.999904	21550	0	-1.7117	0.0063436	0.0064036	0.659585	25	0	-1.7117
Gm3286	2	0.17064	0.2753	0.980763	8171	1	-3.2863	0.0063436	0.0064036	0.659585	26	0	-3.2863
Psmc2	2	0.72786	0.72834	0.999904	18700	1	-2.4854	0.0063436	0.0064036	0.659585	27	0	-2.4854
Nudt11	2	0.99833	0.99831	0.999942	22422	0	-0.50186	0.0063436	0.0064036	0.659585	28	0	-0.50186
NonTargetingControlGuideForMouse_0014	1	0.99201	0.99198	0.999904	22269	0	-0.31141	0.0079941	0.0079618	0.659585	29	0	-0.31141
Zcchc2	3	0.94032	0.94052	0.999904	21280	0	-3.0374	0.0095003	0.0094081	0.659585	30	0	-3.0374
Vipas39	3	0.65777	0.72535	0.999904	17895	1	-1.7356	0.0095003	0.0094081	0.659585	31	0	-1.7356
Edem2	3	0.030646	0.07661	0.909843	2266	2	-6.1665	0.0095003	0.0094081	0.659585	32	0	-6.1665
Anp32b	3	0.10219	0.22496	0.970961	5699	1	-4.5195	0.0095003	0.0094081	0.659585	33	0	-4.5195
Cdca7l	3	0.85084	0.85222	0.999904	20194	1	-1.7956	0.0095003	0.0094081	0.659585	34	0	-1.7956
Ttc39a	3	0.041492	0.10119	0.923785	2881	1	-1.8713	0.0095003	0.0094081	0.659585	35	0	-1.8713
Mtg1	3	0.74624	0.77529	0.999904	18944	1	-3.928	0.0095003	0.0094081	0.659585	36	0	-3.928
Mbtps2	3	0.96964	0.96977	0.999904	21770	0	-3.0821	0.0095003	0.0094081	0.659585	37	0	-3.0821
Saa2	3	0.94769	0.94792	0.999904	21393	0	-3.5241	0.0095003	0.0094081	0.659585	38	0	-3.5241
Arl8b	3	0.81621	0.82348	0.999904	19807	1	-3.9468	0.0095003	0.0094081	0.659585	39	0	-3.9468
Elof1	3	0.8907	0.89083	0.999904	20648	0	-3.2003	0.0095003	0.0094081	0.659585	40	0	-3.2003
Atp1a3	3	0.62712	0.71017	0.999904	17439	1	-3.301	0.0095003	0.0094081	0.659585	41	0	-3.301
Gm3259	3	0.93772	0.93791	0.999904	21230	0	-3.8373	0.0095003	0.0094081	0.659585	42	0	-3.8373
Zbtb8a	3	0.87488	0.87507	0.999904	20445	1	-3.9723	0.0095003	0.0094081	0.659585	43	0	-3.9723
Klra18	3	0.38479	0.5398	0.999904	13468	2	-4.6135	0.0095003	0.0094081	0.659585	44	0	-4.6135
Mipep	3	0.11113	0.24163	0.974059	6074	2	-5.6733	0.0095003	0.0094081	0.659585	45	0	-5.6733
Atp1b3	3	0.78005	0.79729	0.999904	19336	1	-3.019	0.0095003	0.0094081	0.659585	46	0	-3.019
Wdr37	3	0.37538	0.5303	0.999904	13305	2	-4.8889	0.0095003	0.0094081	0.659585	47	0	-4.8889
6820408C15Rik	3	0.74064	0.77182	0.999904	18867	1	-2.4129	0.0095003	0.0094081	0.659585	48	0	-2.4129
Ttc39b	3	0.80995	0.81865	0.999904	19734	1	-1.8731	0.0095003	0.0094081	0.659585	49	0	-1.8731
Olfr93	3	0.97276	0.97287	0.999904	21840	0	-2.137	0.0095003	0.0094081	0.659585	50	0	-2.137
Tex14	3	0.07813	0.17822	0.955335	4671	1	-3.9051	0.0095003	0.0094081	0.659585	51	0	-3.9051
Jam2	3	0.14158	0.28514	0.980763	7195	1	-4.0586	0.0095003	0.0094081	0.659585	52	0	-4.0586
Dcbld1	3	0.13124	0.27381	0.980763	6824	1	-4.4946	0.0095003	0.0094081	0.659585	53	0	-4.4946
Rps27	3	0.80995	0.81865	0.999904	19735	1	-3.9544	0.0095003	0.0094081	0.659585	54	0	-3.9544
Rpl39	3	0.92603	0.92612	0.999904	21060	0	-2.7481	0.0095003	0.0094081	0.659585	55	0	-2.7481
Nt5m	3	0.27426	0.4261	0.996612	11065	2	-4.7737	0.0095003	0.0094081	0.659585	56	0	-4.7737
Fitm1	4	0.038003	0.11365	0.931052	2689	1	-3.449	0.012647	0.012705	0.659585	57	0	-3.449
Uso1	4	0.017998	0.058038	0.899111	1453	2	-5.0036	0.012647	0.012705	0.659585	58	0	-5.0036
Gemin2	4	0.64586	0.78125	0.999904	17715	2	-4.1212	0.012647	0.012705	0.659585	59	0	-4.1212
Usp7	4	0.90483	0.90968	0.999904	20810	1	-2.6083	0.012647	0.012705	0.659585	60	0	-2.6083
Mettl13	4	0.88886	0.89874	0.999904	20630	1	-3.2235	0.012647	0.012705	0.659585	61	0	-3.2235
Hmmr	4	0.64715	0.78225	0.999904	17730	2	-4.6093	0.012647	0.012705	0.659585	62	0	-4.6093
Prss43	4	0.96247	0.96246	0.999904	21642	0	-3.8636	0.012647	0.012705	0.659585	63	0	-3.8636
Usp2	4	0.93394	0.93395	0.999904	21177	1	-2.5326	0.012647	0.012705	0.659585	64	0	-2.5326
Dnajc16	4	0.1227	0.27184	0.980763	6508	3	-5.3754	0.012647	0.012705	0.659585	65	0	-5.3754
4930578I06Rik	4	0.013302	0.043921	0.873275	1128	3	-5.7604	0.012647	0.012705	0.659585	66	0	-5.7604
Sox11	4	0.26162	0.469	0.997935	10749	2	-4.5574	0.012647	0.012705	0.659585	67	0	-4.5574
Cdc26	4	0.99077	0.9908	0.999904	22238	0	-1.8299	0.012647	0.012705	0.659585	68	0	-1.8299
Tex101	4	0.056779	0.16156	0.951222	3655	2	-4.8073	0.012647	0.012705	0.659585	69	0	-4.8073
Chrm2	4	0.59197	0.73932	0.999904	16913	2	-4.5229	0.012647	0.012705	0.659585	70	0	-4.5229
Txn1	4	0.33973	0.55327	0.999904	12598	1	-2.3552	0.012647	0.012705	0.659585	71	0	-2.3552
Cry2	4	0.22202	0.41567	0.994281	9667	3	-4.8699	0.012647	0.012705	0.659585	72	0	-4.8699
Oosp2	4	0.98026	0.98035	0.999904	21990	0	-3.2872	0.012647	0.012705	0.659585	73	0	-3.2872
Aen	4	0.34233	0.55516	0.999904	12653	2	-2.9437	0.012647	0.012705	0.659585	74	0	-2.9437
Dpysl2	4	0.074626	0.19556	0.959284	4508	3	-5.6122	0.012647	0.012705	0.659585	75	0	-5.6122
A530064D06Rik	4	0.39566	0.59352	0.999904	13674	2	-4.3984	0.012647	0.012705	0.659585	76	0	-4.3984
Tmem239	4	0.060073	0.16952	0.954222	3845	1	-2.0694	0.012647	0.012705	0.659585	77	0	-2.0694
Aknad1	4	0.3366	0.55104	0.999904	12537	2	-4.0964	0.012647	0.012705	0.659585	78	0	-4.0964
Chad	4	0.63232	0.77068	0.999904	17508	1	-3.3683	0.012647	0.012705	0.659585	79	0	-3.3683
Slc7a2	4	0.21081	0.40034	0.994281	9352	3	-5.091	0.012647	0.012705	0.659585	80	0	-5.091
Mrgprd	4	0.56346	0.71742	0.999904	16506	2	-4.3191	0.012647	0.012705	0.659585	81	0	-4.3191
Medag	4	0.50286	0.67198	0.999904	15646	2	-4.7056	0.012647	0.012705	0.659585	82	0	-4.7056
Zic5	4	0.98745	0.9875	0.999904	22159	0	-3.4497	0.012647	0.012705	0.659585	83	0	-3.4497
Hist1h4j	4	0.8289	0.86602	0.999904	19940	1	-3.5092	0.012647	0.012705	0.659585	84	0	-3.5092
Nucks1	4	0.19834	0.38283	0.992246	9008	3	-5.209	0.012647	0.012705	0.659585	85	0	-5.209
Hist1h4d	4	0.11864	0.26553	0.980763	6360	3	-4.7643	0.012647	0.012705	0.659585	86	0	-4.7643
Rad54l2	4	0.91348	0.91625	0.999904	20895	1	-3.4177	0.012647	0.012705	0.659585	87	0	-3.4177
Vmn1r11	4	0.1863	0.36575	0.991654	8691	2	-4.9151	0.012647	0.012705	0.659585	88	0	-4.9151
D14Abb1e	4	0.25629	0.46188	0.997696	10599	1	-4.0718	0.012647	0.012705	0.659585	89	0	-4.0718
Tm4sf20	4	0.06758	0.18395	0.955716	4196	2	-5.2112	0.012647	0.012705	0.659585	90	0	-5.2112
Ufsp1	4	0.21081	0.40034	0.994281	9351	3	-4.9013	0.012647	0.012705	0.659585	91	0	-4.9013
Mmp2	4	0.66211	0.79388	0.999904	17949	2	-4.5082	0.012647	0.012705	0.659585	92	0	-4.5082
Idh3b	4	0.97096	0.97096	0.999904	21788	0	-3.059	0.012647	0.012705	0.659585	93	0	-3.059
Vmn2r67	4	0.14314	0.3028	0.984117	7257	3	-5.3086	0.012647	0.012705	0.659585	94	0	-5.3086
Ermn	4	0.94368	0.94361	0.999904	21323	0	-3.7839	0.012647	0.012705	0.659585	95	0	-3.7839
Gpr155	4	0.56012	0.71494	0.999904	16462	2	-3.5829	0.012647	0.012705	0.659585	96	0	-3.5829
Rpl10a	4	0.13923	0.29699	0.983436	7116	1	-1.9423	0.012647	0.012705	0.659585	97	0	-1.9423
Spc25	4	0.30192	0.52056	0.999197	11740	1	-2.6345	0.012647	0.012705	0.659585	98	0	-2.6345
Tspan3	4	0.25182	0.45598	0.997696	10470	3	-4.8815	0.012647	0.012705	0.659585	99	0	-4.8815
Myg1	4	0.21284	0.40313	0.994281	9401	2	-3.8508	0.012647	0.012705	0.659585	100	0	-3.8508
4933416C03Rik	4	0.57293	0.7246	0.999904	16640	2	-4.3391	0.012647	0.012705	0.659585	101	0	-4.3391
Map2k7	4	0.69527	0.81616	0.999904	18336	1	-3.8282	0.012647	0.012705	0.659585	102	0	-3.8282
Ints9	4	0.93137	0.93155	0.999904	21138	1	-3.9596	0.012647	0.012705	0.659585	103	0	-3.9596
Derl3	4	0.10942	0.25128	0.976019	6011	2	-4.1756	0.012647	0.012705	0.659585	104	0	-4.1756
Rgs19	4	0.067156	0.18326	0.955716	4165	3	-5.753	0.012647	0.012705	0.659585	105	0	-5.753
Vmn1r57	4	0.44743	0.63095	0.999904	14649	2	-4.7061	0.012647	0.012705	0.659585	106	0	-4.7061
Ap3d1	4	0.94903	0.94892	0.999904	21415	0	-3.6308	0.012647	0.012705	0.659585	107	0	-3.6308
Zfp65	4	0.18326	0.3614	0.991654	8577	3	-5.312	0.012647	0.012705	0.659585	108	0	-5.312
Lmbr1l	4	0.28139	0.49464	0.999197	11236	3	-4.7441	0.012647	0.012705	0.659585	109	0	-4.7441
Mdh2	4	0.41168	0.60507	0.999904	13975	2	-4.4757	0.012647	0.012705	0.659585	110	0	-4.4757
Ppp3cc	4	0.020285	0.064657	0.90327	1590	1	-3.4769	0.012647	0.012705	0.659585	111	0	-3.4769
Gm10024	4	0.55459	0.71075	0.999904	16373	1	-3.3932	0.012647	0.012705	0.659585	112	0	-3.3932
Fpr3	4	0.36341	0.57028	0.999904	13055	2	-4.7903	0.012647	0.012705	0.659585	113	0	-4.7903
Onecut1	4	0.96782	0.96783	0.999904	21732	0	-4.169	0.012647	0.012705	0.659585	114	0	-4.169
Kif17	4	0.38724	0.58736	0.999904	13509	1	-3.2883	0.012647	0.012705	0.659585	115	0	-3.2883
Rps19bp1	4	0.9749	0.97499	0.999904	21892	0	-1.7954	0.012647	0.012705	0.659585	116	0	-1.7954
Olfr596	4	0.14241	0.30174	0.984117	7223	1	-1.7128	0.012647	0.012705	0.659585	117	0	-1.7128
Enkd1	4	0.78831	0.84845	0.999904	19438	1	-3.4243	0.012647	0.012705	0.659585	118	0	-3.4243
Nt5c1a	4	0.96118	0.96112	0.999904	21621	0	-2.9983	0.012647	0.012705	0.659585	119	0	-2.9983
Elmsan1	4	0.93995	0.93991	0.999904	21270	0	-3.6389	0.012647	0.012705	0.659585	120	0	-3.6389
Nrl	4	0.99945	0.99943	0.999942	22453	0	-1.7587	0.012647	0.012705	0.659585	121	0	-1.7587
Trdn	4	0.93279	0.93283	0.999904	21156	1	-3.9304	0.012647	0.012705	0.659585	122	0	-3.9304
Spata21	4	0.95536	0.95528	0.999904	21512	0	-3.9197	0.012647	0.012705	0.659585	123	0	-3.9197
Cbx2	4	0.97735	0.97751	0.999904	21937	0	-1.5966	0.012647	0.012705	0.659585	124	0	-1.5966
Zfp747	4	0.067381	0.18363	0.955716	4172	1	-2.9871	0.012647	0.012705	0.659585	125	0	-2.9871
Prpf8	4	0.88612	0.89696	0.999904	20593	1	-2.0921	0.012647	0.012705	0.659585	126	0	-2.0921
Racgap1	4	0.6627	0.79435	0.999904	17960	1	-3.3147	0.012647	0.012705	0.659585	127	0	-3.3147
Defb21	4	0.9331	0.93314	0.999904	21162	1	-3.9802	0.012647	0.012705	0.659585	128	0	-3.9802
Mafg	4	0.78525	0.84727	0.999904	19410	1	-4.3714	0.012647	0.012705	0.659585	129	0	-4.3714
Cebpa	4	0.3111	0.53213	0.999904	11964	2	-4.0955	0.012647	0.012705	0.659585	130	0	-4.0955
Slc7a9	4	0.15296	0.31741	0.984117	7567	2	-4.8687	0.012647	0.012705	0.659585	131	0	-4.8687
Ppih	4	0.058646	0.16603	0.953043	3759	1	-2.2495	0.012647	0.012705	0.659585	132	0	-2.2495
Serf1	4	0.97096	0.97096	0.999904	21790	0	-2.7049	0.012647	0.012705	0.659585	133	0	-2.7049
Olfr1330	4	0.5364	0.69707	0.999904	16116	1	-1.4823	0.012647	0.012705	0.659585	134	0	-1.4823
Ksr2	4	0.89073	0.89999	0.999904	20652	1	-3.4814	0.012647	0.012705	0.659585	135	0	-3.4814
Ric8	4	0.45419	0.63592	0.999904	14769	1	-4.0593	0.012647	0.012705	0.659585	136	0	-4.0593
Krt78	4	0.01602	0.052259	0.895031	1320	2	-3.8514	0.012647	0.012705	0.659585	137	0	-3.8514
Ndufa4	4	0.37891	0.5814	0.999904	13361	1	-2.4334	0.012647	0.012705	0.659585	138	0	-2.4334
Olfr39	4	0.76588	0.83982	0.999904	19162	1	-2.8182	0.012647	0.012705	0.659585	139	0	-2.8182
Wnt6	4	0.88378	0.8955	0.999904	20561	1	-3.0383	0.012647	0.012705	0.659585	140	0	-3.0383
Cnih2	4	0.62527	0.76522	0.999904	17412	2	-4.0575	0.012647	0.012705	0.659585	141	0	-4.0575
Aldoart1	4	0.27059	0.48067	0.999197	10975	2	-4.1652	0.012647	0.012705	0.659585	142	0	-4.1652
Zfp9	4	0.96188	0.96186	0.999904	21634	0	-3.4418	0.012647	0.012705	0.659585	143	0	-3.4418
Kcna10	4	0.053612	0.15375	0.950325	3500	3	-5.6701	0.012647	0.012705	0.659585	144	0	-5.6701
Gm11568	4	0.46767	0.64588	0.999904	15021	2	-3.3743	0.012647	0.012705	0.659585	145	0	-3.3743
Oas3	4	0.80163	0.8539	0.999904	19617	1	-3.3828	0.012647	0.012705	0.659585	146	0	-3.3828
Pik3r6	4	0.13837	0.29569	0.983436	7086	1	-3.0968	0.012647	0.012705	0.659585	147	0	-3.0968
Pabpc2	4	0.99902	0.99902	0.999942	22440	0	-1.6218	0.012647	0.012705	0.659585	148	0	-1.6218
Psma5	4	0.35063	0.56111	0.999904	12803	2	-3.2632	0.012647	0.012705	0.659585	149	0	-3.2632
Fam20a	4	0.79791	0.85235	0.999904	19563	1	-3.0393	0.012647	0.012705	0.659585	150	0	-3.0393
Fbxl12	4	0.92727	0.92784	0.999904	21078	1	-2.826	0.012647	0.012705	0.659585	151	0	-2.826
Kctd3	4	0.23768	0.43701	0.996612	10093	1	-3.4753	0.012647	0.012705	0.659585	152	0	-3.4753
Tiam2	4	0.84824	0.87537	0.999904	20162	1	-4.2803	0.012647	0.012705	0.659585	153	0	-4.2803
Rdm1	4	0.50829	0.67603	0.999904	15715	2	-3.1492	0.012647	0.012705	0.659585	154	0	-3.1492
C87977	4	0.63119	0.76979	0.999904	17494	1	-2.6695	0.012647	0.012705	0.659585	155	0	-2.6695
Sh3pxd2b	4	0.97096	0.97096	0.999904	21789	0	-0.50277	0.012647	0.012705	0.659585	156	0	-0.50277
Tbca	4	0.55547	0.71141	0.999904	16395	1	-1.9243	0.012647	0.012705	0.659585	157	0	-1.9243
4933402N03Rik	4	0.65307	0.78683	0.999904	17822	1	-4.2365	0.012647	0.012705	0.659585	158	0	-4.2365
Cntnap1	4	0.49831	0.66857	0.999904	15576	2	-4.3667	0.012647	0.012705	0.659585	159	0	-4.3667
Cenpe	4	0.73098	0.82741	0.999904	18742	1	-3.7423	0.012647	0.012705	0.659585	160	0	-3.7423
Slc9a2	4	0.47538	0.65156	0.999904	15158	2	-4.7932	0.012647	0.012705	0.659585	161	0	-4.7932
Zbtb32	4	0.1432	0.30289	0.984117	7258	3	-5.1024	0.012647	0.012705	0.659585	162	0	-5.1024
Bub1b	5	0.70389	0.83348	0.999904	18435	2	-4.35	0.015784	0.015787	0.659585	163	0	-4.35
Vmn2r112	5	0.97532	0.9754	0.999904	21899	0	-4.2206	0.015784	0.015787	0.659585	164	0	-4.2206
Sorbs2	5	0.16351	0.37111	0.991654	7930	4	-4.7708	0.015784	0.015787	0.659585	165	0	-4.7708
BC049730	5	0.7356	0.85237	0.999904	18812	2	-4.079	0.015784	0.015787	0.659585	166	0	-4.079
Dact2	5	0.83126	0.90625	0.999904	19963	1	-0.38841	0.015784	0.015787	0.659585	167	0	-0.38841
Zbtb7b	5	0.9288	0.94099	0.999904	21099	1	-3.8049	0.015784	0.015787	0.659585	168	0	-3.8049
Olfr943	5	0.39898	0.62895	0.999904	13738	3	-4.6135	0.015784	0.015787	0.659585	169	0	-4.6135
Ocm	5	0.8579	0.91364	0.999904	20262	1	-3.9317	0.015784	0.015787	0.659585	170	0	-3.9317
Bnip1	5	0.64177	0.79802	0.999904	17662	2	-4.4396	0.015784	0.015787	0.659585	171	0	-4.4396
Acsl4	5	0.15955	0.36431	0.991654	7806	3	-5.3193	0.015784	0.015787	0.659585	172	0	-5.3193
Mbd4	5	0.49492	0.71881	0.999904	15502	3	-4.5837	0.015784	0.015787	0.659585	173	0	-4.5837
Cxcl12	5	0.11256	0.27985	0.980763	6123	4	-5.4356	0.015784	0.015787	0.659585	174	0	-5.4356
Dock1	5	0.97468	0.97475	0.999904	21884	0	-2.8161	0.015784	0.015787	0.659585	175	0	-2.8161
Fam166a	5	0.71569	0.84044	0.999904	18569	1	-2.9	0.015784	0.015787	0.659585	176	0	-2.9
Zc3hc1	5	0.47962	0.70476	0.999904	15226	2	-3.6931	0.015784	0.015787	0.659585	177	0	-3.6931
Gm5082	5	0.071538	0.19855	0.959445	4393	3	-5.3905	0.015784	0.015787	0.659585	178	0	-5.3905
Numb	5	0.97488	0.97495	0.999904	21889	0	-3.9368	0.015784	0.015787	0.659585	179	0	-3.9368
Bloc1s1	5	0.95964	0.96071	0.999904	21601	1	-2.8057	0.015784	0.015787	0.659585	180	0	-2.8057
Vwa2	5	0.47167	0.69741	0.999904	15094	2	-3.1682	0.015784	0.015787	0.659585	181	0	-3.1682
Rpa3	5	0.52104	0.73407	0.999904	15889	2	-2.5834	0.015784	0.015787	0.659585	182	0	-2.5834
Maged1	5	0.47098	0.69678	0.999904	15081	3	-4.6352	0.015784	0.015787	0.659585	183	0	-4.6352
Usp18	5	0.42098	0.65	0.999904	14173	3	-4.7351	0.015784	0.015787	0.659585	184	0	-4.7351
Ash1l	5	0.53488	0.74111	0.999904	16094	2	-4.5217	0.015784	0.015787	0.659585	185	0	-4.5217
Olfr510	5	0.43698	0.6651	0.999904	14453	2	-4.5579	0.015784	0.015787	0.659585	186	0	-4.5579
Matk	5	0.44168	0.66946	0.999904	14547	1	-4.0834	0.015784	0.015787	0.659585	187	0	-4.0834
Ints7	5	0.99479	0.99479	0.999904	22349	0	-1.2213	0.015784	0.015787	0.659585	188	0	-1.2213
S100a5	5	0.30708	0.53758	0.999904	11863	2	-2.0814	0.015784	0.015787	0.659585	189	0	-2.0814
Dstyk	5	0.55572	0.75192	0.999904	16397	1	-3.0322	0.015784	0.015787	0.659585	190	0	-3.0322
H2-M11	5	0.17891	0.39699	0.994281	8444	4	-5.0463	0.015784	0.015787	0.659585	191	0	-5.0463
Lrrtm4	5	0.12048	0.29452	0.983087	6427	2	-4.3331	0.015784	0.015787	0.659585	192	0	-4.3331
Fam173a	5	0.97345	0.9735	0.999904	21856	0	-4.2213	0.015784	0.015787	0.659585	193	0	-4.2213
Arid5a	5	0.32458	0.55535	0.999904	12272	1	-2.7803	0.015784	0.015787	0.659585	194	0	-2.7803
Nrarp	5	0.55426	0.75114	0.999904	16371	1	-3.3161	0.015784	0.015787	0.659585	195	0	-3.3161
Olfr1134	5	0.093761	0.24363	0.974233	5339	3	-5.5365	0.015784	0.015787	0.659585	196	0	-5.5365
Ehd1	5	0.32034	0.55105	0.999904	12182	3	-4.9089	0.015784	0.015787	0.659585	197	0	-4.9089
Slamf7	5	0.10359	0.26269	0.980763	5759	4	-5.2114	0.015784	0.015787	0.659585	198	0	-5.2114
Cirh1a	5	0.99662	0.99661	0.999942	22386	0	-1.4257	0.015784	0.015787	0.659585	199	0	-1.4257
Nr1h2	5	0.85934	0.91407	0.999904	20271	1	-4.2593	0.015784	0.015787	0.659585	200	0	-4.2593
Defb11	5	0.15866	0.36276	0.991654	7777	2	-4.3108	0.015784	0.015787	0.659585	201	0	-4.3108
Prdm6	5	0.29093	0.521	0.999197	11480	2	-4.0666	0.015784	0.015787	0.659585	202	0	-4.0666
Krtap11-1	5	0.20809	0.43352	0.996612	9286	3	-5.191	0.015784	0.015787	0.659585	203	0	-5.191
Nqo1	5	0.40538	0.63511	0.999904	13867	3	-4.7688	0.015784	0.015787	0.659585	204	0	-4.7688
Icam2	5	0.15414	0.355	0.990472	7615	2	-3.2237	0.015784	0.015787	0.659585	205	0	-3.2237
BC049352	5	0.18947	0.41328	0.994281	8788	3	-5.239	0.015784	0.015787	0.659585	206	0	-5.239
Zbed6	5	0.40032	0.63023	0.999904	13763	3	-4.7737	0.015784	0.015787	0.659585	207	0	-4.7737
Prrxl1	5	0.95827	0.9596	0.999904	21575	1	-1.7956	0.015784	0.015787	0.659585	208	0	-1.7956
Igsf8	5	0.12048	0.29452	0.983087	6426	4	-5.0997	0.015784	0.015787	0.659585	209	0	-5.0997
Capn10	5	0.36614	0.59677	0.999904	13111	1	-2.6614	0.015784	0.015787	0.659585	210	0	-2.6614
Acbd5	5	0.90353	0.92933	0.999904	20795	1	-3.2706	0.015784	0.015787	0.659585	211	0	-3.2706
Olfr890	5	0.23453	0.46186	0.997696	9998	3	-4.9524	0.015784	0.015787	0.659585	212	0	-4.9524
Fam134c	5	0.061224	0.17697	0.954222	3905	2	-4.1412	0.015784	0.015787	0.659585	213	0	-4.1412
Slit1	5	0.57595	0.76237	0.999904	16673	2	-4.5425	0.015784	0.015787	0.659585	214	0	-4.5425
Rgs11	5	0.1147	0.28387	0.980763	6210	3	-5.1216	0.015784	0.015787	0.659585	215	0	-5.1216
Sh3pxd2a	5	0.93455	0.94406	0.999904	21184	1	-3.2292	0.015784	0.015787	0.659585	216	0	-3.2292
Trub1	5	0.99493	0.99492	0.999904	22351	0	-3.5241	0.015784	0.015787	0.659585	217	0	-3.5241
Afg3l1	5	0.43164	0.6601	0.999904	14368	3	-4.717	0.015784	0.015787	0.659585	218	0	-4.717
Dnajb9	5	0.42123	0.65024	0.999904	14183	2	-4.2881	0.015784	0.015787	0.659585	219	0	-4.2881
Lrp3	5	0.052825	0.15879	0.95069	3451	2	-3.9561	0.015784	0.015787	0.659585	220	0	-3.9561
Fam174b	5	0.16179	0.36817	0.991654	7873	3	-5.3138	0.015784	0.015787	0.659585	221	0	-5.3138
Gm590	5	0.78524	0.8836	0.999904	19405	2	-3.3161	0.015784	0.015787	0.659585	222	0	-3.3161
Hps6	5	0.23333	0.46058	0.997696	9961	1	-3.3161	0.015784	0.015787	0.659585	223	0	-3.3161
Slc22a7	5	0.13888	0.32807	0.985705	7102	2	-3.4029	0.015784	0.015787	0.659585	224	0	-3.4029
Ube2g2	5	0.066493	0.18799	0.955716	4134	2	-4.3979	0.015784	0.015787	0.659585	225	0	-4.3979
Depdc1b	5	0.12516	0.30312	0.984117	6589	3	-5.4244	0.015784	0.015787	0.659585	226	0	-5.4244
Npr2	5	0.23516	0.46253	0.997696	10017	2	-3.4848	0.015784	0.015787	0.659585	227	0	-3.4848
Rrs1	5	0.98637	0.98638	0.999904	22126	0	-3.4476	0.015784	0.015787	0.659585	228	0	-3.4476
Akr1c13	5	0.63558	0.79461	0.999904	17566	1	-3.8255	0.015784	0.015787	0.659585	229	0	-3.8255
4930444P10Rik	5	0.12836	0.30895	0.984117	6709	3	-5.1181	0.015784	0.015787	0.659585	230	0	-5.1181
BC024978	5	0.45546	0.68234	0.999904	14809	3	-4.6672	0.015784	0.015787	0.659585	231	0	-4.6672
Pcdhb6	5	0.017876	0.067284	0.906307	1446	3	-6.0279	0.015784	0.015787	0.659585	232	0	-6.0279
Reg1	5	0.075842	0.20752	0.965372	4567	3	-5.5321	0.015784	0.015787	0.659585	233	0	-5.5321
Sec61g	5	0.31343	0.5441	0.999904	12021	2	-4.1306	0.015784	0.015787	0.659585	234	0	-4.1306
Trpv6	5	0.33549	0.56636	0.999904	12505	1	-1.5128	0.015784	0.015787	0.659585	235	0	-1.5128
Elp5	5	0.78425	0.88298	0.999904	19394	2	-4.1939	0.015784	0.015787	0.659585	236	0	-4.1939
Kcnc4	5	0.13391	0.31907	0.984117	6933	4	-5.3142	0.015784	0.015787	0.659585	237	0	-5.3142
Tlx3	5	0.55929	0.75377	0.999904	16447	1	-4.3144	0.015784	0.015787	0.659585	238	0	-4.3144
Oxnad1	5	0.72015	0.84304	0.999904	18619	1	-4.3496	0.015784	0.015787	0.659585	239	0	-4.3496
Chrd	5	0.92953	0.94137	0.999904	21111	1	-3.9767	0.015784	0.015787	0.659585	240	0	-3.9767
Mib1	5	0.57112	0.75984	0.999904	16611	1	-1.2901	0.015784	0.015787	0.659585	241	0	-1.2901
Trib2	5	0.73849	0.85413	0.999904	18840	2	-3.5426	0.015784	0.015787	0.659585	242	0	-3.5426
Disc1	5	0.63015	0.79161	0.999904	17480	1	-3.162	0.015784	0.015787	0.659585	243	0	-3.162
Lgals8	5	0.51291	0.72998	0.999904	15781	1	-1.994	0.015784	0.015787	0.659585	244	0	-1.994
Ccar2	5	0.11922	0.29222	0.981574	6383	3	-5.2964	0.015784	0.015787	0.659585	245	0	-5.2964
Prss38	5	0.24431	0.47221	0.998472	10275	3	-5.0131	0.015784	0.015787	0.659585	246	0	-5.0131
Qprt	5	0.60621	0.77859	0.999904	17130	1	-1.7956	0.015784	0.015787	0.659585	247	0	-1.7956
Col1a2	5	0.46715	0.69324	0.999904	15009	2	-3.5241	0.015784	0.015787	0.659585	248	0	-3.5241
Scarf1	5	0.66617	0.8117	0.999904	17995	1	-2.0468	0.015784	0.015787	0.659585	249	0	-2.0468
Clic5	5	0.16733	0.37759	0.991903	8058	3	-5.2787	0.015784	0.015787	0.659585	250	0	-5.2787
Hoxa2	5	0.9462	0.95098	0.999904	21364	1	-3.4029	0.015784	0.015787	0.659585	251	0	-3.4029
Aacs	5	0.13228	0.31604	0.984117	6862	2	-3.8727	0.015784	0.015787	0.659585	252	0	-3.8727
Nup50	5	0.11359	0.28178	0.980763	6159	3	-5.1681	0.015784	0.015787	0.659585	253	0	-5.1681
Rims2	5	0.4073	0.63695	0.999904	13905	2	-4.4568	0.015784	0.015787	0.659585	254	0	-4.4568
Vamp8	5	0.2349	0.46226	0.997696	10012	3	-4.7997	0.015784	0.015787	0.659585	255	0	-4.7997
Pls3	5	0.8091	0.89939	0.999904	19719	2	-4.218	0.015784	0.015787	0.659585	256	0	-4.218
Olfr1033	5	0.56668	0.75762	0.999904	16546	2	-3.2237	0.015784	0.015787	0.659585	257	0	-3.2237
Dnajc10	5	0.12879	0.30973	0.984117	6729	4	-4.9051	0.015784	0.015787	0.659585	258	0	-4.9051
Mertk	5	0.82976	0.90586	0.999904	19951	1	-4.2959	0.015784	0.015787	0.659585	259	0	-4.2959
Olfr38	5	0.12874	0.30964	0.984117	6725	1	-3.4029	0.015784	0.015787	0.659585	260	0	-3.4029
Gm15104	5	0.88083	0.92094	0.999904	20522	1	-4.46	0.015784	0.015787	0.659585	261	0	-4.46
Ero1l	5	0.52151	0.73432	0.999904	15894	2	-3.9698	0.015784	0.015787	0.659585	262	0	-3.9698
Morn5	5	0.61589	0.78381	0.999904	17269	2	-3.1752	0.015784	0.015787	0.659585	263	0	-3.1752
Angptl7	5	0.97481	0.97488	0.999904	21887	0	-3.8975	0.015784	0.015787	0.659585	264	0	-3.8975
Zfp36	5	0.10772	0.27066	0.980763	5945	3	-4.6495	0.015784	0.015787	0.659585	265	0	-4.6495
Spry1	5	0.70805	0.83596	0.999904	18475	2	-2.6372	0.015784	0.015787	0.659585	266	0	-2.6372
Olfr832	5	0.012348	0.047998	0.881168	1062	2	-4.2461	0.015784	0.015787	0.659585	267	0	-4.2461
Pms2	5	0.33228	0.56315	0.999904	12444	2	-4.413	0.015784	0.015787	0.659585	268	0	-4.413
Rab17	5	0.30112	0.53148	0.999904	11723	3	-4.9812	0.015784	0.015787	0.659585	269	0	-4.9812
Pias3	5	0.7745	0.8767	0.999904	19273	1	-0.56739	0.015784	0.015787	0.659585	270	0	-0.56739
Clca6	5	0.97773	0.97782	0.999904	21945	0	-3.6612	0.015784	0.015787	0.659585	271	0	-3.6612
1700003E16Rik	5	0.65588	0.8059	0.999904	17865	2	-4.344	0.015784	0.015787	0.659585	272	0	-4.344
Ddx4	5	0.99157	0.99161	0.999904	22260	0	-2.6614	0.015784	0.015787	0.659585	273	0	-2.6614
Ctnna3	5	0.0063423	0.026009	0.859951	562	1	-4.4187	0.015784	0.015787	0.659585	274	0	-4.4187
Bscl2	5	0.64814	0.80153	0.999904	17742	2	-4.124	0.015784	0.015787	0.659585	275	0	-4.124
Trnau1ap	5	0.97092	0.97098	0.999904	21787	0	-3.1752	0.015784	0.015787	0.659585	276	0	-3.1752
BC094916	5	0.70097	0.83177	0.999904	18401	2	-4.4248	0.015784	0.015787	0.659585	277	0	-4.4248
Myo15	5	0.6601	0.80827	0.999904	17918	2	-4.5316	0.015784	0.015787	0.659585	278	0	-4.5316
Tnk2	5	0.42536	0.6542	0.999904	14265	3	-4.73	0.015784	0.015787	0.659585	279	0	-4.73
Dna2	5	0.54317	0.7454	0.999904	16218	2	-3.2418	0.015784	0.015787	0.659585	280	0	-3.2418
Ptprn	5	0.21811	0.44426	0.997696	9560	3	-5.0426	0.015784	0.015787	0.659585	281	0	-5.0426
Myl6b	5	0.28609	0.51598	0.999197	11349	1	-3.7319	0.015784	0.015787	0.659585	282	0	-3.7319
Hsd11b2	5	0.58282	0.76598	0.999904	16783	2	-3.7996	0.015784	0.015787	0.659585	283	0	-3.7996
Fermt1	5	0.41575	0.64501	0.999904	14066	3	-4.5773	0.015784	0.015787	0.659585	284	0	-4.5773
Gusb	5	0.1451	0.33909	0.987001	7329	4	-4.7351	0.015784	0.015787	0.659585	285	0	-4.7351
Aldh1a1	5	0.82002	0.90344	0.999904	19849	1	-3.683	0.015784	0.015787	0.659585	286	0	-3.683
Tbc1d19	5	0.65338	0.80447	0.999904	17828	1	-3.4133	0.015784	0.015787	0.659585	287	0	-3.4133
Arhgef10l	5	0.83961	0.90842	0.999904	20063	1	-1.9602	0.015784	0.015787	0.659585	288	0	-1.9602
Synpo2l	5	0.72029	0.84314	0.999904	18623	2	-3.8727	0.015784	0.015787	0.659585	289	0	-3.8727
Six3	5	0.98736	0.98733	0.999904	22157	0	-4.0369	0.015784	0.015787	0.659585	290	0	-4.0369
Zfp740	5	0.87835	0.92009	0.999904	20498	1	-3.8364	0.015784	0.015787	0.659585	291	0	-3.8364
Kera	5	0.35719	0.58792	0.999904	12942	3	-4.8637	0.015784	0.015787	0.659585	292	0	-4.8637
Sag	5	0.01319	0.050961	0.885592	1116	2	-2.6372	0.015784	0.015787	0.659585	293	0	-2.6372
Fkbp5	5	0.15	0.34775	0.98953	7484	4	-4.937	0.015784	0.015787	0.659585	294	0	-4.937
Fbxw17	5	0.74355	0.85722	0.999904	18911	2	-1.4286	0.015784	0.015787	0.659585	295	0	-1.4286
Stxbp5	5	0.10892	0.27294	0.980763	5993	3	-4.8701	0.015784	0.015787	0.659585	296	0	-4.8701
Ccl2	5	0.8001	0.89334	0.999904	19595	2	-4.355	0.015784	0.015787	0.659585	297	0	-4.355
Hdac3	5	0.38484	0.61519	0.999904	13471	2	-3.9846	0.015784	0.015787	0.659585	298	0	-3.9846
Dusp6	5	0.11345	0.28151	0.980763	6151	4	-5.4144	0.015784	0.015787	0.659585	299	0	-5.4144
Lrrc15	5	0.30316	0.53362	0.999904	11770	3	-4.9752	0.015784	0.015787	0.659585	300	0	-4.9752
Mamdc4	5	0.1557	0.35769	0.991654	7664	3	-5.2243	0.015784	0.015787	0.659585	301	0	-5.2243
Kcnt2	5	0.088826	0.23392	0.971523	5127	2	-4.0994	0.015784	0.015787	0.659585	302	0	-4.0994
Kif1a	5	0.76614	0.87133	0.999904	19167	2	-3.8975	0.015784	0.015787	0.659585	303	0	-3.8975
Jun	5	0.27546	0.50498	0.999197	11094	3	-5.0143	0.015784	0.015787	0.659585	304	0	-5.0143
Otol1	5	0.45558	0.68244	0.999904	14813	2	-3.1752	0.015784	0.015787	0.659585	305	0	-3.1752
Eltd1	5	0.19026	0.41415	0.994281	8810	3	-5.238	0.015784	0.015787	0.659585	306	0	-5.238
Rpgrip1l	5	0.17512	0.39069	0.993916	8323	3	-5.2654	0.015784	0.015787	0.659585	307	0	-5.2654
Fgf14	5	0.091719	0.23962	0.97285	5253	2	-4.2392	0.015784	0.015787	0.659585	308	0	-4.2392
Aqp9	5	0.9284	0.94078	0.999904	21093	1	-1.5797	0.015784	0.015787	0.659585	309	0	-1.5797
Slc38a6	5	0.1939	0.41808	0.994281	8895	1	-2.937	0.015784	0.015787	0.659585	310	0	-2.937
Smndc1	5	0.69657	0.82921	0.999904	18354	1	-2.937	0.015784	0.015787	0.659585	311	0	-2.937
Fam92b	5	0.20883	0.43433	0.996612	9304	3	-5.191	0.015784	0.015787	0.659585	312	0	-5.191
Klk13	5	0.41455	0.64387	0.999904	14040	1	-2.8438	0.015784	0.015787	0.659585	313	0	-2.8438
Erp44	5	0.082369	0.22094	0.967265	4872	4	-5.5838	0.015784	0.015787	0.659585	314	0	-5.5838
Napa	5	0.97614	0.97622	0.999904	21914	0	-1.5837	0.015784	0.015787	0.659585	315	0	-1.5837
Cyp2j6	5	0.36309	0.5938	0.999904	13047	2	-4.0204	0.015784	0.015787	0.659585	316	0	-4.0204
Slc36a2	5	0.35754	0.58829	0.999904	12946	2	-3.7708	0.015784	0.015787	0.659585	317	0	-3.7708
Asxl2	5	0.41494	0.64425	0.999904	14052	3	-4.7475	0.015784	0.015787	0.659585	318	0	-4.7475
Ddo	5	0.95088	0.95411	0.999904	21438	1	-3.3148	0.015784	0.015787	0.659585	319	0	-3.3148
Gm21637	5	0.55105	0.74945	0.999904	16329	2	-2.353	0.015784	0.015787	0.659585	320	0	-2.353
Dgat1	5	0.97272	0.97278	0.999904	21838	0	-3.1629	0.015784	0.015787	0.659585	321	0	-3.1629
Mboat1	5	0.23703	0.46454	0.997696	10068	1	-3.9723	0.015784	0.015787	0.659585	322	0	-3.9723
Tox3	5	0.30639	0.53689	0.999904	11843	3	-4.6789	0.015784	0.015787	0.659585	323	0	-4.6789
Pex3	5	0.14666	0.34182	0.989156	7376	3	-5.1821	0.015784	0.015787	0.659585	324	0	-5.1821
Lig1	5	0.93624	0.94503	0.999904	21205	1	-2.0814	0.015784	0.015787	0.659585	325	0	-2.0814
Kcna2	5	0.93718	0.94554	0.999904	21219	1	-3.3822	0.015784	0.015787	0.659585	326	0	-3.3822
2010300C02Rik	5	0.31186	0.5425	0.999904	11976	1	-3.8995	0.015784	0.015787	0.659585	327	0	-3.8995
Spag7	5	0.54237	0.74497	0.999904	16208	2	-4.2019	0.015784	0.015787	0.659585	328	0	-4.2019
Ranbp10	5	0.29059	0.52063	0.999197	11475	2	-4.1885	0.015784	0.015787	0.659585	329	0	-4.1885
Hace1	5	0.24891	0.47713	0.99907	10392	3	-4.8561	0.015784	0.015787	0.659585	330	0	-4.8561
Focad	5	0.61556	0.78363	0.999904	17266	2	-3.4792	0.015784	0.015787	0.659585	331	0	-3.4792
Rdh9	5	0.12478	0.30241	0.984117	6572	2	-4.3979	0.015784	0.015787	0.659585	332	0	-4.3979
Socs1	5	0.71187	0.83821	0.999904	18519	2	-3.7708	0.015784	0.015787	0.659585	333	0	-3.7708
Olfr1309	5	0.25872	0.48738	0.999197	10656	3	-5.0714	0.015784	0.015787	0.659585	334	0	-5.0714
Esp34	5	0.18384	0.40517	0.994281	8599	2	-2.7617	0.015784	0.015787	0.659585	335	0	-2.7617
Rasef	5	0.9273	0.9402	0.999904	21080	1	-3.7708	0.015784	0.015787	0.659585	336	0	-3.7708
Alg12	5	0.50836	0.72766	0.999904	15719	2	-3.3675	0.015784	0.015787	0.659585	337	0	-3.3675
Ccdc105	5	0.58764	0.76856	0.999904	16853	2	-3.7396	0.015784	0.015787	0.659585	338	0	-3.7396
Olfr1462	5	0.31597	0.54675	0.999904	12077	2	-3.2706	0.015784	0.015787	0.659585	339	0	-3.2706
Pyhin1	5	0.66783	0.81263	0.999904	18019	2	-2.7354	0.015784	0.015787	0.659585	340	0	-2.7354
Cand1	5	0.23954	0.46712	0.997935	10141	3	-5.1158	0.015784	0.015787	0.659585	341	0	-5.1158
Zfp157	5	0.99001	0.99005	0.999904	22224	0	-3.67	0.015784	0.015787	0.659585	342	0	-3.67
Iqck	5	0.99738	0.99738	0.999942	22400	0	-1.4544	0.015784	0.015787	0.659585	343	0	-1.4544
Ndufa12	5	0.33011	0.56094	0.999904	12383	2	-3.4664	0.015784	0.015787	0.659585	344	0	-3.4664
Dtd2	5	0.22844	0.45537	0.997696	9828	3	-4.7974	0.015784	0.015787	0.659585	345	0	-4.7974
Spire1	5	0.36894	0.59954	0.999904	13176	2	-4.4636	0.015784	0.015787	0.659585	346	0	-4.4636
Il34	5	0.72029	0.84314	0.999904	18622	2	-4.2461	0.015784	0.015787	0.659585	347	0	-4.2461
Foxj2	5	0.07708	0.21005	0.965372	4622	2	-4.2593	0.015784	0.015787	0.659585	348	0	-4.2593
Vwa7	5	0.70695	0.83528	0.999904	18465	2	-3.0572	0.015784	0.015787	0.659585	349	0	-3.0572
Rnf187	5	0.22718	0.45402	0.997696	9799	2	-4.2802	0.015784	0.015787	0.659585	350	0	-4.2802
2010001E11Rik	5	0.17136	0.38442	0.992246	8194	2	-3.6276	0.015784	0.015787	0.659585	351	0	-3.6276
Bean1	5	0.66192	0.8093	0.999904	17946	2	-4.4681	0.015784	0.015787	0.659585	352	0	-4.4681
Manea	5	0.48409	0.70892	0.999904	15317	2	-4.0702	0.015784	0.015787	0.659585	353	0	-4.0702
Ldlrad1	5	0.80111	0.89401	0.999904	19605	1	-2.2209	0.015784	0.015787	0.659585	354	0	-2.2209
Phkb	5	0.052384	0.15786	0.95069	3436	4	-5.4132	0.015784	0.015787	0.659585	355	0	-5.4132
Gm715	5	0.70074	0.83164	0.999904	18396	2	-3.1752	0.015784	0.015787	0.659585	356	0	-3.1752
Gm5591	5	0.0039058	0.016397	0.816453	367	4	-6.1073	0.015784	0.015787	0.659585	357	0	-6.1073
Arpc1a	5	0.045597	0.14297	0.943457	3101	4	-5.4681	0.015784	0.015787	0.659585	358	0	-5.4681
Cst3	5	0.47449	0.70001	0.999904	15147	2	-3.7099	0.015784	0.015787	0.659585	359	0	-3.7099
Dnajc18	5	0.7143	0.83962	0.999904	18550	2	-4.5425	0.015784	0.015787	0.659585	360	0	-4.5425
Cldn6	5	0.55499	0.75152	0.999904	16375	2	-3.0729	0.015784	0.015787	0.659585	361	0	-3.0729
Dgke	5	0.92625	0.93967	0.999904	21064	1	-2.6444	0.015784	0.015787	0.659585	362	0	-2.6444
Dot1l	5	0.71911	0.84245	0.999904	18608	2	-3.7099	0.015784	0.015787	0.659585	363	0	-3.7099
Samd8	5	0.88341	0.92184	0.999904	20554	1	-3.9987	0.015784	0.015787	0.659585	364	0	-3.9987
Ccdc173	5	0.54644	0.74706	0.999904	16255	2	-4.0369	0.015784	0.015787	0.659585	365	0	-4.0369
Cd1d1	5	0.24055	0.46819	0.997935	10173	3	-5.1136	0.015784	0.015787	0.659585	366	0	-5.1136
Hspb6	5	0.51591	0.73146	0.999904	15820	2	-1.8017	0.015784	0.015787	0.659585	367	0	-1.8017
Olfr1188	5	0.724	0.84536	0.999904	18657	1	-4.355	0.015784	0.015787	0.659585	368	0	-4.355
Olfr1477	5	0.46232	0.68874	0.999904	14917	2	-3.8727	0.015784	0.015787	0.659585	369	0	-3.8727
Pck2	5	0.96274	0.96335	0.999904	21654	1	-2.4529	0.015784	0.015787	0.659585	370	0	-2.4529
Cd248	5	0.55105	0.74945	0.999904	16327	2	-2.9629	0.015784	0.015787	0.659585	371	0	-2.9629
Pex26	5	0.9462	0.95098	0.999904	21361	1	-2.6554	0.015784	0.015787	0.659585	372	0	-2.6554
Slc1a6	5	0.75768	0.86598	0.999904	19065	2	-3.8049	0.015784	0.015787	0.659585	373	0	-3.8049
Baz1a	5	0.49071	0.71493	0.999904	15437	1	-3.4522	0.015784	0.015787	0.659585	374	0	-3.4522
E230025N22Rik	5	0.20343	0.42847	0.996612	9156	3	-5.2031	0.015784	0.015787	0.659585	375	0	-5.2031
Gm5800	5	0.27361	0.50301	0.999197	11047	3	-5.0371	0.015784	0.015787	0.659585	376	0	-5.0371
Cables1	5	0.34695	0.57776	0.999904	12727	1	-2.8161	0.015784	0.015787	0.659585	377	0	-2.8161
Ogfod2	5	0.59966	0.77506	0.999904	17029	2	-3.9043	0.015784	0.015787	0.659585	378	0	-3.9043
Esyt2	5	0.15918	0.36362	0.991654	7791	4	-5.082	0.015784	0.015787	0.659585	379	0	-5.082
Nampt	5	0.99339	0.99337	0.999904	22308	0	-3.6513	0.015784	0.015787	0.659585	380	0	-3.6513
Abca17	5	0.34989	0.58065	0.999904	12789	3	-4.8792	0.015784	0.015787	0.659585	381	0	-4.8792
Txndc5	5	0.47286	0.6985	0.999904	15119	2	-3.4025	0.015784	0.015787	0.659585	382	0	-3.4025
C1qtnf1	5	0.32351	0.55427	0.999904	12245	3	-4.9348	0.015784	0.015787	0.659585	383	0	-4.9348
Ctnnbl1	5	0.96532	0.96561	0.999904	21694	1	-4.0666	0.015784	0.015787	0.659585	384	0	-4.0666
Sync	5	0.66783	0.81263	0.999904	18021	2	-3.8752	0.015784	0.015787	0.659585	385	0	-3.8752
Pir	5	0.053184	0.1596	0.95069	3479	3	-5.7328	0.015784	0.015787	0.659585	386	0	-5.7328
Nlrp6	5	0.34386	0.57477	0.999904	12687	3	-4.8935	0.015784	0.015787	0.659585	387	0	-4.8935
Tubb1	2	0.34258	0.439	0.996612	12666	1	-3.0309	0.015924	0.015935	0.659585	388	0	-3.0309
Olfr635	2	0.9942	0.99418	0.999904	22333	0	-0.8829	0.015924	0.015935	0.659585	389	0	-0.8829
Hist1h2bm	1	0.98281	0.98285	0.999904	22052	0	-0.32034	0.017189	0.017155	0.659585	390	0	-0.32034
Gm5935	1	0.98281	0.98285	0.999904	22053	0	-0.32034	0.017189	0.017155	0.659585	391	0	-0.32034
Snx9	6	0.41857	0.6723	0.999904	14123	3	-4.4752	0.01891	0.019023	0.659585	392	0	-4.4752
Olr1	6	0.57247	0.78405	0.999904	16633	2	-2.1657	0.01891	0.019023	0.659585	393	0	-2.1657
Hs6st1	6	0.59833	0.80263	0.999904	17012	2	-3.9533	0.01891	0.019023	0.659585	394	0	-3.9533
Agpat6	6	0.91479	0.95383	0.999904	20908	1	-3.7794	0.01891	0.019023	0.659585	395	0	-3.7794
Trim25	6	0.86819	0.93593	0.999904	20369	2	-3.9713	0.01891	0.019023	0.659585	396	0	-3.9713
Osbpl11	6	0.41857	0.6723	0.999904	14125	3	-4.1374	0.01891	0.019023	0.659585	397	0	-4.1374
Taf15	6	0.31809	0.58654	0.999904	12117	2	-3.528	0.01891	0.019023	0.659585	398	0	-3.528
Cacng6	6	0.1429	0.35275	0.989893	7242	2	-3.2375	0.01891	0.019023	0.659585	399	0	-3.2375
Kmt2d	6	0.42913	0.6801	0.999904	14327	2	-3.9894	0.01891	0.019023	0.659585	400	0	-3.9894
Ipo13	6	0.99653	0.99657	0.999942	22385	0	-3.0468	0.01891	0.019023	0.659585	401	0	-3.0468
Olfr772	6	0.015248	0.065709	0.906307	1267	3	-4.4835	0.01891	0.019023	0.659585	402	0	-4.4835
Agps	6	0.57971	0.78922	0.999904	16726	2	-3.8886	0.01891	0.019023	0.659585	403	0	-3.8886
Pigm	6	0.29979	0.5643	0.999904	11698	3	-4.6729	0.01891	0.019023	0.659585	404	0	-4.6729
Itga5	6	0.14279	0.35259	0.989893	7241	3	-5.0542	0.01891	0.019023	0.659585	405	0	-5.0542
Slc16a5	6	0.21856	0.45993	0.997696	9570	4	-4.9693	0.01891	0.019023	0.659585	406	0	-4.9693
Gabra4	6	0.10064	0.28246	0.980763	5629	4	-5.1965	0.01891	0.019023	0.659585	407	0	-5.1965
Olfr353	6	0.0082258	0.037639	0.873275	709	2	-3.9126	0.01891	0.019023	0.659585	408	0	-3.9126
Uqcc2	6	0.87215	0.93808	0.999904	20410	2	-4.1442	0.01891	0.019023	0.659585	409	0	-4.1442
Ppil2	6	0.34011	0.61256	0.999904	12609	4	-4.6185	0.01891	0.019023	0.659585	410	0	-4.6185
Nuak2	6	0.47639	0.71463	0.999904	15175	3	-4.2125	0.01891	0.019023	0.659585	411	0	-4.2125
Aak1	6	0.27709	0.53598	0.999904	11134	3	-4.1503	0.01891	0.019023	0.659585	412	0	-4.1503
Zfp408	6	0.18199	0.40949	0.994281	8542	2	-4.1734	0.01891	0.019023	0.659585	413	0	-4.1734
Olfr1357	6	0.030372	0.11019	0.930147	2250	3	-4.8588	0.01891	0.019023	0.659585	414	0	-4.8588
Spata6	6	0.67397	0.84998	0.999904	18095	1	-3.2649	0.01891	0.019023	0.659585	415	0	-3.2649
Chek2	6	0.2119	0.45093	0.997696	9383	4	-5.097	0.01891	0.019023	0.659585	416	0	-5.097
BC030307	6	0.15079	0.36438	0.991654	7501	3	-4.7548	0.01891	0.019023	0.659585	417	0	-4.7548
Gps2	6	0.60225	0.80542	0.999904	17073	1	-4.1674	0.01891	0.019023	0.659585	418	0	-4.1674
Naa60	6	0.036583	0.12728	0.931052	2607	4	-5.5778	0.01891	0.019023	0.659585	419	0	-5.5778
Akna	6	0.22909	0.47405	0.998691	9847	3	-4.2807	0.01891	0.019023	0.659585	420	0	-4.2807
Agpat9	6	0.26369	0.51905	0.999197	10802	1	-2.9496	0.01891	0.019023	0.659585	421	0	-2.9496
Fam162a	6	0.35989	0.62879	0.999904	12982	3	-4.4266	0.01891	0.019023	0.659585	422	0	-4.4266
Pnma2	6	0.80857	0.90592	0.999904	19713	2	-4.2492	0.01891	0.019023	0.659585	423	0	-4.2492
Kifc5b	6	0.011215	0.049912	0.883094	971	4	-5.9593	0.01891	0.019023	0.659585	424	0	-5.9593
Slc24a4	6	0.37574	0.64061	0.999904	13313	3	-4.7746	0.01891	0.019023	0.659585	425	0	-4.7746
Plcb3	6	0.21351	0.45316	0.997696	9421	3	-3.21	0.01891	0.019023	0.659585	426	0	-3.21
Cxcl11	6	0.2612	0.51594	0.999197	10737	4	-4.9573	0.01891	0.019023	0.659585	427	0	-4.9573
Ecm1	6	0.92768	0.95712	0.999904	21083	1	-3.6187	0.01891	0.019023	0.659585	428	0	-3.6187
Ihh	6	0.98725	0.98727	0.999904	22151	0	-4.0104	0.01891	0.019023	0.659585	429	0	-4.0104
Prm1	6	0.57292	0.78437	0.999904	16638	1	-3.1939	0.01891	0.019023	0.659585	430	0	-3.1939
Yy1	6	0.25243	0.50454	0.999197	10493	4	-4.8367	0.01891	0.019023	0.659585	431	0	-4.8367
2210404O09Rik	6	0.15492	0.37047	0.991654	7640	3	-4.6518	0.01891	0.019023	0.659585	432	0	-4.6518
Sec63	6	0.31095	0.57791	0.999904	11961	2	-3.1445	0.01891	0.019023	0.659585	433	0	-3.1445
Tbc1d10b	6	0.4211	0.67417	0.999904	14175	2	-2.9552	0.01891	0.019023	0.659585	434	0	-2.9552
Camsap1	6	0.63064	0.8254	0.999904	17481	3	-4.435	0.01891	0.019023	0.659585	435	0	-4.435
Olfr1377	6	0.2152	0.45544	0.997696	9469	3	-4.6098	0.01891	0.019023	0.659585	436	0	-4.6098
Prkab1	6	0.4235	0.67596	0.999904	14225	3	-4.4361	0.01891	0.019023	0.659585	437	0	-4.4361
March5	6	0.29647	0.56019	0.999904	11618	1	-2.8555	0.01891	0.019023	0.659585	438	0	-2.8555
Adat1	6	0.31541	0.5833	0.999904	12062	3	-4.4522	0.01891	0.019023	0.659585	439	0	-4.4522
Nipal4	6	0.77899	0.89262	0.999904	19326	2	-3.1998	0.01891	0.019023	0.659585	440	0	-3.1998
Ralyl	6	0.033302	0.11835	0.931052	2422	5	-5.2674	0.01891	0.019023	0.659585	441	0	-5.2674
Maml3	6	0.069111	0.21014	0.965372	4271	3	-4.7469	0.01891	0.019023	0.659585	442	0	-4.7469
D10Jhu81e	6	0.48692	0.72226	0.999904	15363	2	-3.9974	0.01891	0.019023	0.659585	443	0	-3.9974
Cradd	6	0.23585	0.48296	0.999197	10027	2	-2.1551	0.01891	0.019023	0.659585	444	0	-2.1551
Glipr1l2	6	0.18796	0.41786	0.994281	8749	3	-4.8759	0.01891	0.019023	0.659585	445	0	-4.8759
Vmn1r33	6	0.48563	0.72129	0.999904	15344	3	-4.643	0.01891	0.019023	0.659585	446	0	-4.643
Olfr1018	6	0.47675	0.71487	0.999904	15181	2	-1.9228	0.01891	0.019023	0.659585	447	0	-1.9228
Man2b1	6	0.041973	0.14177	0.943457	2908	4	-5.5894	0.01891	0.019023	0.659585	448	0	-5.5894
3010026O09Rik	6	0.0093714	0.04238	0.873275	819	4	-5.875	0.01891	0.019023	0.659585	449	0	-5.875
Golph3l	6	0.40665	0.66351	0.999904	13893	3	-4.2729	0.01891	0.019023	0.659585	450	0	-4.2729
Atxn7l1	6	0.73645	0.87443	0.999904	18819	2	-2.0621	0.01891	0.019023	0.659585	451	0	-2.0621
Nek5	6	0.34094	0.6135	0.999904	12629	3	-4.4306	0.01891	0.019023	0.659585	452	0	-4.4306
Vamp5	6	0.29027	0.55252	0.999904	11464	2	-4.4886	0.01891	0.019023	0.659585	453	0	-4.4886
Wbscr27	6	0.30103	0.5658	0.999904	11717	2	-2.9284	0.01891	0.019023	0.659585	454	0	-2.9284
Ubtf	6	0.98849	0.98854	0.999904	22184	0	-3.1522	0.01891	0.019023	0.659585	455	0	-3.1522
Ciz1	6	0.15536	0.37113	0.991654	7651	4	-5.0751	0.01891	0.019023	0.659585	456	0	-5.0751
Tbpl1	6	0.01077	0.048106	0.881168	923	5	-5.4375	0.01891	0.019023	0.659585	457	0	-5.4375
Atf6	6	0.46735	0.708	0.999904	15017	3	-4.4866	0.01891	0.019023	0.659585	458	0	-4.4866
Slfn9	6	0.86243	0.93283	0.999904	20302	2	-3.5328	0.01891	0.019023	0.659585	459	0	-3.5328
Inpp5a	6	0.7058	0.86226	0.999904	18456	2	-2.5423	0.01891	0.019023	0.659585	460	0	-2.5423
Pip	6	0.29906	0.56339	0.999904	11681	4	-4.6801	0.01891	0.019023	0.659585	461	0	-4.6801
Zic1	6	0.69044	0.85627	0.999904	18282	2	-3.7963	0.01891	0.019023	0.659585	462	0	-3.7963
Opn1mw	6	0.53625	0.75818	0.999904	16114	1	-1.7453	0.01891	0.019023	0.659585	463	0	-1.7453
Olfr165	6	0.10678	0.29585	0.983436	5897	3	-4.2472	0.01891	0.019023	0.659585	464	0	-4.2472
Mroh5	6	0.13916	0.34711	0.98953	7115	3	-4.5223	0.01891	0.019023	0.659585	465	0	-4.5223
Samd7	6	0.2944	0.5577	0.999904	11575	2	-4.0874	0.01891	0.019023	0.659585	466	0	-4.0874
Odf3b	6	0.26067	0.51524	0.999197	10721	3	-4.5848	0.01891	0.019023	0.659585	467	0	-4.5848
Abca8b	6	0.95332	0.96566	0.999904	21482	1	-4.0246	0.01891	0.019023	0.659585	468	0	-4.0246
Sptb	6	0.93153	0.9582	0.999904	21142	1	-3.3246	0.01891	0.019023	0.659585	469	0	-3.3246
Krt83	6	0.86315	0.93321	0.999904	20312	2	-4.3729	0.01891	0.019023	0.659585	470	0	-4.3729
Plet1	6	0.12146	0.32007	0.984558	6458	4	-5.3372	0.01891	0.019023	0.659585	471	0	-5.3372
Kdm3b	6	0.79206	0.89839	0.999904	19488	1	-4.0687	0.01891	0.019023	0.659585	472	0	-4.0687
Sdha	6	0.79007	0.8975	0.999904	19462	2	-3.7048	0.01891	0.019023	0.659585	473	0	-3.7048
Gab1	6	0.39768	0.65692	0.999904	13711	3	-3.6014	0.01891	0.019023	0.659585	474	0	-3.6014
Chmp1a	6	0.54352	0.76342	0.999904	16220	3	-4.5671	0.01891	0.019023	0.659585	475	0	-4.5671
Csnka2ip	6	0.80992	0.90656	0.999904	19730	2	-3.3623	0.01891	0.019023	0.659585	476	0	-3.3623
Fam178b	6	0.93795	0.96019	0.999904	21237	1	-2.9447	0.01891	0.019023	0.659585	477	0	-2.9447
Ube2m	6	0.011433	0.050791	0.885592	988	4	-5.0202	0.01891	0.019023	0.659585	478	0	-5.0202
Cpsf4l	6	0.050309	0.16348	0.952464	3338	2	-4.3703	0.01891	0.019023	0.659585	479	0	-4.3703
Olfr1154	6	0.11432	0.30909	0.984117	6197	3	-4.6998	0.01891	0.019023	0.659585	480	0	-4.6998
Laptm4a	6	0.45116	0.69622	0.999904	14711	3	-4.1983	0.01891	0.019023	0.659585	481	0	-4.1983
Ddb2	6	0.29105	0.5535	0.999904	11484	4	-4.6887	0.01891	0.019023	0.659585	482	0	-4.6887
Odf4	6	0.53976	0.76067	0.999904	16161	2	-2.904	0.01891	0.019023	0.659585	483	0	-2.904
Cryba1	6	0.18286	0.41071	0.994281	8564	4	-4.8349	0.01891	0.019023	0.659585	484	0	-4.8349
Tnfrsf11a	6	0.61329	0.81326	0.999904	17226	3	-4.3743	0.01891	0.019023	0.659585	485	0	-4.3743
Psmd13	6	0.51529	0.74307	0.999904	15813	3	-3.3969	0.01891	0.019023	0.659585	486	0	-3.3969
Tdrd12	6	0.8408	0.9216	0.999904	20082	2	-3.3493	0.01891	0.019023	0.659585	487	0	-3.3493
Flot1	6	0.95066	0.9646	0.999904	21436	1	-3.6785	0.01891	0.019023	0.659585	488	0	-3.6785
Gchfr	6	0.24049	0.48901	0.999197	10172	3	-4.8767	0.01891	0.019023	0.659585	489	0	-4.8767
Htr2a	6	0.52825	0.75241	0.999904	15984	3	-4.3119	0.01891	0.019023	0.659585	490	0	-4.3119
Myom1	6	0.2313	0.47695	0.99907	9908	4	-5.0558	0.01891	0.019023	0.659585	491	0	-5.0558
Tceal6	6	0.49808	0.73041	0.999904	15571	1	-3.1266	0.01891	0.019023	0.659585	492	0	-3.1266
Ifitm2	6	0.016117	0.068616	0.906307	1330	4	-5.8342	0.01891	0.019023	0.659585	493	0	-5.8342
Hsd17b3	6	0.15278	0.36732	0.991654	7561	2	-4.1777	0.01891	0.019023	0.659585	494	0	-4.1777
Olfr1366	6	0.071645	0.21617	0.966362	4396	5	-4.8344	0.01891	0.019023	0.659585	495	0	-4.8344
Ermard	6	0.5095	0.7388	0.999904	15734	3	-3.7933	0.01891	0.019023	0.659585	496	0	-3.7933
Casp9	6	0.23774	0.48544	0.999197	10096	3	-4.5576	0.01891	0.019023	0.659585	497	0	-4.5576
Sun1	6	0.11619	0.31195	0.984117	6269	3	-5.0442	0.01891	0.019023	0.659585	498	0	-5.0442
Foxred1	6	0.26141	0.5162	0.999197	10745	3	-4.8983	0.01891	0.019023	0.659585	499	0	-4.8983
Ptrf	6	0.55874	0.77422	0.999904	16437	3	-3.8054	0.01891	0.019023	0.659585	500	0	-3.8054
Olfr872	6	0.42482	0.67692	0.999904	14249	2	-2.3097	0.01891	0.019023	0.659585	501	0	-2.3097
Olfr1208	6	0.053456	0.17157	0.954222	3495	1	-3.4156	0.01891	0.019023	0.659585	502	0	-3.4156
Wdr6	6	0.99242	0.99244	0.999904	22282	0	-3.4752	0.01891	0.019023	0.659585	503	0	-3.4752
Thoc2	6	0.97789	0.97889	0.999904	21952	1	-3.0179	0.01891	0.019023	0.659585	504	0	-3.0179
D330045A20Rik	6	0.40456	0.662	0.999904	13852	2	-3.4136	0.01891	0.019023	0.659585	505	0	-3.4136
Bpifb9a	6	0.020445	0.081657	0.919324	1603	3	-3.4912	0.01891	0.019023	0.659585	506	0	-3.4912
Exosc10	6	0.20457	0.44097	0.996612	9187	3	-4.9479	0.01891	0.019023	0.659585	507	0	-4.9479
Lrrc3b	6	0.22839	0.4731	0.998691	9825	3	-4.6633	0.01891	0.019023	0.659585	508	0	-4.6633
Stk31	6	0.54708	0.76594	0.999904	16264	2	-4.4575	0.01891	0.019023	0.659585	509	0	-4.4575
Cyp1a1	6	0.096412	0.27313	0.980763	5449	4	-5.2879	0.01891	0.019023	0.659585	510	0	-5.2879
Pik3ip1	6	0.88879	0.94746	0.999904	20623	2	-3.5251	0.01891	0.019023	0.659585	511	0	-3.5251
Zdhhc23	6	0.9896	0.98964	0.999904	22210	0	-3.5004	0.01891	0.019023	0.659585	512	0	-3.5004
Pcsk5	6	0.98346	0.98357	0.999904	22072	1	-3.9015	0.01891	0.019023	0.659585	513	0	-3.9015
Lsm2	6	0.62483	0.82136	0.999904	17409	2	-3.5119	0.01891	0.019023	0.659585	514	0	-3.5119
Cdpf1	6	0.39688	0.65633	0.999904	13693	2	-3.9609	0.01891	0.019023	0.659585	515	0	-3.9609
Mmp17	6	0.25025	0.50162	0.999197	10424	3	-4.4288	0.01891	0.019023	0.659585	516	0	-4.4288
Orc5	6	0.12559	0.32645	0.985049	6602	2	-4.3833	0.01891	0.019023	0.659585	517	0	-4.3833
Nlrp3	6	0.83971	0.92105	0.999904	20066	2	-2.8634	0.01891	0.019023	0.659585	518	0	-2.8634
Gm3285	6	0.61161	0.81208	0.999904	17212	1	-3.2789	0.01891	0.019023	0.659585	519	0	-3.2789
Med11	6	0.9765	0.97787	0.999904	21922	1	-3.332	0.01891	0.019023	0.659585	520	0	-3.332
Il18	6	0.21562	0.45603	0.997696	9485	4	-4.9598	0.01891	0.019023	0.659585	521	0	-4.9598
Nlrc4	6	0.366	0.6334	0.999904	13108	2	-3.5263	0.01891	0.019023	0.659585	522	0	-3.5263
Eef1a2	6	0.86405	0.93371	0.999904	20325	2	-3.9849	0.01891	0.019023	0.659585	523	0	-3.9849
Ckap2	6	0.39853	0.65755	0.999904	13728	3	-4.3598	0.01891	0.019023	0.659585	524	0	-4.3598
Bpifa5	6	0.061475	0.19165	0.957824	3916	4	-5.3389	0.01891	0.019023	0.659585	525	0	-5.3389
1700067K01Rik	6	0.61623	0.81537	0.999904	17275	3	-4.2294	0.01891	0.019023	0.659585	526	0	-4.2294
Csk	6	0.30931	0.57592	0.999904	11921	2	-3.8947	0.01891	0.019023	0.659585	527	0	-3.8947
Defb41	6	0.49013	0.72455	0.999904	15429	3	-4.5704	0.01891	0.019023	0.659585	528	0	-4.5704
Bbs5	6	0.28224	0.54239	0.999904	11253	2	-3.7372	0.01891	0.019023	0.659585	529	0	-3.7372
Gstm3	6	0.35065	0.62198	0.999904	12806	3	-4.5056	0.01891	0.019023	0.659585	530	0	-4.5056
Polq	6	0.23901	0.48709	0.999197	10128	3	-4.2667	0.01891	0.019023	0.659585	531	0	-4.2667
E130308A19Rik	6	0.25767	0.51135	0.999197	10634	1	-3.9463	0.01891	0.019023	0.659585	532	0	-3.9463
Tsg101	6	0.99381	0.99384	0.999904	22324	0	-2.8047	0.01891	0.019023	0.659585	533	0	-2.8047
Ndufaf5	6	0.26067	0.51524	0.999197	10720	4	-4.9821	0.01891	0.019023	0.659585	534	0	-4.9821
Cacng4	6	0.34348	0.61643	0.999904	12682	2	-3.7354	0.01891	0.019023	0.659585	535	0	-3.7354
Kcnk10	6	0.59505	0.80032	0.999904	16965	3	-3.9905	0.01891	0.019023	0.659585	536	0	-3.9905
Snx11	6	0.64735	0.8372	0.999904	17732	2	-3.5343	0.01891	0.019023	0.659585	537	0	-3.5343
Pomgnt2	6	0.049439	0.16123	0.951117	3293	1	-3.2154	0.01891	0.019023	0.659585	538	0	-3.2154
Ociad2	6	0.1663	0.38721	0.992263	8015	4	-5.1503	0.01891	0.019023	0.659585	539	0	-5.1503
Hhla1	6	0.21039	0.44886	0.997696	9344	2	-4.0193	0.01891	0.019023	0.659585	540	0	-4.0193
Wnk3	6	0.16962	0.39197	0.994214	8135	2	-3.7523	0.01891	0.019023	0.659585	541	0	-3.7523
Prmt8	6	0.079005	0.23344	0.971523	4712	2	-2.9803	0.01891	0.019023	0.659585	542	0	-2.9803
Atp6v1g2	6	0.081122	0.23839	0.971523	4813	3	-4.9186	0.01891	0.019023	0.659585	543	0	-4.9186
Dnttip2	6	0.35904	0.62815	0.999904	12968	1	-4.1461	0.01891	0.019023	0.659585	544	0	-4.1461
Ncoa2	6	0.17983	0.40648	0.994281	8475	4	-4.7033	0.01891	0.019023	0.659585	545	0	-4.7033
Ifi30	6	0.81185	0.9075	0.999904	19755	1	-3.1557	0.01891	0.019023	0.659585	546	0	-3.1557
Terf1	6	0.59735	0.80194	0.999904	17002	1	-2.9046	0.01891	0.019023	0.659585	547	0	-2.9046
Tmem63b	6	0.1608	0.37918	0.991903	7846	3	-4.6133	0.01891	0.019023	0.659585	548	0	-4.6133
Pja2	6	0.25404	0.50665	0.999197	10544	3	-3.8775	0.01891	0.019023	0.659585	549	0	-3.8775
Pcdh10	6	0.22964	0.47477	0.998691	9862	4	-4.9409	0.01891	0.019023	0.659585	550	0	-4.9409
Setd2	6	0.55263	0.76988	0.999904	16347	2	-2.0413	0.01891	0.019023	0.659585	551	0	-2.0413
Olfr761	6	0.3966	0.65614	0.999904	13689	2	-3.5347	0.01891	0.019023	0.659585	552	0	-3.5347
Ifi204	6	0.71813	0.86711	0.999904	18600	1	-3.1855	0.01891	0.019023	0.659585	553	0	-3.1855
Prlr	6	0.52422	0.74949	0.999904	15934	3	-4.4303	0.01891	0.019023	0.659585	554	0	-4.4303
Opa3	6	0.50223	0.73344	0.999904	15636	2	-3.9305	0.01891	0.019023	0.659585	555	0	-3.9305
Psmc5	6	0.73247	0.8728	0.999904	18759	2	-0.78019	0.01891	0.019023	0.659585	556	0	-0.78019
Zfp120	6	0.3394	0.61172	0.999904	12594	2	-3.9886	0.01891	0.019023	0.659585	557	0	-3.9886
Jmjd4	6	0.58743	0.79479	0.999904	16846	2	-3.5972	0.01891	0.019023	0.659585	558	0	-3.5972
Bnip2	6	0.99361	0.99365	0.999904	22317	0	-2.2824	0.01891	0.019023	0.659585	559	0	-2.2824
Prkab2	6	0.70971	0.86378	0.999904	18495	2	-4.2043	0.01891	0.019023	0.659585	560	0	-4.2043
Rab33a	6	0.99999	1.0	0.999995	22468	0	-0.50723	0.01891	0.019023	0.659585	561	0	-0.50723
Dhx32	6	0.026662	0.099669	0.922993	2015	2	-3.795	0.01891	0.019023	0.659585	562	0	-3.795
Asap3	6	0.555	0.7716	0.999904	16378	1	-2.9797	0.01891	0.019023	0.659585	563	0	-2.9797
Phf10	6	0.9503	0.96447	0.999904	21430	1	-3.5258	0.01891	0.019023	0.659585	564	0	-3.5258
Pikfyve	6	0.58998	0.79666	0.999904	16887	2	-3.1574	0.01891	0.019023	0.659585	565	0	-3.1574
Tspan1	6	0.55552	0.77196	0.999904	16396	1	-3.5897	0.01891	0.019023	0.659585	566	0	-3.5897
Tex19.1	6	0.23483	0.4816	0.999197	10005	3	-4.579	0.01891	0.019023	0.659585	567	0	-4.579
Grm1	6	0.14504	0.35591	0.990917	7327	2	-3.342	0.01891	0.019023	0.659585	568	0	-3.342
Rnft2	6	0.37694	0.64152	0.999904	13325	3	-4.6251	0.01891	0.019023	0.659585	569	0	-4.6251
Gabrg2	6	0.80127	0.90253	0.999904	19608	2	-3.1389	0.01891	0.019023	0.659585	570	0	-3.1389
Pgr15l	6	0.39115	0.65213	0.999904	13574	2	-3.1535	0.01891	0.019023	0.659585	571	0	-3.1535
1110025L11Rik	6	0.0018989	0.0095778	0.684976	220	4	-5.8842	0.01891	0.019023	0.659585	572	0	-5.8842
Tekt3	6	0.81924	0.91096	0.999904	19838	2	-3.6957	0.01891	0.019023	0.659585	573	0	-3.6957
Gm16432	6	0.86927	0.93652	0.999904	20378	1	-1.8299	0.01891	0.019023	0.659585	574	0	-1.8299
Ptpn5	6	0.57292	0.78437	0.999904	16639	1	-4.0117	0.01891	0.019023	0.659585	575	0	-4.0117
Drc1	6	0.33808	0.61021	0.999904	12569	2	-3.6079	0.01891	0.019023	0.659585	576	0	-3.6079
Actr1b	6	0.33956	0.61191	0.999904	12597	4	-4.8647	0.01891	0.019023	0.659585	577	0	-4.8647
Sult2a5	6	0.18058	0.40752	0.994281	8493	3	-3.8114	0.01891	0.019023	0.659585	578	0	-3.8114
Spert	6	0.98823	0.98827	0.999904	22179	0	-3.5098	0.01891	0.019023	0.659585	579	0	-3.5098
Ippk	6	0.86405	0.93371	0.999904	20323	2	-4.1511	0.01891	0.019023	0.659585	580	0	-4.1511
3110062M04Rik	6	0.22335	0.46637	0.997696	9700	3	-4.317	0.01891	0.019023	0.659585	581	0	-4.317
Dcaf8	6	0.4733	0.71232	0.999904	15130	2	-3.3902	0.01891	0.019023	0.659585	582	0	-3.3902
Acadvl	6	0.68615	0.8546	0.999904	18233	2	-1.3722	0.01891	0.019023	0.659585	583	0	-1.3722
BC048502	6	0.23997	0.48835	0.999197	10151	4	-4.9135	0.01891	0.019023	0.659585	584	0	-4.9135
Etl4	6	0.46417	0.70567	0.999904	14962	2	-2.8219	0.01891	0.019023	0.659585	585	0	-2.8219
P2rx6	6	0.57136	0.78325	0.999904	16612	3	-4.6324	0.01891	0.019023	0.659585	586	0	-4.6324
Cldn10	6	0.15751	0.37432	0.991654	7728	3	-3.1742	0.01891	0.019023	0.659585	587	0	-3.1742
Gpsm3	6	0.12179	0.32061	0.984987	6470	4	-5.28	0.01891	0.019023	0.659585	588	0	-5.28
Nfatc2ip	6	0.090357	0.2595	0.980532	5199	5	-5.1359	0.01891	0.019023	0.659585	589	0	-5.1359
Bpifa6	6	0.58029	0.78965	0.999904	16746	2	-4.0199	0.01891	0.019023	0.659585	590	0	-4.0199
Uqcrb	6	0.93355	0.9588	0.999904	21169	1	-2.02	0.01891	0.019023	0.659585	591	0	-2.02
Npc2	6	0.80206	0.90289	0.999904	19620	2	-3.8288	0.01891	0.019023	0.659585	592	0	-3.8288
Slc4a2	6	0.64876	0.83818	0.999904	17752	3	-3.6865	0.01891	0.019023	0.659585	593	0	-3.6865
Gpt	6	0.43399	0.68359	0.999904	14397	2	-4.2096	0.01891	0.019023	0.659585	594	0	-4.2096
Abcc1	6	0.99065	0.99066	0.999904	22234	0	-2.9245	0.01891	0.019023	0.659585	595	0	-2.9245
Rnf138rt1	6	0.36208	0.63045	0.999904	13025	3	-4.8225	0.01891	0.019023	0.659585	596	0	-4.8225
Fuz	6	0.74951	0.87985	0.999904	18973	2	-4.1085	0.01891	0.019023	0.659585	597	0	-4.1085
AU015228	6	0.37784	0.6422	0.999904	13346	2	-2.4349	0.01891	0.019023	0.659585	598	0	-2.4349
Akap9	6	0.29248	0.55532	0.999904	11534	2	-4.256	0.01891	0.019023	0.659585	599	0	-4.256
3632451O06Rik	6	0.011182	0.049784	0.883094	965	4	-5.8232	0.01891	0.019023	0.659585	600	0	-5.8232
Olfr822	6	0.26981	0.52687	0.999197	10952	3	-4.8039	0.01891	0.019023	0.659585	601	0	-4.8039
Tcf21	6	0.23711	0.48463	0.999197	10072	4	-4.6989	0.01891	0.019023	0.659585	602	0	-4.6989
Olfr1321	6	0.259	0.51308	0.999197	10668	2	-3.5919	0.01891	0.019023	0.659585	603	0	-3.5919
Gfm1	6	0.6135	0.81341	0.999904	17237	3	-3.5774	0.01891	0.019023	0.659585	604	0	-3.5774
Ces1g	6	0.4844	0.72042	0.999904	15320	2	-4.4282	0.01891	0.019023	0.659585	605	0	-4.4282
Dlx3	6	0.33078	0.60164	0.999904	12401	4	-4.6073	0.01891	0.019023	0.659585	606	0	-4.6073
Mfrp	6	0.057615	0.18206	0.955716	3697	3	-5.1247	0.01891	0.019023	0.659585	607	0	-5.1247
BC048644	6	0.56345	0.77757	0.999904	16505	2	-3.8899	0.01891	0.019023	0.659585	608	0	-3.8899
Myh15	6	0.30872	0.57522	0.999904	11909	2	-3.4977	0.01891	0.019023	0.659585	609	0	-3.4977
Rbp2	6	0.64876	0.83818	0.999904	17749	3	-3.5028	0.01891	0.019023	0.659585	610	0	-3.5028
Myrip	6	0.86315	0.93321	0.999904	20313	2	-4.0236	0.01891	0.019023	0.659585	611	0	-4.0236
Zfp516	6	0.1588	0.37621	0.991758	7779	4	-5.1385	0.01891	0.019023	0.659585	612	0	-5.1385
Gjb5	6	0.64993	0.83899	0.999904	17763	3	-4.4736	0.01891	0.019023	0.659585	613	0	-4.4736
Fbxo16	6	0.4241	0.67638	0.999904	14237	3	-4.4244	0.01891	0.019023	0.659585	614	0	-4.4244
L3hypdh	6	0.21404	0.45389	0.997696	9438	2	-2.9185	0.01891	0.019023	0.659585	615	0	-2.9185
Slc35g3	6	0.23442	0.48105	0.999197	9996	4	-4.9891	0.01891	0.019023	0.659585	616	0	-4.9891
Syt10	6	0.41497	0.66966	0.999904	14057	3	-4.4379	0.01891	0.019023	0.659585	617	0	-4.4379
D17Wsu92e	6	0.49384	0.72726	0.999904	15493	2	-3.5272	0.01891	0.019023	0.659585	618	0	-3.5272
Prl7b1	6	0.13273	0.33735	0.987001	6878	4	-5.1527	0.01891	0.019023	0.659585	619	0	-5.1527
Ccdc71l	6	0.33279	0.60402	0.999904	12461	3	-4.4839	0.01891	0.019023	0.659585	620	0	-4.4839
Dab1	6	0.037125	0.12874	0.931052	2637	3	-4.7221	0.01891	0.019023	0.659585	621	0	-4.7221
4930415F15Rik	6	0.18432	0.41278	0.994281	8623	2	-3.552	0.01891	0.019023	0.659585	622	0	-3.552
Ppp1r42	6	0.16194	0.38084	0.991903	7875	3	-4.8402	0.01891	0.019023	0.659585	623	0	-4.8402
Slc47a2	6	0.56536	0.77894	0.999904	16529	2	-3.003	0.01891	0.019023	0.659585	624	0	-3.003
Olfr1507	6	0.058286	0.18374	0.955716	3735	2	-2.6957	0.01891	0.019023	0.659585	625	0	-2.6957
Rtn2	6	0.31363	0.58111	0.999904	12026	2	-4.0837	0.01891	0.019023	0.659585	626	0	-4.0837
Tra2a	6	0.028004	0.1035	0.927535	2105	2	-3.5497	0.01891	0.019023	0.659585	627	0	-3.5497
Rnf139	6	0.95854	0.96783	0.999904	21577	1	-2.3007	0.01891	0.019023	0.659585	628	0	-2.3007
Lcmt1	6	0.39978	0.65846	0.999904	13757	2	-4.2411	0.01891	0.019023	0.659585	629	0	-4.2411
Stat4	6	0.38621	0.64846	0.999904	13497	3	-4.3559	0.01891	0.019023	0.659585	630	0	-4.3559
E330034G19Rik	6	0.20184	0.4372	0.996612	9105	3	-4.5997	0.01891	0.019023	0.659585	631	0	-4.5997
Defb1	6	0.64131	0.83292	0.999904	17656	3	-4.3882	0.01891	0.019023	0.659585	632	0	-4.3882
Tmc2	6	0.34094	0.6135	0.999904	12630	3	-4.5359	0.01891	0.019023	0.659585	633	0	-4.5359
Crp	6	0.18654	0.41593	0.994281	8699	3	-4.0796	0.01891	0.019023	0.659585	634	0	-4.0796
Edem1	6	0.10088	0.28297	0.980763	5635	1	-2.6777	0.01891	0.019023	0.659585	635	0	-2.6777
Tmem199	6	0.17912	0.40549	0.994281	8453	4	-4.9474	0.01891	0.019023	0.659585	636	0	-4.9474
Dsg2	6	0.82608	0.91432	0.999904	19904	2	-3.8262	0.01891	0.019023	0.659585	637	0	-3.8262
Cltb	6	0.58928	0.79614	0.999904	16878	2	-3.8421	0.01891	0.019023	0.659585	638	0	-3.8421
Olfr1426	6	0.35267	0.62344	0.999904	12841	3	-4.3866	0.01891	0.019023	0.659585	639	0	-4.3866
Pgam1	6	0.82326	0.91292	0.999904	19874	2	-2.8514	0.01891	0.019023	0.659585	640	0	-2.8514
Blnk	6	0.22394	0.46716	0.997935	9717	4	-4.9773	0.01891	0.019023	0.659585	641	0	-4.9773
Atad3a	6	0.87287	0.93847	0.999904	20419	1	-3.3515	0.01891	0.019023	0.659585	642	0	-3.3515
Rcor3	6	0.77013	0.88872	0.999904	19216	2	-3.3567	0.01891	0.019023	0.659585	643	0	-3.3567
Xkr7	6	0.068101	0.2077	0.965372	4221	3	-4.6127	0.01891	0.019023	0.659585	644	0	-4.6127
Amph	6	0.4276	0.67898	0.999904	14301	2	-3.6981	0.01891	0.019023	0.659585	645	0	-3.6981
Rbm15b	6	0.34239	0.61518	0.999904	12658	4	-4.7623	0.01891	0.019023	0.659585	646	0	-4.7623
Slc39a2	6	0.52814	0.75233	0.999904	15980	1	-2.6697	0.01891	0.019023	0.659585	647	0	-2.6697
Hpcal4	6	0.99758	0.9976	0.999942	22405	0	-2.1931	0.01891	0.019023	0.659585	648	0	-2.1931
NonTargetingControlGuideForMouse_0793	1	0.97894	0.97895	0.999904	21969	0	-0.38841	0.021061	0.020987	0.72543	649	0	-0.38841
NonTargetingControlGuideForMouse_0930	1	0.97894	0.97895	0.999904	21970	0	-0.38841	0.021061	0.020987	0.72543	650	0	-0.38841
Mup20	3	0.99813	0.99817	0.999942	22417	0	-0.99603	0.023791	0.023807	0.80434	651	0	-0.99603
Nmi	3	0.72972	0.76515	0.999904	18721	1	-3.5101	0.023791	0.023807	0.80434	652	0	-3.5101
Slc11a1	3	0.46818	0.6232	0.999904	15031	1	-2.353	0.023791	0.023807	0.80434	653	0	-2.353
Scfd1	3	0.94205	0.94223	0.999904	21302	0	-3.5623	0.023791	0.023807	0.80434	654	0	-3.5623
Flad1	3	0.019738	0.050898	0.885592	1561	2	-5.3051	0.023791	0.023807	0.80434	655	0	-5.3051
Syt16	3	0.41687	0.57208	0.999904	14090	1	-3.9943	0.023791	0.023807	0.80434	656	0	-3.9943
Vash1	3	0.99652	0.99661	0.999942	22384	0	-1.2929	0.023791	0.023807	0.80434	657	0	-1.2929
Exosc6	3	0.77127	0.7914	0.999904	19230	1	-4.4576	0.023791	0.023807	0.80434	658	0	-4.4576
Rabep2	3	0.59988	0.69733	0.999904	17034	1	-3.3602	0.023791	0.023807	0.80434	659	0	-3.3602
Hey2	3	0.62561	0.70944	0.999904	17416	1	-2.7481	0.023791	0.023807	0.80434	660	0	-2.7481
Drap1	3	0.19295	0.34053	0.988668	8870	2	-5.379	0.023791	0.023807	0.80434	661	0	-5.379
Ppfia1	3	0.06436	0.15024	0.947718	4044	1	-2.2096	0.023791	0.023807	0.80434	662	0	-2.2096
Zfp532	3	0.40616	0.56138	0.999904	13875	1	-4.4409	0.023791	0.023807	0.80434	663	0	-4.4409
Lasp1	3	0.31438	0.46793	0.997935	12040	2	-5.0402	0.023791	0.023807	0.80434	664	0	-5.0402
Aox2	3	0.88439	0.88459	0.999904	20573	0	-4.5188	0.023791	0.023807	0.80434	665	0	-4.5188
Stmn2	2	0.4858	0.53303	0.999904	15351	1	-2.8432	0.025804	0.025783	0.864615	666	0	-2.8432
C130026I21Rik	2	0.9997	0.99971	0.999942	22458	0	-0.31633	0.025804	0.025783	0.864615	667	0	-0.31633
Phf5a	2	0.8196	0.81939	0.999904	19842	0	-2.2918	0.025804	0.025783	0.864615	668	0	-2.2918
Klra1	2	0.085862	0.14765	0.946062	5012	1	-3.4718	0.025804	0.025783	0.864615	669	0	-3.4718
Psmd12	2	0.96326	0.96348	0.999904	21662	0	-1.6527	0.025804	0.025783	0.864615	670	0	-1.6527
NonTargetingControlGuideForMouse_0986	1	0.97375	0.9738	0.999904	21865	0	-0.41456	0.026252	0.026125	0.873475	671	0	-0.41456
NonTargetingControlGuideForMouse_0687	1	0.97375	0.9738	0.999904	21864	0	-0.41456	0.026252	0.026125	0.873475	672	0	-0.41456
NonTargetingControlGuideForMouse_0568	1	0.96987	0.96998	0.999904	21776	0	-0.56434	0.030128	0.030002	0.927685	673	0	-0.56434
Slc2a1	4	0.78525	0.84727	0.999904	19412	1	-4.0398	0.031595	0.031602	0.927685	674	0	-4.0398
Olfr907	4	0.90302	0.90838	0.999904	20789	1	-2.9425	0.031595	0.031602	0.927685	675	0	-2.9425
Rgs22	4	0.20734	0.39546	0.994281	9253	2	-3.1632	0.031595	0.031602	0.927685	676	0	-3.1632
Prss39	4	0.60453	0.74916	0.999904	17108	1	-2.2948	0.031595	0.031602	0.927685	677	0	-2.2948
Rpl22	4	0.3222	0.54075	0.999904	12215	2	-2.7949	0.031595	0.031602	0.927685	678	0	-2.7949
R3hdml	4	0.090193	0.22102	0.967265	5190	1	-3.239	0.031595	0.031602	0.927685	679	0	-3.239
Hnrnpa2b1	4	0.12779	0.2796	0.980763	6688	2	-4.2844	0.031595	0.031602	0.927685	680	0	-4.2844
Slc39a11	4	0.85292	0.8778	0.999904	20216	1	-2.5946	0.031595	0.031602	0.927685	681	0	-2.5946
P2rx7	4	0.096658	0.23132	0.971523	5454	3	-5.2925	0.031595	0.031602	0.927685	682	0	-5.2925
Mbtps1	4	0.96832	0.96833	0.999904	21741	0	-3.525	0.031595	0.031602	0.927685	683	0	-3.525
Ssrp1	4	0.46725	0.64557	0.999904	15013	2	-4.3083	0.031595	0.031602	0.927685	684	0	-4.3083
Vmn1r10	4	0.083835	0.21075	0.965372	4927	2	-4.5774	0.031595	0.031602	0.927685	685	0	-4.5774
Map10	4	0.015816	0.051625	0.892243	1302	2	-5.5098	0.031595	0.031602	0.927685	686	0	-5.5098
Suv420h1	4	0.80057	0.85345	0.999904	19600	1	-3.6222	0.031595	0.031602	0.927685	687	0	-3.6222
Olfr1215	4	0.14204	0.30121	0.984117	7210	2	-3.8064	0.031595	0.031602	0.927685	688	0	-3.8064
Adra2a	4	0.79723	0.85206	0.999904	19553	1	-3.0855	0.031595	0.031602	0.927685	689	0	-3.0855
Pgbd5	4	0.34708	0.55855	0.999904	12736	1	-4.2419	0.031595	0.031602	0.927685	690	0	-4.2419
Tep1	4	0.17508	0.34968	0.989893	8319	2	-4.6765	0.031595	0.031602	0.927685	691	0	-4.6765
Luc7l	4	0.55026	0.70746	0.999904	16321	1	-3.8991	0.031595	0.031602	0.927685	692	0	-3.8991
Gnpda1	4	0.088959	0.21905	0.967265	5133	1	-3.8046	0.031595	0.031602	0.927685	693	0	-3.8046
Itpripl2	4	0.24737	0.45002	0.997696	10354	3	-4.9624	0.031595	0.031602	0.927685	694	0	-4.9624
Sult2a2	4	0.31289	0.53417	0.999904	12008	2	-4.3835	0.031595	0.031602	0.927685	695	0	-4.3835
Hist1h2bh	4	0.87035	0.88749	0.999904	20394	1	-3.0867	0.031595	0.031602	0.927685	696	0	-3.0867
Fbrs	4	0.80057	0.85345	0.999904	19601	1	-2.3513	0.031595	0.031602	0.927685	697	0	-2.3513
Trappc10	4	0.33244	0.54806	0.999904	12452	2	-3.6268	0.031595	0.031602	0.927685	698	0	-3.6268
Mettl7a1	4	0.14683	0.30826	0.984117	7381	2	-4.3131	0.031595	0.031602	0.927685	699	0	-4.3131
Olfr610	4	0.066708	0.18254	0.955716	4149	3	-5.4245	0.031595	0.031602	0.927685	700	0	-5.4245
Mast1	4	0.72137	0.82428	0.999904	18636	1	-0.65256	0.031595	0.031602	0.927685	701	0	-0.65256
Wnt3	4	0.82642	0.86483	0.999904	19912	1	-3.4106	0.031595	0.031602	0.927685	702	0	-3.4106
Spata24	4	0.27014	0.48006	0.999197	10964	2	-4.2951	0.031595	0.031602	0.927685	703	0	-4.2951
Npvf	4	0.91987	0.92142	0.999904	20968	1	-3.1147	0.031595	0.031602	0.927685	704	0	-3.1147
Ankib1	4	0.061576	0.17319	0.954222	3923	2	-3.5686	0.031595	0.031602	0.927685	705	0	-3.5686
AI182371	4	0.58122	0.73102	0.999904	16763	2	-4.261	0.031595	0.031602	0.927685	706	0	-4.261
Mptx2	4	0.79295	0.85031	0.999904	19500	1	-3.6181	0.031595	0.031602	0.927685	707	0	-3.6181
Tac1	4	0.85202	0.8773	0.999904	20208	1	-2.4553	0.031595	0.031602	0.927685	708	0	-2.4553
Chst5	4	0.11395	0.25835	0.980532	6177	2	-4.2092	0.031595	0.031602	0.927685	709	0	-4.2092
Grn	4	0.62337	0.76379	0.999904	17383	1	-3.2684	0.031595	0.031602	0.927685	710	0	-3.2684
Vmn2r72	4	0.30726	0.52731	0.999197	11867	2	-3.9057	0.031595	0.031602	0.927685	711	0	-3.9057
Slc22a15	4	0.67155	0.8014	0.999904	18072	2	-4.4508	0.031595	0.031602	0.927685	712	0	-4.4508
Uba5	4	0.61543	0.7576	0.999904	17265	1	-0.54127	0.031595	0.031602	0.927685	713	0	-0.54127
Mrpl10	4	0.94825	0.94815	0.999904	21401	0	-2.8312	0.031595	0.031602	0.927685	714	0	-2.8312
Nobox	4	0.15471	0.32001	0.984558	7634	3	-5.036	0.031595	0.031602	0.927685	715	0	-5.036
Csf3	4	0.4022	0.59822	0.999904	13805	1	-1.6852	0.031595	0.031602	0.927685	716	0	-1.6852
Ormdl2	4	0.15734	0.32393	0.985049	7722	1	-4.0149	0.031595	0.031602	0.927685	717	0	-4.0149
Actb	4	0.90233	0.90789	0.999904	20776	1	-2.7415	0.031595	0.031602	0.927685	718	0	-2.7415
Nfe2l3	4	0.56072	0.7154	0.999904	16470	2	-2.804	0.031595	0.031602	0.927685	719	0	-2.804
Gsc	4	0.97958	0.97971	0.999904	21978	0	-3.2322	0.031595	0.031602	0.927685	720	0	-3.2322
Zdhhc22	4	0.68916	0.81436	0.999904	18272	1	-4.3324	0.031595	0.031602	0.927685	721	0	-4.3324
3110007F17Rik	4	0.78688	0.84789	0.999904	19426	1	-3.0963	0.031595	0.031602	0.927685	722	0	-3.0963
Cts7	4	0.36085	0.56845	0.999904	13004	2	-3.0351	0.031595	0.031602	0.927685	723	0	-3.0351
Haus4	4	0.92982	0.93012	0.999904	21115	1	-2.4219	0.031595	0.031602	0.927685	724	0	-2.4219
Olfr1338	4	0.26734	0.47638	0.99907	10895	2	-4.3553	0.031595	0.031602	0.927685	725	0	-4.3553
Olfr679	4	0.16366	0.33322	0.986876	7933	2	-4.5498	0.031595	0.031602	0.927685	726	0	-4.5498
Osm	4	0.97287	0.97292	0.999904	21843	0	-3.405	0.031595	0.031602	0.927685	727	0	-3.405
Shc4	4	0.035232	0.1063	0.929763	2527	3	-5.6592	0.031595	0.031602	0.927685	728	0	-5.6592
Prl2a1	4	0.40458	0.59989	0.999904	13853	2	-4.4285	0.031595	0.031602	0.927685	729	0	-4.4285
Cox17	4	0.36085	0.56845	0.999904	13002	2	-3.6011	0.031595	0.031602	0.927685	730	0	-3.6011
Ybx2	4	0.61484	0.75714	0.999904	17256	2	-2.5834	0.031595	0.031602	0.927685	731	0	-2.5834
Gdnf	4	0.16116	0.32956	0.985934	7854	1	-2.3281	0.031595	0.031602	0.927685	732	0	-2.3281
Tgoln2	1	0.96704	0.96718	0.999904	21722	0	-0.56739	0.032955	0.032865	0.927685	733	0	-0.56739
Myc	2	0.99909	0.9991	0.999942	22443	0	-0.44234	0.034083	0.034012	0.927685	734	0	-0.44234
mmu-mir-343	2	0.23621	0.36568	0.991654	10044	1	-3.1839	0.034083	0.034012	0.927685	735	0	-3.1839
Eri1	3	0.99843	0.99847	0.999942	22427	0	-0.56739	0.038455	0.038424	0.927685	736	0	-0.56739
Lipt2	3	0.73275	0.76696	0.999904	18765	1	-4.3831	0.038455	0.038424	0.927685	737	0	-4.3831
Optc	3	0.10926	0.23816	0.971523	6006	2	-5.6802	0.038455	0.038424	0.927685	738	0	-5.6802
Hspb2	3	0.35102	0.50546	0.999197	12818	1	-4.2962	0.038455	0.038424	0.927685	739	0	-4.2962
Plcd4	3	0.38304	0.53803	0.999904	13431	1	-2.8511	0.038455	0.038424	0.927685	740	0	-2.8511
Esp6-esp5	3	0.029224	0.073368	0.908016	2171	1	-3.7579	0.038455	0.038424	0.927685	741	0	-3.7579
Defb37	3	0.1712	0.31712	0.984117	8190	2	-4.8378	0.038455	0.038424	0.927685	742	0	-4.8378
Srrm3	3	0.99462	0.99472	0.999904	22341	0	-1.6573	0.038455	0.038424	0.927685	743	0	-1.6573
Tex9	3	0.078514	0.17897	0.955716	4687	2	-5.8226	0.038455	0.038424	0.927685	744	0	-5.8226
Cenpw	3	0.038378	0.094131	0.920454	2712	2	-6.0926	0.038455	0.038424	0.927685	745	0	-6.0926
Usp17le	3	0.41687	0.57208	0.999904	14089	1	-4.2126	0.038455	0.038424	0.927685	746	0	-4.2126
4933430I17Rik	3	0.30458	0.4577	0.997696	11797	1	-2.3859	0.038455	0.038424	0.927685	747	0	-2.3859
Pomt1	3	0.956	0.95624	0.999904	21527	0	-3.1138	0.038455	0.038424	0.927685	748	0	-3.1138
Zfp455	3	0.90235	0.90249	0.999904	20782	0	-4.2712	0.038455	0.038424	0.927685	749	0	-4.2712
Gm6406	5	0.98929	0.98933	0.999904	22200	0	-3.0572	0.039337	0.039253	0.927685	750	0	-3.0572
Usp9x	5	0.91497	0.93421	0.999904	20909	1	-2.6554	0.039337	0.039253	0.927685	751	0	-2.6554
Fgf12	5	0.39808	0.62809	0.999904	13720	3	-4.7213	0.039337	0.039253	0.927685	752	0	-4.7213
Uroc1	5	0.026172	0.094459	0.920454	1982	3	-5.897	0.039337	0.039253	0.927685	753	0	-5.897
Trpc1	5	0.11646	0.28714	0.980763	6276	4	-5.4244	0.039337	0.039253	0.927685	754	0	-5.4244
Dppa5a	5	0.29773	0.52803	0.999447	11648	2	-4.5692	0.039337	0.039253	0.927685	755	0	-4.5692
Vapa	5	0.74169	0.85608	0.999904	18887	1	-2.4942	0.039337	0.039253	0.927685	756	0	-2.4942
Amotl1	5	0.14788	0.34398	0.989156	7419	2	-3.6074	0.039337	0.039253	0.927685	757	0	-3.6074
Rhebl1	5	0.11811	0.29019	0.981574	6339	3	-4.7066	0.039337	0.039253	0.927685	758	0	-4.7066
Fads1	5	0.98316	0.98325	0.999904	22065	0	-2.3156	0.039337	0.039253	0.927685	759	0	-2.3156
Gpatch11	5	0.16003	0.36512	0.991654	7817	3	-5.2054	0.039337	0.039253	0.927685	760	0	-5.2054
Trmt11	5	0.097967	0.25185	0.976019	5515	4	-4.9236	0.039337	0.039253	0.927685	761	0	-4.9236
Tatdn3	5	0.068259	0.19175	0.957824	4226	3	-5.3321	0.039337	0.039253	0.927685	762	0	-5.3321
Rbm42	5	0.72922	0.84846	0.999904	18714	1	-3.4522	0.039337	0.039253	0.927685	763	0	-3.4522
Kifc3	5	0.4139	0.64328	0.999904	14030	2	-3.9635	0.039337	0.039253	0.927685	764	0	-3.9635
Olfr1213	5	0.57983	0.76441	0.999904	16736	2	-3.6612	0.039337	0.039253	0.927685	765	0	-3.6612
Prrg1	5	0.72709	0.84717	0.999904	18695	2	-4.1946	0.039337	0.039253	0.927685	766	0	-4.1946
Etv4	5	0.9894	0.98945	0.999904	22202	0	-3.3161	0.039337	0.039253	0.927685	767	0	-3.3161
Auh	5	0.98051	0.98061	0.999904	21997	0	-2.3156	0.039337	0.039253	0.927685	768	0	-2.3156
Olfr24	5	0.66126	0.80893	0.999904	17938	1	-3.8975	0.039337	0.039253	0.927685	769	0	-3.8975
Tlr4	5	0.208	0.43343	0.996612	9282	2	-4.3766	0.039337	0.039253	0.927685	770	0	-4.3766
Kcnu1	5	0.72444	0.84562	0.999904	18666	2	-2.8728	0.039337	0.039253	0.927685	771	0	-2.8728
Gm4894	5	0.38556	0.61587	0.999904	13483	3	-4.598	0.039337	0.039253	0.927685	772	0	-4.598
Iqgap1	5	0.21525	0.44118	0.996612	9472	2	-3.3602	0.039337	0.039253	0.927685	773	0	-3.3602
Rpl18a	5	0.79632	0.89083	0.999904	19547	1	-2.4719	0.039337	0.039253	0.927685	774	0	-2.4719
Mapre1	5	0.98993	0.98997	0.999904	22222	0	-2.114	0.039337	0.039253	0.927685	775	0	-2.114
Slc16a1	5	0.1295	0.31103	0.984117	6758	4	-5.3787	0.039337	0.039253	0.927685	776	0	-5.3787
Prpsap1	5	0.14625	0.34109	0.988714	7365	2	-3.1629	0.039337	0.039253	0.927685	777	0	-3.1629
Hr	5	0.13331	0.31798	0.984117	6910	3	-5.3991	0.039337	0.039253	0.927685	778	0	-5.3991
Ogfrl1	5	0.34806	0.57884	0.999904	12750	1	-3.6227	0.039337	0.039253	0.927685	779	0	-3.6227
Utp14a	5	0.7551	0.86434	0.999904	19037	2	-2.2719	0.039337	0.039253	0.927685	780	0	-2.2719
Rps27l	5	0.76209	0.86879	0.999904	19116	1	-4.0834	0.039337	0.039253	0.927685	781	0	-4.0834
Vmn1r14	5	0.43053	0.65906	0.999904	14346	2	-4.3415	0.039337	0.039253	0.927685	782	0	-4.3415
Lrrc28	5	0.6841	0.82194	0.999904	18201	2	-4.5232	0.039337	0.039253	0.927685	783	0	-4.5232
Msln	5	0.47246	0.69813	0.999904	15111	3	-4.6316	0.039337	0.039253	0.927685	784	0	-4.6316
Wdr18	5	0.9937	0.99369	0.999904	22318	0	-3.5404	0.039337	0.039253	0.927685	785	0	-3.5404
Defb10	5	0.010409	0.041121	0.873275	893	3	-6.1524	0.039337	0.039253	0.927685	786	0	-6.1524
Olfr691	5	0.77706	0.87833	0.999904	19304	1	-3.3148	0.039337	0.039253	0.927685	787	0	-3.3148
Aadacl2	5	0.26865	0.49786	0.999197	10928	3	-4.6986	0.039337	0.039253	0.927685	788	0	-4.6986
Nsun5	5	0.87541	0.91913	0.999904	20448	1	-2.3859	0.039337	0.039253	0.927685	789	0	-2.3859
1110004E09Rik	5	0.95339	0.95588	0.999904	21483	1	-4.1107	0.039337	0.039253	0.927685	790	0	-4.1107
Map3k10	5	0.67819	0.81853	0.999904	18136	1	-3.7475	0.039337	0.039253	0.927685	791	0	-3.7475
Mospd3	5	0.21061	0.43625	0.996612	9348	2	-3.9855	0.039337	0.039253	0.927685	792	0	-3.9855
Gpr62	5	0.88702	0.92311	0.999904	20603	1	-2.517	0.039337	0.039253	0.927685	793	0	-2.517
Clec4a2	5	0.62504	0.78881	0.999904	17411	2	-4.4354	0.039337	0.039253	0.927685	794	0	-4.4354
Cdk9	5	0.0085814	0.034389	0.868407	750	3	-5.142	0.039337	0.039253	0.927685	795	0	-5.142
Snhg11	5	0.093141	0.24243	0.974059	5306	2	-4.5579	0.039337	0.039253	0.927685	796	0	-4.5579
Sept9	5	0.64255	0.79842	0.999904	17675	2	-3.6612	0.039337	0.039253	0.927685	797	0	-3.6612
Nudt15	5	0.37132	0.6019	0.999904	13226	1	-2.4159	0.039337	0.039253	0.927685	798	0	-2.4159
Olfr873	5	0.17147	0.3846	0.992246	8197	2	-3.0322	0.039337	0.039253	0.927685	799	0	-3.0322
Zfp91	5	0.020842	0.077162	0.909843	1628	4	-5.6143	0.039337	0.039253	0.927685	800	0	-5.6143
Anapc4	5	0.98316	0.98325	0.999904	22064	0	-4.2206	0.039337	0.039253	0.927685	801	0	-4.2206
Lmnb1	5	0.9303	0.94179	0.999904	21130	1	-3.5163	0.039337	0.039253	0.927685	802	0	-3.5163
Eif2ak3	5	0.098571	0.25302	0.97762	5534	3	-4.9071	0.039337	0.039253	0.927685	803	0	-4.9071
Parp4	5	0.33155	0.56241	0.999904	12422	2	-3.9679	0.039337	0.039253	0.927685	804	0	-3.9679
Gpr27	5	0.28535	0.51521	0.999197	11327	2	-4.2779	0.039337	0.039253	0.927685	805	0	-4.2779
Hhex	5	0.72581	0.84642	0.999904	18682	1	-3.8373	0.039337	0.039253	0.927685	806	0	-3.8373
Glra1	5	0.069531	0.19437	0.9587	4296	3	-5.4434	0.039337	0.039253	0.927685	807	0	-5.4434
Ccdc147	5	0.77685	0.8782	0.999904	19296	2	-3.0821	0.039337	0.039253	0.927685	808	0	-3.0821
Svs4	5	0.31093	0.54154	0.999904	11959	3	-4.6846	0.039337	0.039253	0.927685	809	0	-4.6846
Rnf217	5	0.84029	0.90861	0.999904	20076	1	-3.9635	0.039337	0.039253	0.927685	810	0	-3.9635
Atp6ap1	5	0.23097	0.45805	0.997696	9897	3	-4.6676	0.039337	0.039253	0.927685	811	0	-4.6676
Aim1	5	0.21744	0.44354	0.997647	9539	3	-4.9831	0.039337	0.039253	0.927685	812	0	-4.9831
Pcbd2	5	0.87541	0.91913	0.999904	20451	1	-2.5712	0.039337	0.039253	0.927685	813	0	-2.5712
Ddx24	5	0.93155	0.94244	0.999904	21143	1	-3.9679	0.039337	0.039253	0.927685	814	0	-3.9679
Gm9125	5	0.091766	0.23971	0.97285	5259	3	-5.5448	0.039337	0.039253	0.927685	815	0	-5.5448
Rabl2	5	0.32351	0.55427	0.999904	12243	3	-4.9348	0.039337	0.039253	0.927685	816	0	-4.9348
Ube2n	5	0.25288	0.48122	0.999197	10512	3	-5.0856	0.039337	0.039253	0.927685	817	0	-5.0856
Slfn5	5	0.32037	0.55108	0.999904	12183	3	-4.9382	0.039337	0.039253	0.927685	818	0	-4.9382
Tmed10	5	0.655	0.80541	0.999904	17855	2	-4.0666	0.039337	0.039253	0.927685	819	0	-4.0666
Arhgap25	5	0.65817	0.8072	0.999904	17898	1	-2.8438	0.039337	0.039253	0.927685	820	0	-2.8438
Clvs2	5	0.76508	0.87065	0.999904	19147	2	-4.3108	0.039337	0.039253	0.927685	821	0	-4.3108
Gtf2f2	5	0.91445	0.93397	0.999904	20904	1	-3.7579	0.039337	0.039253	0.927685	822	0	-3.7579
Btnl10	5	0.084121	0.22445	0.970961	4941	3	-4.6901	0.039337	0.039253	0.927685	823	0	-4.6901
2010315B03Rik	5	0.31343	0.5441	0.999904	12018	2	-3.7072	0.039337	0.039253	0.927685	824	0	-3.7072
Olfr6	5	0.99283	0.99283	0.999904	22293	0	-3.3148	0.039337	0.039253	0.927685	825	0	-3.3148
Psg17	5	0.058306	0.1707	0.954222	3737	4	-5.2654	0.039337	0.039253	0.927685	826	0	-5.2654
Armcx2	5	0.10022	0.25623	0.980071	5610	4	-5.51	0.039337	0.039253	0.927685	827	0	-5.51
Tceb3	5	0.36834	0.59894	0.999904	13165	2	-4.2348	0.039337	0.039253	0.927685	828	0	-4.2348
Mup6	5	0.45049	0.67776	0.999904	14701	1	-3.0322	0.039337	0.039253	0.927685	829	0	-3.0322
Flrt2	5	0.058751	0.17161	0.954222	3761	4	-5.6996	0.039337	0.039253	0.927685	830	0	-5.6996
Tas2r116	5	0.0069237	0.028208	0.859951	611	4	-6.2397	0.039337	0.039253	0.927685	831	0	-6.2397
Tcf12	5	0.58588	0.76763	0.999904	16827	2	-2.9629	0.039337	0.039253	0.927685	832	0	-2.9629
Pea15a	5	0.24229	0.47001	0.997935	10225	3	-4.8226	0.039337	0.039253	0.927685	833	0	-4.8226
Ezh2	5	0.11887	0.29161	0.981574	6372	4	-5.4464	0.039337	0.039253	0.927685	834	0	-5.4464
Ikzf2	5	0.74295	0.85685	0.999904	18902	1	-3.4792	0.039337	0.039253	0.927685	835	0	-3.4792
Olfr221	5	0.5196	0.73333	0.999904	15870	2	-3.9271	0.039337	0.039253	0.927685	836	0	-3.9271
Coq5	5	0.95783	0.95925	0.999904	21562	1	-2.137	0.039337	0.039253	0.927685	837	0	-2.137
Bag3	5	0.04341	0.13806	0.942262	2981	4	-5.2563	0.039337	0.039253	0.927685	838	0	-5.2563
Leo1	5	0.33796	0.56889	0.999904	12566	1	-3.3822	0.039337	0.039253	0.927685	839	0	-3.3822
Fnip1	5	0.38484	0.61519	0.999904	13472	2	-3.7726	0.039337	0.039253	0.927685	840	0	-3.7726
Narf	5	0.4981	0.72172	0.999904	15573	2	-3.4025	0.039337	0.039253	0.927685	841	0	-3.4025
Tmem104	5	0.23731	0.46483	0.997696	10081	3	-5.1029	0.039337	0.039253	0.927685	842	0	-5.1029
Rpl35	5	0.41596	0.64523	0.999904	14074	3	-4.7472	0.039337	0.039253	0.927685	843	0	-4.7472
Gnptg	5	0.18413	0.40562	0.994281	8616	4	-4.7018	0.039337	0.039253	0.927685	844	0	-4.7018
Hepacam2	5	0.32721	0.55802	0.999904	12320	3	-4.9236	0.039337	0.039253	0.927685	845	0	-4.9236
Trim7	5	0.26772	0.49689	0.999197	10901	2	-4.0417	0.039337	0.039253	0.927685	846	0	-4.0417
Smim18	5	0.63003	0.79154	0.999904	17473	2	-4.3831	0.039337	0.039253	0.927685	847	0	-4.3831
Gspt2	5	0.034136	0.11698	0.931052	2463	3	-5.8572	0.039337	0.039253	0.927685	848	0	-5.8572
Chst9	5	0.41178	0.64126	0.999904	13980	3	-4.7531	0.039337	0.039253	0.927685	849	0	-4.7531
Fam83c	5	0.16802	0.37873	0.991903	8082	4	-5.2461	0.039337	0.039253	0.927685	850	0	-5.2461
Hbegf	5	0.030684	0.10856	0.930147	2275	4	-5.8888	0.039337	0.039253	0.927685	851	0	-5.8888
G6pdx	5	0.52151	0.73432	0.999904	15890	2	-3.8	0.039337	0.039253	0.927685	852	0	-3.8
Calr4	5	0.48027	0.7054	0.999904	15244	3	-4.6135	0.039337	0.039253	0.927685	853	0	-4.6135
Crcp	5	0.76126	0.86826	0.999904	19107	1	-2.9983	0.039337	0.039253	0.927685	854	0	-2.9983
Snx6	5	0.77685	0.8782	0.999904	19298	2	-4.5767	0.039337	0.039253	0.927685	855	0	-4.5767
Adrm1	5	0.53594	0.74166	0.999904	16109	2	-2.6031	0.039337	0.039253	0.927685	856	0	-2.6031
Dhx35	5	0.33866	0.56962	0.999904	12579	2	-3.5996	0.039337	0.039253	0.927685	857	0	-3.5996
Mier1	5	0.48793	0.71241	0.999904	15391	2	-4.4396	0.039337	0.039253	0.927685	858	0	-4.4396
Nnat	5	0.8104	0.90025	0.999904	19739	1	-3.4848	0.039337	0.039253	0.927685	859	0	-3.4848
Olfr1504	5	0.66431	0.81065	0.999904	17979	1	-1.5128	0.039337	0.039253	0.927685	860	0	-1.5128
Cep192	5	0.13285	0.31709	0.984117	6889	3	-5.4016	0.039337	0.039253	0.927685	861	0	-5.4016
Nelfb	5	0.090427	0.23709	0.971523	5201	2	-3.9087	0.039337	0.039253	0.927685	862	0	-3.9087
Nfrkb	5	0.44996	0.67726	0.999904	14689	1	-2.0504	0.039337	0.039253	0.927685	863	0	-2.0504
Fundc2	5	0.05121	0.15529	0.95069	3379	3	-5.742	0.039337	0.039253	0.927685	864	0	-5.742
Rock1	5	0.19833	0.42296	0.996612	9005	3	-5.2152	0.039337	0.039253	0.927685	865	0	-5.2152
Usp46	5	0.11503	0.28447	0.980763	6220	2	-3.9368	0.039337	0.039253	0.927685	866	0	-3.9368
Nr2c1	5	0.73758	0.85361	0.999904	18831	2	-4.3674	0.039337	0.039253	0.927685	867	0	-4.3674
Clec11a	5	0.11423	0.28298	0.980763	6194	3	-5.4602	0.039337	0.039253	0.927685	868	0	-5.4602
Cfl2	5	0.24774	0.47589	0.998754	10365	2	-4.0204	0.039337	0.039253	0.927685	869	0	-4.0204
Wwp1	5	0.23803	0.46556	0.997696	10098	2	-1.7628	0.039337	0.039253	0.927685	870	0	-1.7628
Ubtd2	5	0.4792	0.70439	0.999904	15211	1	-3.411	0.039337	0.039253	0.927685	871	0	-3.411
Slc35a4	5	0.58026	0.76463	0.999904	16741	2	-2.9983	0.039337	0.039253	0.927685	872	0	-2.9983
Rcan3	5	0.3553	0.58603	0.999904	12905	1	-3.7059	0.039337	0.039253	0.927685	873	0	-3.7059
Cep68	5	0.40538	0.63511	0.999904	13868	3	-4.7688	0.039337	0.039253	0.927685	874	0	-4.7688
Stard3	5	0.1711	0.38396	0.992246	8182	4	-4.8718	0.039337	0.039253	0.927685	875	0	-4.8718
Cdr2	5	0.22403	0.45064	0.997696	9721	2	-3.8373	0.039337	0.039253	0.927685	876	0	-3.8373
Cldn24	5	0.09419	0.24448	0.974233	5353	1	-0.69412	0.039337	0.039253	0.927685	877	0	-0.69412
Ddx10	5	0.79133	0.88757	0.999904	19476	1	-4.218	0.039337	0.039253	0.927685	878	0	-4.218
Zfp955a	5	0.96532	0.96561	0.999904	21695	1	-3.0862	0.039337	0.039253	0.927685	879	0	-3.0862
Pex1	5	0.13829	0.32701	0.985188	7082	3	-5.1681	0.039337	0.039253	0.927685	880	0	-5.1681
Ap1m2	5	0.99166	0.9917	0.999904	22262	0	-2.9983	0.039337	0.039253	0.927685	881	0	-2.9983
Ppwd1	5	0.89721	0.92687	0.999904	20726	1	-3.3504	0.039337	0.039253	0.927685	882	0	-3.3504
Mfn2	5	0.16377	0.37156	0.991654	7934	3	-5.308	0.039337	0.039253	0.927685	883	0	-5.308
Med12	5	0.69521	0.82843	0.999904	18334	2	-4.363	0.039337	0.039253	0.927685	884	0	-4.363
C2	5	0.36834	0.59894	0.999904	13162	2	-2.9629	0.039337	0.039253	0.927685	885	0	-2.9629
Tnf	5	0.11777	0.28952	0.981574	6323	4	-4.8221	0.039337	0.039253	0.927685	886	0	-4.8221
Slc25a31	5	0.29206	0.52216	0.999197	11506	2	-2.3204	0.039337	0.039253	0.927685	887	0	-2.3204
Kctd13	5	0.99464	0.99464	0.999904	22342	0	-3.2408	0.039337	0.039253	0.927685	888	0	-3.2408
Cdx2	5	0.076151	0.20816	0.965372	4579	2	-3.6426	0.039337	0.039253	0.927685	889	0	-3.6426
Kcnab3	5	0.9137	0.93364	0.999904	20896	1	-2.9473	0.039337	0.039253	0.927685	890	0	-2.9473
Fam47e	5	0.17111	0.38397	0.992246	8184	3	-5.2869	0.039337	0.039253	0.927685	891	0	-5.2869
Ktn1	5	0.24069	0.46834	0.997935	10180	1	-1.868	0.039337	0.039253	0.927685	892	0	-1.868
Actl6b	5	0.021175	0.078271	0.909843	1654	4	-5.983	0.039337	0.039253	0.927685	893	0	-5.983
Brms1	5	0.6317	0.79245	0.999904	17502	1	-3.2237	0.039337	0.039253	0.927685	894	0	-3.2237
Nolc1	5	0.63621	0.79495	0.999904	17573	2	-4.3287	0.039337	0.039253	0.927685	895	0	-4.3287
Mafb	5	0.3604	0.59114	0.999904	12992	3	-4.8582	0.039337	0.039253	0.927685	896	0	-4.8582
Rmnd5b	5	0.96137	0.96217	0.999904	21623	1	-3.8127	0.039337	0.039253	0.927685	897	0	-3.8127
Spag11b	5	0.4605	0.68704	0.999904	14890	2	-4.218	0.039337	0.039253	0.927685	898	0	-4.218
Phyhipl	5	0.035042	0.11907	0.931052	2516	3	-5.47	0.039337	0.039253	0.927685	899	0	-5.47
Lekr1	5	0.69841	0.83027	0.999904	18367	1	-3.6227	0.039337	0.039253	0.927685	900	0	-3.6227
Pigl	5	0.10389	0.26327	0.980763	5770	1	-2.2209	0.039337	0.039253	0.927685	901	0	-2.2209
Scn2a1	5	0.082123	0.22042	0.967265	4852	3	-4.7882	0.039337	0.039253	0.927685	902	0	-4.7882
Orm2	5	0.73368	0.85119	0.999904	18776	2	-4.2713	0.039337	0.039253	0.927685	903	0	-4.2713
Olfr223	5	0.30765	0.53816	0.999904	11882	1	-3.6359	0.039337	0.039253	0.927685	904	0	-3.6359
Itga10	5	0.27138	0.5007	0.999197	10989	1	-2.5406	0.039337	0.039253	0.927685	905	0	-2.5406
Cdh17	5	0.58026	0.76463	0.999904	16742	2	-3.9679	0.039337	0.039253	0.927685	906	0	-3.9679
Lat2	5	0.73772	0.85368	0.999904	18833	1	-2.8438	0.039337	0.039253	0.927685	907	0	-2.8438
Tie1	5	0.10834	0.27186	0.980763	5966	1	-3.5361	0.039337	0.039253	0.927685	908	0	-3.5361
Myo7a	5	0.98206	0.98219	0.999904	22034	0	-2.5009	0.039337	0.039253	0.927685	909	0	-2.5009
Bcar3	5	0.61746	0.78468	0.999904	17300	2	-4.5002	0.039337	0.039253	0.927685	910	0	-4.5002
Fan1	5	0.08685	0.22997	0.971523	5053	2	-4.568	0.039337	0.039253	0.927685	911	0	-4.568
mmu-mir-466h	1	0.95909	0.9593	0.999904	21591	0	-0.69412	0.040907	0.040756	0.927685	912	0	-0.69412
Hbb-bt	1	0.95909	0.9593	0.999904	21592	0	-0.69412	0.040907	0.040756	0.927685	913	0	-0.69412
mmu-mir-8120	2	0.86639	0.86645	0.999904	20347	0	-2.2004	0.041678	0.041619	0.927685	914	0	-2.2004
Gm13242	2	0.047962	0.085656	0.919324	3221	1	-3.6417	0.041678	0.041619	0.927685	915	0	-3.6417
Peak1	2	0.92184	0.92187	0.999904	20993	0	-1.983	0.041678	0.041619	0.927685	916	0	-1.983
mmu-mir-3620	2	0.95937	0.95961	0.999904	21598	0	-1.7307	0.041678	0.041619	0.927685	917	0	-1.7307
Pcdha6	2	0.93968	0.93978	0.999904	21265	0	-1.878	0.041678	0.041619	0.927685	918	0	-1.878
mmu-mir-28b	2	0.14364	0.23607	0.971523	7276	1	-3.3779	0.041678	0.041619	0.927685	919	0	-3.3779
Zxdb	2	0.99931	0.99932	0.999942	22449	0	-0.40149	0.041678	0.041619	0.927685	920	0	-0.40149
Dsg1b	2	0.85951	0.85952	0.999904	20272	0	-2.2228	0.041678	0.041619	0.927685	921	0	-2.2228
Krtap6-1	2	0.99931	0.99932	0.999942	22450	0	-0.40149	0.041678	0.041619	0.927685	922	0	-0.40149
Pcdhgb7	2	0.98833	0.98837	0.999904	22182	0	-1.2512	0.041678	0.041619	0.927685	923	0	-1.2512
NonTargetingControlGuideForMouse_0417	1	0.9566	0.95675	0.999904	21537	0	-0.73621	0.043398	0.043315	0.927685	924	0	-0.73621
mmu-mir-3473b	1	0.9566	0.95675	0.999904	21536	0	-0.73621	0.043398	0.043315	0.927685	925	0	-0.73621
Gm2933	1	0.9566	0.95675	0.999904	21535	0	-0.73621	0.043398	0.043315	0.927685	926	0	-0.73621
Slxl1	1	0.95459	0.95471	0.999904	21498	0	-0.78079	0.045412	0.045374	0.927685	927	0	-0.78079
Trim54	6	0.15645	0.37274	0.991654	7688	3	-4.3462	0.047016	0.047212	0.927685	928	0	-4.3462
Ppp2r5b	6	0.37062	0.63681	0.999904	13208	2	-4.0306	0.047016	0.047212	0.927685	929	0	-4.0306
Glt8d2	6	0.12115	0.31959	0.984184	6450	4	-5.2595	0.047016	0.047212	0.927685	930	0	-5.2595
Dusp16	6	0.27213	0.52975	0.999826	11015	2	-2.6808	0.047016	0.047212	0.927685	931	0	-2.6808
Arsj	6	0.73473	0.87374	0.999904	18797	2	-3.5882	0.047016	0.047212	0.927685	932	0	-3.5882
Pfkfb4	6	0.59252	0.79849	0.999904	16921	3	-4.5302	0.047016	0.047212	0.927685	933	0	-4.5302
Rdh8	6	0.12361	0.32339	0.985049	6539	1	-2.1102	0.047016	0.047212	0.927685	934	0	-2.1102
Wdr86	6	0.40456	0.662	0.999904	13851	3	-4.5521	0.047016	0.047212	0.927685	935	0	-4.5521
Gzmf	6	0.044682	0.14887	0.946062	3050	4	-5.552	0.047016	0.047212	0.927685	936	0	-5.552
D8Ertd82e	6	0.58115	0.79026	0.999904	16760	2	-4.5147	0.047016	0.047212	0.927685	937	0	-4.5147
Ralgps2	6	0.12329	0.32288	0.985049	6523	3	-4.8148	0.047016	0.047212	0.927685	938	0	-4.8148
Sesn1	6	0.82417	0.9134	0.999904	19884	2	-2.4227	0.047016	0.047212	0.927685	939	0	-2.4227
Qdpr	6	0.20474	0.44119	0.996612	9192	3	-4.2682	0.047016	0.047212	0.927685	940	0	-4.2682
Carhsp1	6	0.15639	0.37265	0.991654	7684	2	-1.8394	0.047016	0.047212	0.927685	941	0	-1.8394
Mpc1	6	0.15564	0.37154	0.991654	7660	2	-3.0316	0.047016	0.047212	0.927685	942	0	-3.0316
Fbf1	6	0.10261	0.2867	0.980763	5719	3	-4.9462	0.047016	0.047212	0.927685	943	0	-4.9462
Ncdn	6	0.34345	0.6164	0.999904	12680	4	-4.5995	0.047016	0.047212	0.927685	944	0	-4.5995
Cd80	6	0.71508	0.86589	0.999904	18560	2	-3.7446	0.047016	0.047212	0.927685	945	0	-3.7446
Als2cr12	6	0.14966	0.36273	0.991654	7470	4	-5.0969	0.047016	0.047212	0.927685	946	0	-5.0969
H2-DMb1	6	0.0024389	0.012144	0.725682	263	5	-6.214	0.047016	0.047212	0.927685	947	0	-6.214
Spaca5	6	0.38448	0.64714	0.999904	13465	2	-4.1221	0.047016	0.047212	0.927685	948	0	-4.1221
Prkaca	6	0.87287	0.93847	0.999904	20420	1	-4.0384	0.047016	0.047212	0.927685	949	0	-4.0384
Tbc1d17	6	0.57983	0.7893	0.999904	16732	3	-4.3102	0.047016	0.047212	0.927685	950	0	-4.3102
B3galt6	6	0.2341	0.48062	0.999197	9983	3	-4.8441	0.047016	0.047212	0.927685	951	0	-4.8441
Chmp7	6	0.73247	0.8728	0.999904	18757	2	-4.0145	0.047016	0.047212	0.927685	952	0	-4.0145
Rhag	6	0.07323	0.21996	0.967265	4460	3	-4.9813	0.047016	0.047212	0.927685	953	0	-4.9813
Papolb	6	0.3203	0.58919	0.999904	12174	4	-4.7658	0.047016	0.047212	0.927685	954	0	-4.7658
Rasd2	6	0.61847	0.81693	0.999904	17314	2	-4.528	0.047016	0.047212	0.927685	955	0	-4.528
Ppp1ca	6	0.92695	0.95693	0.999904	21075	1	-2.9411	0.047016	0.047212	0.927685	956	0	-2.9411
Zfp72	6	0.23701	0.4845	0.999197	10066	4	-4.9935	0.047016	0.047212	0.927685	957	0	-4.9935
Ssr3	6	0.26476	0.52041	0.999197	10834	3	-4.3849	0.047016	0.047212	0.927685	958	0	-4.3849
Gm1110	6	0.84245	0.92244	0.999904	20098	2	-3.3354	0.047016	0.047212	0.927685	959	0	-3.3354
Tstd2	6	0.017542	0.072905	0.906307	1423	3	-4.9174	0.047016	0.047212	0.927685	960	0	-4.9174
Rpap3	6	0.060131	0.18831	0.955716	3848	3	-4.6979	0.047016	0.047212	0.927685	961	0	-4.6979
Apln	6	0.41379	0.6688	0.999904	14027	3	-4.395	0.047016	0.047212	0.927685	962	0	-4.395
Mtcp1	6	0.47327	0.71229	0.999904	15127	3	-4.3509	0.047016	0.047212	0.927685	963	0	-4.3509
Osgin1	6	0.31267	0.57998	0.999904	12002	1	-3.3424	0.047016	0.047212	0.927685	964	0	-3.3424
BC048562	6	0.35164	0.62268	0.999904	12821	3	-4.059	0.047016	0.047212	0.927685	965	0	-4.059
Mdga1	6	0.51705	0.74438	0.999904	15832	1	-3.4616	0.047016	0.047212	0.927685	966	0	-3.4616
Olfr51	6	0.092297	0.26387	0.980763	5275	5	-5.0181	0.047016	0.047212	0.927685	967	0	-5.0181
Pfdn5	6	0.25035	0.50175	0.999197	10428	4	-4.8203	0.047016	0.047212	0.927685	968	0	-4.8203
Mid2	6	0.045661	0.15146	0.947998	3107	2	-3.0145	0.047016	0.047212	0.927685	969	0	-3.0145
Hyal3	6	0.44273	0.69006	0.999904	14572	3	-4.4901	0.047016	0.047212	0.927685	970	0	-4.4901
Zfp13	6	0.28408	0.54471	0.999904	11305	4	-4.871	0.047016	0.047212	0.927685	971	0	-4.871
Col3a1	6	0.62159	0.8191	0.999904	17360	3	-3.7171	0.047016	0.047212	0.927685	972	0	-3.7171
Intu	6	0.051692	0.16711	0.95358	3402	3	-5.2002	0.047016	0.047212	0.927685	973	0	-5.2002
Csnk2b	6	0.83213	0.91729	0.999904	19976	2	-4.4321	0.047016	0.047212	0.927685	974	0	-4.4321
Angel2	6	0.417	0.67114	0.999904	14095	3	-3.624	0.047016	0.047212	0.927685	975	0	-3.624
Rad18	6	0.020491	0.081789	0.919324	1606	4	-5.5131	0.047016	0.047212	0.927685	976	0	-5.5131
Gm15455	6	0.41674	0.67096	0.999904	14088	2	-3.2748	0.047016	0.047212	0.927685	977	0	-3.2748
Dlst	6	0.70024	0.86004	0.999904	18394	1	-3.0338	0.047016	0.047212	0.927685	978	0	-3.0338
Zfp217	6	0.1429	0.35275	0.989893	7243	3	-4.3218	0.047016	0.047212	0.927685	979	0	-4.3218
Slc41a3	6	0.68735	0.85505	0.999904	18250	2	-2.8258	0.047016	0.047212	0.927685	980	0	-2.8258
Lrpap1	6	0.037122	0.12874	0.931052	2636	4	-5.5045	0.047016	0.047212	0.927685	981	0	-5.5045
Pin1	6	0.028079	0.1037	0.927535	2109	3	-3.3786	0.047016	0.047212	0.927685	982	0	-3.3786
Plin5	6	0.063116	0.1957	0.959284	3983	2	-1.1776	0.047016	0.047212	0.927685	983	0	-1.1776
Zbtb9	6	0.11253	0.3063	0.984117	6119	2	-4.2402	0.047016	0.047212	0.927685	984	0	-4.2402
Rgs20	6	0.71813	0.86711	0.999904	18601	1	-3.0152	0.047016	0.047212	0.927685	985	0	-3.0152
Pigp	6	0.55263	0.76988	0.999904	16345	2	-3.9772	0.047016	0.047212	0.927685	986	0	-3.9772
D10Wsu102e	6	0.39376	0.65408	0.999904	13641	3	-4.4519	0.047016	0.047212	0.927685	987	0	-4.4519
4833423E24Rik	6	0.032731	0.11675	0.931052	2392	4	-5.3216	0.047016	0.047212	0.927685	988	0	-5.3216
Loxl4	6	0.48064	0.71769	0.999904	15254	2	-3.1031	0.047016	0.047212	0.927685	989	0	-3.1031
Pcdh20	6	0.12262	0.32187	0.985049	6504	2	-3.2166	0.047016	0.047212	0.927685	990	0	-3.2166
Serpinb3a	6	0.45198	0.69681	0.999904	14722	3	-4.5118	0.047016	0.047212	0.927685	991	0	-4.5118
Olfr519	6	0.55702	0.77301	0.999904	16414	2	-2.9381	0.047016	0.047212	0.927685	992	0	-2.9381
Prpf38a	6	0.94872	0.96388	0.999904	21410	1	-2.6819	0.047016	0.047212	0.927685	993	0	-2.6819
1810065E05Rik	6	0.99113	0.99114	0.999904	22249	0	-3.3232	0.047016	0.047212	0.927685	994	0	-3.3232
Olfr1012	6	0.18367	0.41184	0.994281	8598	3	-3.1272	0.047016	0.047212	0.927685	995	0	-3.1272
Vmn2r123	6	0.20474	0.44119	0.996612	9193	3	-4.5802	0.047016	0.047212	0.927685	996	0	-4.5802
Selt	6	0.99985	0.99985	0.999942	22466	0	-3.0134	0.047016	0.047212	0.927685	997	0	-3.0134
Mrpl9	6	0.044288	0.14788	0.946062	3031	3	-3.7075	0.047016	0.047212	0.927685	998	0	-3.7075
2010109A12Rik	6	0.023953	0.091959	0.920454	1824	2	-2.6619	0.047016	0.047212	0.927685	999	0	-2.6619
Kbtbd7	6	0.76334	0.88574	0.999904	19125	2	-3.5866	0.047016	0.047212	0.927685	1000	0	-3.5866
Shc3	6	0.4629	0.70472	0.999904	14925	3	-4.6018	0.047016	0.047212	0.927685	1001	0	-4.6018
Fgfr4	6	0.42641	0.6781	0.999904	14287	2	-3.0524	0.047016	0.047212	0.927685	1002	0	-3.0524
Top1mt	6	0.25666	0.51004	0.999197	10610	3	-4.0601	0.047016	0.047212	0.927685	1003	0	-4.0601
Olfr211	6	0.51639	0.74388	0.999904	15824	3	-4.6454	0.047016	0.047212	0.927685	1004	0	-4.6454
Trim56	6	0.13719	0.34413	0.989156	7040	4	-4.947	0.047016	0.047212	0.927685	1005	0	-4.947
Hnrnpa3	6	0.91622	0.9542	0.999904	20925	1	-3.2555	0.047016	0.047212	0.927685	1006	0	-3.2555
Fbxw18	6	0.41538	0.66996	0.999904	14063	2	-4.0509	0.047016	0.047212	0.927685	1007	0	-4.0509
2410015M20Rik	6	0.26997	0.52707	0.999197	10957	2	-3.8996	0.047016	0.047212	0.927685	1008	0	-3.8996
Prf1	6	0.013894	0.060463	0.899111	1175	5	-5.5974	0.047016	0.047212	0.927685	1009	0	-5.5974
Tob2	6	0.018543	0.075908	0.909843	1484	3	-5.3404	0.047016	0.047212	0.927685	1010	0	-5.3404
Tmem200b	6	0.77761	0.892	0.999904	19307	1	-2.3829	0.047016	0.047212	0.927685	1011	0	-2.3829
Rgs5	6	0.64426	0.835	0.999904	17699	1	-3.3007	0.047016	0.047212	0.927685	1012	0	-3.3007
Sez6l2	6	0.1211	0.31953	0.984117	6448	3	-3.5233	0.047016	0.047212	0.927685	1013	0	-3.5233
Olfr1384	6	0.37784	0.6422	0.999904	13347	3	-4.5843	0.047016	0.047212	0.927685	1014	0	-4.5843
Lrp2bp	6	0.094047	0.26777	0.980763	5346	4	-5.1653	0.047016	0.047212	0.927685	1015	0	-5.1653
Vmn2r114	6	0.20425	0.44053	0.996612	9178	4	-4.916	0.047016	0.047212	0.927685	1016	0	-4.916
Dhcr7	6	0.025924	0.097587	0.920454	1962	5	-5.3615	0.047016	0.047212	0.927685	1017	0	-5.3615
Barhl1	6	0.051413	0.16638	0.953043	3387	3	-4.8784	0.047016	0.047212	0.927685	1018	0	-4.8784
Mpp7	6	0.17491	0.39953	0.994281	8316	3	-4.6275	0.047016	0.047212	0.927685	1019	0	-4.6275
Eva1a	6	0.88367	0.94451	0.999904	20556	1	-2.9398	0.047016	0.047212	0.927685	1020	0	-2.9398
Hilpda	6	0.15522	0.37093	0.991654	7646	3	-4.7102	0.047016	0.047212	0.927685	1021	0	-4.7102
Fbxo47	6	0.62911	0.82434	0.999904	17459	2	-3.5927	0.047016	0.047212	0.927685	1022	0	-3.5927
Vmn1r212	6	0.5052	0.73565	0.999904	15671	3	-4.5077	0.047016	0.047212	0.927685	1023	0	-4.5077
Asic4	6	0.42138	0.67438	0.999904	14184	2	-3.0327	0.047016	0.047212	0.927685	1024	0	-3.0327
Whrn	6	0.70006	0.85997	0.999904	18391	2	-4.4898	0.047016	0.047212	0.927685	1025	0	-4.4898
Zdhhc16	6	0.34889	0.62064	0.999904	12768	3	-4.497	0.047016	0.047212	0.927685	1026	0	-4.497
Tmem165	6	0.062424	0.19402	0.957921	3960	5	-5.3033	0.047016	0.047212	0.927685	1027	0	-5.3033
Anks3	6	0.18613	0.41534	0.994281	8681	3	-4.7026	0.047016	0.047212	0.927685	1028	0	-4.7026
Slc10a5	6	0.6962	0.85846	0.999904	18347	2	-4.0437	0.047016	0.047212	0.927685	1029	0	-4.0437
A430005L14Rik	6	0.9392	0.96059	0.999904	21258	1	-3.5788	0.047016	0.047212	0.927685	1030	0	-3.5788
Olfr342	6	0.1227	0.32198	0.985049	6506	3	-4.8641	0.047016	0.047212	0.927685	1031	0	-4.8641
Tdrd3	6	0.21872	0.46012	0.997696	9577	2	-3.9313	0.047016	0.047212	0.927685	1032	0	-3.9313
Mrpl19	6	0.46877	0.70904	0.999904	15038	3	-3.943	0.047016	0.047212	0.927685	1033	0	-3.943
Slc1a3	6	0.39768	0.65692	0.999904	13713	3	-4.7414	0.047016	0.047212	0.927685	1034	0	-4.7414
Fgfbp3	6	0.59441	0.79985	0.999904	16953	3	-4.4623	0.047016	0.047212	0.927685	1035	0	-4.4623
Mlxipl	6	0.98202	0.98226	0.999904	22032	1	-3.0076	0.047016	0.047212	0.927685	1036	0	-3.0076
Gm5127	6	0.40374	0.6614	0.999904	13835	2	-4.1461	0.047016	0.047212	0.927685	1037	0	-4.1461
Dcp2	6	0.11155	0.30476	0.984117	6081	2	-3.2437	0.047016	0.047212	0.927685	1038	0	-3.2437
6430573F11Rik	6	0.9784	0.97929	0.999904	21959	1	-3.9442	0.047016	0.047212	0.927685	1039	0	-3.9442
Tmem233	6	0.17305	0.39688	0.994281	8253	3	-4.55	0.047016	0.047212	0.927685	1040	0	-4.55
Bcas1	6	0.76663	0.88716	0.999904	19176	2	-3.6672	0.047016	0.047212	0.927685	1041	0	-3.6672
Olfr154	6	0.82608	0.91432	0.999904	19906	2	-4.4647	0.047016	0.047212	0.927685	1042	0	-4.4647
Cpa1	6	0.026099	0.098084	0.921501	1975	4	-5.4124	0.047016	0.047212	0.927685	1043	0	-5.4124
Spata13	6	0.99353	0.99356	0.999904	22314	0	-3.3172	0.047016	0.047212	0.927685	1044	0	-3.3172
Hephl1	6	0.13902	0.3469	0.98953	7105	3	-4.2593	0.047016	0.047212	0.927685	1045	0	-4.2593
Sertad3	6	0.11977	0.31751	0.984117	6406	3	-4.8006	0.047016	0.047212	0.927685	1046	0	-4.8006
Olfr536	6	0.13931	0.34734	0.98953	7118	4	-5.2198	0.047016	0.047212	0.927685	1047	0	-5.2198
Kap	6	0.27272	0.53049	0.999904	11022	2	-2.9274	0.047016	0.047212	0.927685	1048	0	-2.9274
Dok5	6	0.97064	0.97403	0.999904	21783	1	-3.4653	0.047016	0.047212	0.927685	1049	0	-3.4653
Ipmk	6	0.53019	0.75386	0.999904	16011	2	-3.2491	0.047016	0.047212	0.927685	1050	0	-3.2491
Cacng8	6	0.54805	0.76662	0.999904	16281	1	-3.084	0.047016	0.047212	0.927685	1051	0	-3.084
Purb	6	0.2534	0.50584	0.999197	10527	3	-4.5996	0.047016	0.047212	0.927685	1052	0	-4.5996
Dtx2	6	0.080495	0.2369	0.971523	4774	4	-5.1603	0.047016	0.047212	0.927685	1053	0	-5.1603
Ppp2r3c	6	0.63372	0.82759	0.999904	17533	1	-3.4681	0.047016	0.047212	0.927685	1054	0	-3.4681
Gm8298	6	0.79206	0.89839	0.999904	19487	1	-2.9065	0.047016	0.047212	0.927685	1055	0	-2.9065
B3galnt2	6	0.38699	0.64906	0.999904	13506	3	-4.1642	0.047016	0.047212	0.927685	1056	0	-4.1642
Dixdc1	6	0.33225	0.60339	0.999904	12441	4	-4.6237	0.047016	0.047212	0.927685	1057	0	-4.6237
Mtl5	6	0.87913	0.94195	0.999904	20505	2	-1.7899	0.047016	0.047212	0.927685	1058	0	-1.7899
Tcap	6	0.59676	0.80154	0.999904	16991	1	-3.8386	0.047016	0.047212	0.927685	1059	0	-3.8386
Ccdc42	6	0.06039	0.18896	0.956538	3861	4	-5.2796	0.047016	0.047212	0.927685	1060	0	-5.2796
C2cd2l	6	0.80208	0.9029	0.999904	19622	2	-3.3806	0.047016	0.047212	0.927685	1061	0	-3.3806
Asap1	6	0.34202	0.61475	0.999904	12649	2	-2.4314	0.047016	0.047212	0.927685	1062	0	-2.4314
Exosc2	6	0.99795	0.99796	0.999942	22413	0	-2.3293	0.047016	0.047212	0.927685	1063	0	-2.3293
4933425L06Rik	6	0.071663	0.21621	0.966362	4397	3	-4.2496	0.047016	0.047212	0.927685	1064	0	-4.2496
Vmn2r1	6	0.97856	0.97942	0.999904	21962	1	-2.3294	0.047016	0.047212	0.927685	1065	0	-2.3294
Notch2	6	0.68833	0.85543	0.999904	18259	2	-2.7946	0.047016	0.047212	0.927685	1066	0	-2.7946
Exoc1	6	0.032581	0.11633	0.931052	2389	5	-5.5854	0.047016	0.047212	0.927685	1067	0	-5.5854
Jph3	6	0.74113	0.87634	0.999904	18873	2	-4.0773	0.047016	0.047212	0.927685	1068	0	-4.0773
Usp10	6	0.14006	0.34848	0.989893	7154	3	-4.1871	0.047016	0.047212	0.927685	1069	0	-4.1871
Wwox	6	0.20791	0.44548	0.997696	9281	4	-4.994	0.047016	0.047212	0.927685	1070	0	-4.994
Izumo2	6	0.26838	0.52508	0.999197	10918	1	-3.0775	0.047016	0.047212	0.927685	1071	0	-3.0775
Timmdc1	6	0.9256	0.95655	0.999904	21052	1	-3.2026	0.047016	0.047212	0.927685	1072	0	-3.2026
Gipc1	6	0.54222	0.76248	0.999904	16205	1	-4.2288	0.047016	0.047212	0.927685	1073	0	-4.2288
1700110M21Rik	6	0.17948	0.40598	0.994281	8461	2	-2.0517	0.047016	0.047212	0.927685	1074	0	-2.0517
Cpsf3	6	0.30756	0.57379	0.999904	11881	3	-4.007	0.047016	0.047212	0.927685	1075	0	-4.007
Galnt5	6	0.16127	0.37984	0.991903	7857	2	-3.984	0.047016	0.047212	0.927685	1076	0	-3.984
Sash1	6	0.90418	0.95134	0.999904	20803	1	-3.0255	0.047016	0.047212	0.927685	1077	0	-3.0255
mmu-mir-7037	3	0.99722	0.99725	0.999942	22397	0	-1.8017	0.050686	0.050815	0.927685	1078	0	-1.8017
Eif2s1	3	0.019318	0.049917	0.883094	1534	1	-4.3108	0.050686	0.050815	0.927685	1079	0	-4.3108
Vax2	3	0.92491	0.92502	0.999904	21035	0	-0.56434	0.050686	0.050815	0.927685	1080	0	-0.56434
4932411N23Rik	3	0.26657	0.41811	0.994281	10883	1	-3.9087	0.050686	0.050815	0.927685	1081	0	-3.9087
Usmg5	3	0.38135	0.53635	0.999904	13401	1	-4.1438	0.050686	0.050815	0.927685	1082	0	-4.1438
Olfr1333	3	0.83288	0.83682	0.999904	19983	1	-4.4793	0.050686	0.050815	0.927685	1083	0	-4.4793
mmu-mir-7030	3	0.67086	0.732	0.999904	18067	1	-1.5837	0.050686	0.050815	0.927685	1084	0	-1.5837
Slc26a10	3	0.82473	0.83018	0.999904	19897	1	-3.2713	0.050686	0.050815	0.927685	1085	0	-3.2713
mmu-mir-3470a	1	0.9492	0.9494	0.999904	21416	0	-0.80395	0.050801	0.050802	0.927685	1086	0	-0.80395
Aldoa	4	0.34896	0.55991	0.999904	12770	1	-3.502	0.050942	0.050944	0.927685	1087	0	-3.502
Rbfox3	4	0.93394	0.93395	0.999904	21175	1	-3.4323	0.050942	0.050944	0.927685	1088	0	-3.4323
Gale	4	0.12473	0.27495	0.980763	6571	2	-4.9635	0.050942	0.050944	0.927685	1089	0	-4.9635
Arpc4	4	0.64586	0.78125	0.999904	17713	2	-3.697	0.050942	0.050944	0.927685	1090	0	-3.697
Rps14	4	0.45543	0.63684	0.999904	14802	2	-3.7709	0.050942	0.050944	0.927685	1091	0	-3.7709
Aim2	4	0.79178	0.84984	0.999904	19483	1	-2.4243	0.050942	0.050944	0.927685	1092	0	-2.4243
Wdr55	4	0.93207	0.93216	0.999904	21149	1	-3.0826	0.050942	0.050944	0.927685	1093	0	-3.0826
Olfr656	4	0.0059186	0.020487	0.859951	518	3	-6.136	0.050942	0.050944	0.927685	1094	0	-6.136
Slc6a20a	4	0.98122	0.98126	0.999904	22013	0	-3.5541	0.050942	0.050944	0.927685	1095	0	-3.5541
Cops6	4	0.65218	0.78618	0.999904	17811	2	-4.2917	0.050942	0.050944	0.927685	1096	0	-4.2917
Bend6	4	0.88886	0.89874	0.999904	20627	1	-3.3058	0.050942	0.050944	0.927685	1097	0	-3.3058
Mocs1	4	0.65195	0.78598	0.999904	17802	2	-4.3446	0.050942	0.050944	0.927685	1098	0	-4.3446
Dnah7b	4	0.5316	0.69351	0.999904	16038	1	-3.5534	0.050942	0.050944	0.927685	1099	0	-3.5534
Tnfsf11	4	0.16086	0.32912	0.985934	7847	1	-3.4434	0.050942	0.050944	0.927685	1100	0	-3.4434
Capn13	4	0.35981	0.56766	0.999904	12980	2	-4.3028	0.050942	0.050944	0.927685	1101	0	-4.3028
Psg27	4	0.33132	0.54725	0.999904	12414	2	-4.9314	0.050942	0.050944	0.927685	1102	0	-4.9314
Cxcr1	4	0.8668	0.88544	0.999904	20354	1	-3.1713	0.050942	0.050944	0.927685	1103	0	-3.1713
Mrpl42	4	0.038646	0.11533	0.931052	2729	2	-3.2704	0.050942	0.050944	0.927685	1104	0	-3.2704
Gabrp	4	0.32045	0.53954	0.999904	12187	1	-2.7996	0.050942	0.050944	0.927685	1105	0	-2.7996
Pcf11	4	0.55276	0.70937	0.999904	16350	1	-3.7178	0.050942	0.050944	0.927685	1106	0	-3.7178
Psma4	4	0.17743	0.35304	0.9899	8397	1	-2.2509	0.050942	0.050944	0.927685	1107	0	-2.2509
Zyx	4	0.098672	0.23445	0.971523	5543	1	-2.6723	0.050942	0.050944	0.927685	1108	0	-2.6723
Sun3	4	0.3156	0.53612	0.999904	12068	2	-4.1454	0.050942	0.050944	0.927685	1109	0	-4.1454
Ifna4	4	0.87279	0.88893	0.999904	20415	1	-3.5829	0.050942	0.050944	0.927685	1110	0	-3.5829
Sell	4	0.24248	0.44343	0.997647	10226	2	-4.908	0.050942	0.050944	0.927685	1111	0	-4.908
Rmi1	4	0.031006	0.094793	0.920454	2302	3	-5.9627	0.050942	0.050944	0.927685	1112	0	-5.9627
Gatad1	4	0.35479	0.56409	0.999904	12892	2	-3.4267	0.050942	0.050944	0.927685	1113	0	-3.4267
Lrrc29	4	0.61787	0.75953	0.999904	17305	2	-4.3071	0.050942	0.050944	0.927685	1114	0	-4.3071
Gnb1l	4	0.99682	0.99685	0.999942	22391	0	-2.5925	0.050942	0.050944	0.927685	1115	0	-2.5925
Peg12	4	0.73869	0.83006	0.999904	18842	1	-2.6596	0.050942	0.050944	0.927685	1116	0	-2.6596
Bricd5	4	0.12427	0.27424	0.980763	6560	2	-5.0919	0.050942	0.050944	0.927685	1117	0	-5.0919
Gm527	4	0.99747	0.99747	0.999942	22403	0	-2.7579	0.050942	0.050944	0.927685	1118	0	-2.7579
3300002I08Rik	4	0.1423	0.3016	0.984117	7216	2	-3.8436	0.050942	0.050944	0.927685	1119	0	-3.8436
Trappc5	4	0.9857	0.98571	0.999904	22111	0	-3.1057	0.050942	0.050944	0.927685	1120	0	-3.1057
Ripk4	4	0.81146	0.8581	0.999904	19751	1	-3.2415	0.050942	0.050944	0.927685	1121	0	-3.2415
2410141K09Rik	4	0.90192	0.9076	0.999904	20773	1	-3.1219	0.050942	0.050944	0.927685	1122	0	-3.1219
Trak1	4	0.4166	0.60859	0.999904	14085	2	-3.7236	0.050942	0.050944	0.927685	1123	0	-3.7236
Mxi1	4	0.35066	0.56113	0.999904	12808	1	-4.0267	0.050942	0.050944	0.927685	1124	0	-4.0267
Pgr	4	0.57156	0.72356	0.999904	16616	1	-4.2025	0.050942	0.050944	0.927685	1125	0	-4.2025
Kank4	4	0.42688	0.6161	0.999904	14294	1	-3.7416	0.050942	0.050944	0.927685	1126	0	-3.7416
Hist1h2ad	4	0.095378	0.22931	0.971523	5410	1	-1.828	0.050942	0.050944	0.927685	1127	0	-1.828
Tmem167	4	0.98614	0.98618	0.999904	22119	0	-2.1617	0.050942	0.050944	0.927685	1128	0	-2.1617
Dhx15	4	0.4835	0.65758	0.999904	15300	2	-2.797	0.050942	0.050944	0.927685	1129	0	-2.797
Naa25	4	0.88886	0.89874	0.999904	20629	1	-1.4373	0.050942	0.050944	0.927685	1130	0	-1.4373
Rnf112	4	0.41349	0.60635	0.999904	14023	1	-3.6251	0.050942	0.050944	0.927685	1131	0	-3.6251
Lmo7	4	0.2913	0.50725	0.999197	11494	2	-4.4297	0.050942	0.050944	0.927685	1132	0	-4.4297
Hyi	4	0.25898	0.46553	0.997696	10665	1	-1.2287	0.050942	0.050944	0.927685	1133	0	-1.2287
Lhx5	4	0.090739	0.22189	0.968227	5219	1	-2.2108	0.050942	0.050944	0.927685	1134	0	-2.2108
Ranbp6	4	0.84824	0.87537	0.999904	20161	1	-3.1572	0.050942	0.050944	0.927685	1135	0	-3.1572
Sdhc	4	0.16905	0.34098	0.988714	8117	1	-2.143	0.050942	0.050944	0.927685	1136	0	-2.143
D1Pas1	4	0.087756	0.21711	0.966415	5080	2	-4.4094	0.050942	0.050944	0.927685	1137	0	-4.4094
Tada2a	4	0.23429	0.43246	0.996612	9991	3	-4.9493	0.050942	0.050944	0.927685	1138	0	-4.9493
Unc119b	4	0.069239	0.18671	0.955716	4278	3	-5.5786	0.050942	0.050944	0.927685	1139	0	-5.5786
Cse1l	4	0.94339	0.94332	0.999904	21318	0	-2.6366	0.050942	0.050944	0.927685	1140	0	-2.6366
4930596D02Rik	4	0.22879	0.42493	0.996612	9841	2	-4.6889	0.050942	0.050944	0.927685	1141	0	-4.6889
Mrpl4	4	0.25208	0.45631	0.997696	10482	2	-4.008	0.050942	0.050944	0.927685	1142	0	-4.008
Ptplad2	4	0.13359	0.28839	0.981457	6919	2	-2.8736	0.050942	0.050944	0.927685	1143	0	-2.8736
4933415F23Rik	4	0.93652	0.93643	0.999904	21209	1	-3.1127	0.050942	0.050944	0.927685	1144	0	-3.1127
Rpl21	4	0.97958	0.97971	0.999904	21977	0	-0.99202	0.050942	0.050944	0.927685	1145	0	-0.99202
Cdk2ap1	4	0.25505	0.46025	0.997696	10564	3	-4.8255	0.050942	0.050944	0.927685	1146	0	-4.8255
Ptprg	4	0.053612	0.15375	0.950325	3501	3	-5.5855	0.050942	0.050944	0.927685	1147	0	-5.5855
Pacsin3	4	0.82737	0.86528	0.999904	19925	1	-3.2451	0.050942	0.050944	0.927685	1148	0	-3.2451
Fam159b	4	0.98325	0.98328	0.999904	22068	0	-3.6137	0.050942	0.050944	0.927685	1149	0	-3.6137
Wipf2	4	0.10492	0.24428	0.974233	5812	3	-5.4839	0.050942	0.050944	0.927685	1150	0	-5.4839
Ccdc108	4	0.63578	0.77325	0.999904	17568	1	-3.6417	0.050942	0.050944	0.927685	1151	0	-3.6417
Lrrcc1	4	0.23346	0.43133	0.996612	9967	1	-3.0295	0.050942	0.050944	0.927685	1152	0	-3.0295
Gpr111	4	0.64295	0.77892	0.999904	17682	1	-3.5431	0.050942	0.050944	0.927685	1153	0	-3.5431
Col2a1	4	0.40265	0.59852	0.999904	13815	2	-2.9451	0.050942	0.050944	0.927685	1154	0	-2.9451
Vmn1r231	4	0.022332	0.070518	0.906307	1714	2	-4.1991	0.050942	0.050944	0.927685	1155	0	-4.1991
Vmn2r109	4	0.98645	0.98648	0.999904	22134	0	-3.1388	0.050942	0.050944	0.927685	1156	0	-3.1388
Slc25a18	4	0.29255	0.50879	0.999197	11537	3	-4.8643	0.050942	0.050944	0.927685	1157	0	-4.8643
Gtf2h4	4	0.9095	0.91318	0.999904	20852	1	-2.8362	0.050942	0.050944	0.927685	1158	0	-2.8362
Krt33b	4	0.4022	0.59822	0.999904	13804	1	-4.0585	0.050942	0.050944	0.927685	1159	0	-4.0585
Hagh	4	0.60013	0.74569	0.999904	17035	2	-4.0772	0.050942	0.050944	0.927685	1160	0	-4.0772
Myh3	4	0.99436	0.99438	0.999904	22335	0	-0.81474	0.050942	0.050944	0.927685	1161	0	-0.81474
Dpysl3	4	0.99277	0.9928	0.999904	22291	0	-1.7442	0.050942	0.050944	0.927685	1162	0	-1.7442
Aggf1	4	0.073405	0.1936	0.957921	4463	3	-5.5609	0.050942	0.050944	0.927685	1163	0	-5.5609
Ftmt	4	0.2722	0.48276	0.999197	11016	1	-3.6566	0.050942	0.050944	0.927685	1164	0	-3.6566
Gm561	4	0.34122	0.55435	0.999904	12631	2	-3.2946	0.050942	0.050944	0.927685	1165	0	-3.2946
Tpsg1	4	0.094426	0.22782	0.971523	5360	2	-5.1792	0.050942	0.050944	0.927685	1166	0	-5.1792
Samd4	4	0.71809	0.82323	0.999904	18596	1	-1.8928	0.050942	0.050944	0.927685	1167	0	-1.8928
Chd7	4	0.54808	0.70581	0.999904	16282	2	-3.4251	0.050942	0.050944	0.927685	1168	0	-3.4251
Arhgap21	4	0.93345	0.9335	0.999904	21167	1	-2.3877	0.050942	0.050944	0.927685	1169	0	-2.3877
Tagln2	4	0.92982	0.93012	0.999904	21119	1	-3.3301	0.050942	0.050944	0.927685	1170	0	-3.3301
Rhox3g	4	0.0388	0.11572	0.931052	2737	2	-4.9978	0.050942	0.050944	0.927685	1171	0	-4.9978
Zdhhc17	4	0.60887	0.7525	0.999904	17174	1	-3.1733	0.050942	0.050944	0.927685	1172	0	-3.1733
Sgol1	4	0.64233	0.77846	0.999904	17671	1	-1.9902	0.050942	0.050944	0.927685	1173	0	-1.9902
Col27a1	4	0.67034	0.80039	0.999904	18056	1	-3.5976	0.050942	0.050944	0.927685	1174	0	-3.5976
Olfr979	4	0.99923	0.99921	0.999942	22446	0	-2.5486	0.050942	0.050944	0.927685	1175	0	-2.5486
Clasp2	4	0.38006	0.5822	0.999904	13381	2	-4.4393	0.050942	0.050944	0.927685	1176	0	-4.4393
Zfp668	4	0.51378	0.68012	0.999904	15791	2	-4.4175	0.050942	0.050944	0.927685	1177	0	-4.4175
Tnxb	4	0.12149	0.26995	0.980763	6462	3	-4.9962	0.050942	0.050944	0.927685	1178	0	-4.9962
2010107G23Rik	4	0.59691	0.74316	0.999904	16996	2	-3.9756	0.050942	0.050944	0.927685	1179	0	-3.9756
Phykpl	4	0.26234	0.46998	0.997935	10773	2	-4.7551	0.050942	0.050944	0.927685	1180	0	-4.7551
Cox15	4	0.14549	0.30627	0.984117	7347	3	-5.2009	0.050942	0.050944	0.927685	1181	0	-5.2009
A630095E13Rik	4	0.60013	0.74569	0.999904	17037	2	-4.3987	0.050942	0.050944	0.927685	1182	0	-4.3987
Myo1c	4	0.90138	0.90723	0.999904	20761	1	-3.3904	0.050942	0.050944	0.927685	1183	0	-3.3904
Ube2a	4	0.9713	0.9713	0.999904	21802	0	-3.9539	0.050942	0.050944	0.927685	1184	0	-3.9539
Slc30a1	4	0.58028	0.73028	0.999904	16744	2	-3.7043	0.050942	0.050944	0.927685	1185	0	-3.7043
Dera	4	0.48806	0.6609	0.999904	15395	2	-4.7881	0.050942	0.050944	0.927685	1186	0	-4.7881
Olfr437	4	0.010875	0.036444	0.868407	932	3	-5.9998	0.050942	0.050944	0.927685	1187	0	-5.9998
Fgf3	4	0.92516	0.92598	0.999904	21044	1	-4.429	0.050942	0.050944	0.927685	1188	0	-4.429
Bcl2a1b	4	0.76509	0.83952	0.999904	19149	1	-3.5433	0.050942	0.050944	0.927685	1189	0	-3.5433
2210407C18Rik	4	0.93509	0.93506	0.999904	21188	1	-3.0019	0.050942	0.050944	0.927685	1190	0	-3.0019
Cdk15	4	0.24375	0.44516	0.997696	10262	2	-4.5414	0.050942	0.050944	0.927685	1191	0	-4.5414
1700071K01Rik	4	0.14347	0.30329	0.984117	7271	2	-4.8233	0.050942	0.050944	0.927685	1192	0	-4.8233
Nfyb	4	0.98614	0.98618	0.999904	22118	0	-1.7422	0.050942	0.050944	0.927685	1193	0	-1.7422
Bdp1	4	0.063643	0.17735	0.955171	4013	3	-5.4217	0.050942	0.050944	0.927685	1194	0	-5.4217
Lace1	4	0.97287	0.97292	0.999904	21842	0	-3.5134	0.050942	0.050944	0.927685	1195	0	-3.5134
Atp6v0c	4	0.73161	0.82763	0.999904	18752	1	-2.1601	0.050942	0.050944	0.927685	1196	0	-2.1601
Emx2	4	0.037461	0.11222	0.930147	2660	3	-5.6515	0.050942	0.050944	0.927685	1197	0	-5.6515
Mypn	4	0.58241	0.73189	0.999904	16774	2	-3.8602	0.050942	0.050944	0.927685	1198	0	-3.8602
Hpgd	4	0.26854	0.47794	0.999197	10924	2	-4.8267	0.050942	0.050944	0.927685	1199	0	-4.8267
Rarres2	4	0.048376	0.14055	0.943457	3246	3	-5.6136	0.050942	0.050944	0.927685	1200	0	-5.6136
Agpat4	4	0.15359	0.31835	0.984117	7596	3	-5.2075	0.050942	0.050944	0.927685	1201	0	-5.2075
NonTargetingControlGuideForMouse_0878	1	0.94873	0.94892	0.999904	21411	0	-0.85727	0.051269	0.05127	0.927685	1202	0	-0.85727
NonTargetingControlGuideForMouse_0500	1	0.94867	0.94887	0.999904	21406	0	-0.93109	0.051326	0.05133	0.927685	1203	0	-0.93109
C030046E11Rik	2	0.68802	0.69149	0.999904	18256	1	-2.606	0.051814	0.05173	0.927685	1204	0	-2.606
mmu-mir-6369	2	0.66662	0.67257	0.999904	18003	1	-2.6391	0.051814	0.05173	0.927685	1205	0	-2.6391
Slx	2	0.43977	0.50139	0.999197	14501	1	-2.9533	0.051814	0.05173	0.927685	1206	0	-2.9533
Vmn2r36	2	0.60678	0.62294	0.999904	17134	1	-2.7286	0.051814	0.05173	0.927685	1207	0	-2.7286
mmu-mir-468	2	0.73937	0.73952	0.999904	18852	1	-2.5141	0.051814	0.05173	0.927685	1208	0	-2.5141
Tyms	2	0.053838	0.095574	0.920454	3510	1	-3.7046	0.059349	0.059238	0.927685	1209	0	-3.7046
Wbp11	2	0.57941	0.60161	0.999904	16723	1	-2.843	0.059349	0.059238	0.927685	1210	0	-2.843
Ptpmt1	3	0.24927	0.39995	0.994281	10404	1	-2.8728	0.061861	0.061962	0.927685	1211	0	-2.8728
mmu-mir-6348	3	0.095897	0.21296	0.96562	5428	2	-5.7416	0.061861	0.061962	0.927685	1212	0	-5.7416
Msx2	3	0.70209	0.74907	0.999904	18415	1	-2.517	0.061861	0.061962	0.927685	1213	0	-2.517
Mthfs	3	0.013229	0.034937	0.868407	1120	2	-6.4188	0.061861	0.061962	0.927685	1214	0	-6.4188
Mtbp	3	0.68323	0.73863	0.999904	18190	1	-0.97586	0.061861	0.061962	0.927685	1215	0	-0.97586
mmu-mir-1982	3	0.77636	0.79479	0.999904	19294	1	-4.0586	0.061861	0.061962	0.927685	1216	0	-4.0586
mmu-mir-339	3	0.45653	0.6116	0.999904	14827	2	-4.6846	0.061861	0.061962	0.927685	1217	0	-4.6846
Eif1a	3	0.62222	0.70783	0.999904	17373	1	-3.2418	0.061861	0.061962	0.927685	1218	0	-3.2418
mmu-mir-6416	3	0.45946	0.61451	0.999904	14878	2	-4.68	0.061861	0.061962	0.927685	1219	0	-4.68
Ppat	3	0.85304	0.85423	0.999904	20217	1	-1.5797	0.061861	0.061962	0.927685	1220	0	-1.5797
Rpl27	3	0.99221	0.99233	0.999904	22274	0	-2.114	0.061861	0.061962	0.927685	1221	0	-2.114
Zbtb42	3	0.75091	0.77822	0.999904	18985	1	-4.3154	0.061861	0.061962	0.927685	1222	0	-4.3154
mmu-mir-6967	3	0.99321	0.99335	0.999904	22304	0	-2.3204	0.061861	0.061962	0.927685	1223	0	-2.3204
Ywhae	3	0.97648	0.97662	0.999904	21921	0	-1.8713	0.061861	0.061962	0.927685	1224	0	-1.8713
Cers3	3	0.1782	0.32468	0.985049	8416	2	-5.4268	0.061861	0.061962	0.927685	1225	0	-5.4268
Grb2	3	0.99321	0.99335	0.999904	22305	0	-0.97357	0.061861	0.061962	0.927685	1226	0	-0.97357
mmu-mir-6911	3	0.93594	0.93611	0.999904	21199	0	-3.5426	0.061861	0.061962	0.927685	1227	0	-3.5426
Uba1	3	0.080318	0.18258	0.955716	4765	1	-3.0738	0.061861	0.061962	0.927685	1228	0	-3.0738
Snrpb	3	0.99762	0.99765	0.999942	22407	0	-0.69412	0.061861	0.061962	0.927685	1229	0	-0.69412
Six4	3	0.85359	0.85473	0.999904	20221	1	-2.9452	0.061861	0.061962	0.927685	1230	0	-2.9452
mmu-mir-7082	3	0.73108	0.76596	0.999904	18745	1	-4.2206	0.061861	0.061962	0.927685	1231	0	-4.2206
Nhlh1	3	0.93885	0.93907	0.999904	21249	0	-3.8809	0.061861	0.061962	0.927685	1232	0	-3.8809
Gm13826	3	0.55202	0.67607	0.999904	16337	1	-4.3201	0.061861	0.061962	0.927685	1233	0	-4.3201
Hnrnpk	3	0.94598	0.94621	0.999904	21357	0	-2.3204	0.061861	0.061962	0.927685	1234	0	-2.3204
Zrsr2	3	0.73543	0.76858	0.999904	18806	1	-4.2074	0.061861	0.061962	0.927685	1235	0	-4.2074
mmu-mir-3473c	3	0.75196	0.77887	0.999904	18997	1	-4.3674	0.061861	0.061962	0.927685	1236	0	-4.3674
mmu-mir-7222	3	0.87354	0.87371	0.999904	20429	1	-3.6227	0.061861	0.061962	0.927685	1237	0	-3.6227
mmu-mir-6898	3	0.36251	0.51722	0.999197	13032	1	-3.7396	0.061861	0.061962	0.927685	1238	0	-3.7396
Rpl3	3	0.74121	0.77216	0.999904	18878	1	-3.2418	0.061861	0.061962	0.927685	1239	0	-3.2418
mmu-mir-6420	3	0.99402	0.99414	0.999904	22330	0	-1.5837	0.061861	0.061962	0.927685	1240	0	-1.5837
Tbc1d1	3	0.84469	0.84686	0.999904	20123	1	-3.5991	0.061861	0.061962	0.927685	1241	0	-3.5991
NonTargetingControlGuideForMouse_0940	1	0.93754	0.93774	0.999904	21225	0	-1.1431	0.062464	0.062421	0.927685	1242	0	-1.1431
Gpc2	5	0.60989	0.78055	0.999904	17187	1	-4.1137	0.063267	0.063204	0.927685	1243	0	-4.1137
Arhgef38	5	0.86393	0.91547	0.999904	20321	1	-2.1213	0.063267	0.063204	0.927685	1244	0	-2.1213
Arhgap40	5	0.65037	0.8028	0.999904	17773	1	-3.6227	0.063267	0.063204	0.927685	1245	0	-3.6227
Pvrl2	5	0.78425	0.88298	0.999904	19393	2	-3.3202	0.063267	0.063204	0.927685	1246	0	-3.3202
Aqp1	5	0.025996	0.093886	0.920454	1970	4	-5.3703	0.063267	0.063204	0.927685	1247	0	-5.3703
Sdsl	5	0.25592	0.48435	0.999197	10590	3	-4.7868	0.063267	0.063204	0.927685	1248	0	-4.7868
Gm13247	5	0.46121	0.68773	0.999904	14902	1	-3.5996	0.063267	0.063204	0.927685	1249	0	-3.5996
Nr2c2ap	5	0.41494	0.64425	0.999904	14055	3	-4.7475	0.063267	0.063204	0.927685	1250	0	-4.7475
Olfr161	5	0.096895	0.24977	0.975625	5463	4	-4.9595	0.063267	0.063204	0.927685	1251	0	-4.9595
Kcnh7	5	0.1351	0.32118	0.985049	6970	3	-5.3931	0.063267	0.063204	0.927685	1252	0	-5.3931
Klc3	5	0.65864	0.80747	0.999904	17906	2	-3.5572	0.063267	0.063204	0.927685	1253	0	-3.5572
Adh6a	5	0.52781	0.73751	0.999904	15978	2	-4.2348	0.063267	0.063204	0.927685	1254	0	-4.2348
Zfp963	5	0.77308	0.87578	0.999904	19257	2	-4.2779	0.063267	0.063204	0.927685	1255	0	-4.2779
Pitpnm3	5	0.48262	0.70753	0.999904	15290	2	-3.3851	0.063267	0.063204	0.927685	1256	0	-3.3851
Bhlhb9	5	0.1084	0.27198	0.980763	5968	2	-4.3108	0.063267	0.063204	0.927685	1257	0	-4.3108
Bgn	5	0.13793	0.32631	0.985049	7066	3	-5.3846	0.063267	0.063204	0.927685	1258	0	-5.3846
Hells	5	0.97412	0.97418	0.999904	21874	0	-1.4544	0.063267	0.063204	0.927685	1259	0	-1.4544
Ap4m1	5	0.78524	0.8836	0.999904	19407	2	-3.6612	0.063267	0.063204	0.927685	1260	0	-3.6612
Mapre3	5	0.28899	0.51897	0.999197	11438	3	-4.663	0.063267	0.063204	0.927685	1261	0	-4.663
Thumpd1	5	0.030875	0.10916	0.930147	2286	2	-4.2019	0.063267	0.063204	0.927685	1262	0	-4.2019
Syne1	5	0.57738	0.76313	0.999904	16697	2	-3.774	0.063267	0.063204	0.927685	1263	0	-3.774
Tex11	5	0.70024	0.83136	0.999904	18392	1	-3.8995	0.063267	0.063204	0.927685	1264	0	-3.8995
Commd1	5	0.032082	0.11223	0.930147	2361	3	-5.2335	0.063267	0.063204	0.927685	1265	0	-5.2335
Aldh1a2	5	0.83901	0.90826	0.999904	20057	1	-2.4083	0.063267	0.063204	0.927685	1266	0	-2.4083
Ttc27	5	0.97488	0.97495	0.999904	21890	0	-1.3475	0.063267	0.063204	0.927685	1267	0	-1.3475
Bmp1	5	0.82782	0.90536	0.999904	19929	1	-2.7803	0.063267	0.063204	0.927685	1268	0	-2.7803
Prkcz	5	0.034796	0.11852	0.931052	2501	4	-5.3193	0.063267	0.063204	0.927685	1269	0	-5.3193
Pkm	5	0.56418	0.7563	0.999904	16520	2	-4.1306	0.063267	0.063204	0.927685	1270	0	-4.1306
Pgrmc2	5	0.45184	0.67899	0.999904	14717	2	-4.0627	0.063267	0.063204	0.927685	1271	0	-4.0627
Ndst2	5	0.17987	0.3986	0.994281	8477	2	-3.0729	0.063267	0.063204	0.927685	1272	0	-3.0729
Pcnxl2	5	0.69989	0.83116	0.999904	18385	2	-3.9561	0.063267	0.063204	0.927685	1273	0	-3.9561
Wdr31	5	0.11679	0.28774	0.980763	6289	2	-3.4133	0.063267	0.063204	0.927685	1274	0	-3.4133
Slc45a2	5	0.3322	0.56308	0.999904	12438	3	-4.9142	0.063267	0.063204	0.927685	1275	0	-4.9142
Dync1i2	5	0.785	0.88344	0.999904	19401	1	-2.3204	0.063267	0.063204	0.927685	1276	0	-2.3204
Ccdc148	5	0.36278	0.59349	0.999904	13037	2	-4.5388	0.063267	0.063204	0.927685	1277	0	-4.5388
Vmn1r183	5	0.9536	0.95602	0.999904	21490	1	-3.0821	0.063267	0.063204	0.927685	1278	0	-3.0821
Nop14	5	0.14469	0.33837	0.987001	7318	1	-2.1986	0.063267	0.063204	0.927685	1279	0	-2.1986
Furin	5	0.46432	0.69064	0.999904	14964	2	-3.9846	0.063267	0.063204	0.927685	1280	0	-3.9846
Lrrc46	5	0.28243	0.51223	0.999197	11258	1	-3.1267	0.063267	0.063204	0.927685	1281	0	-3.1267
Abcg5	5	0.39808	0.62809	0.999904	13718	2	-4.3965	0.063267	0.063204	0.927685	1282	0	-4.3965
Rmnd5a	5	0.29247	0.52258	0.999197	11531	1	-4.1218	0.063267	0.063204	0.927685	1283	0	-4.1218
Gm12250	5	0.39052	0.62072	0.999904	13563	2	-4.3665	0.063267	0.063204	0.927685	1284	0	-4.3665
Ccdc85b	5	0.70218	0.83249	0.999904	18416	2	-3.8	0.063267	0.063204	0.927685	1285	0	-3.8
Zfp207	5	0.48635	0.71096	0.999904	15359	2	-4.0149	0.063267	0.063204	0.927685	1286	0	-4.0149
Srp19	5	0.48323	0.70808	0.999904	15297	2	-4.2461	0.063267	0.063204	0.927685	1287	0	-4.2461
Ier2	5	0.24746	0.47558	0.998754	10358	2	-4.4248	0.063267	0.063204	0.927685	1288	0	-4.4248
Capn11	5	0.6263	0.78951	0.999904	17422	1	-2.6593	0.063267	0.063204	0.927685	1289	0	-2.6593
Ints3	5	0.3638	0.59451	0.999904	13063	3	-4.8503	0.063267	0.063204	0.927685	1290	0	-4.8503
Spn	5	0.023498	0.08592	0.919324	1794	4	-5.5545	0.063267	0.063204	0.927685	1291	0	-5.5545
Smg1	5	0.18516	0.40735	0.994281	8651	3	-5.0635	0.063267	0.063204	0.927685	1292	0	-5.0635
4933426M11Rik	5	0.9687	0.96883	0.999904	21750	1	-4.1038	0.063267	0.063204	0.927685	1293	0	-4.1038
Pyurf	5	0.93656	0.9452	0.999904	21210	1	-4.1885	0.063267	0.063204	0.927685	1294	0	-4.1885
1700052N19Rik	5	0.10477	0.26499	0.980763	5806	2	-2.5992	0.063267	0.063204	0.927685	1295	0	-2.5992
Snrpd2	5	0.99832	0.99835	0.999942	22421	0	-3.2237	0.063267	0.063204	0.927685	1296	0	-3.2237
4930432M17Rik	5	0.21635	0.44236	0.996788	9511	2	-3.9723	0.063267	0.063204	0.927685	1297	0	-3.9723
Cux1	5	0.019186	0.071667	0.906307	1528	3	-5.2271	0.063267	0.063204	0.927685	1298	0	-5.2271
Defb46	5	0.038141	0.12616	0.931052	2696	3	-5.7168	0.063267	0.063204	0.927685	1299	0	-5.7168
Fkbp4	5	0.37132	0.6019	0.999904	13228	2	-3.6713	0.063267	0.063204	0.927685	1300	0	-3.6713
Olfr472	5	0.065083	0.18507	0.955716	4081	2	-3.9317	0.063267	0.063204	0.927685	1301	0	-3.9317
Lipe	5	0.053309	0.15986	0.95069	3485	1	-1.2901	0.063267	0.063204	0.927685	1302	0	-1.2901
Zfp579	5	0.029973	0.10633	0.929763	2221	4	-5.7969	0.063267	0.063204	0.927685	1303	0	-5.7969
Tubb2a	5	0.2756	0.50511	0.999197	11099	3	-5.0366	0.063267	0.063204	0.927685	1304	0	-5.0366
Gnl3l	5	0.6943	0.82789	0.999904	18322	1	-1.6611	0.063267	0.063204	0.927685	1305	0	-1.6611
Lrp8	5	0.48093	0.706	0.999904	15260	2	-3.5832	0.063267	0.063204	0.927685	1306	0	-3.5832
Gm5071	5	0.10409	0.26367	0.980763	5780	3	-5.4976	0.063267	0.063204	0.927685	1307	0	-5.4976
Ociad1	5	0.34975	0.58052	0.999904	12788	2	-4.4726	0.063267	0.063204	0.927685	1308	0	-4.4726
Shprh	5	0.31567	0.54643	0.999904	12071	3	-4.9505	0.063267	0.063204	0.927685	1309	0	-4.9505
Kifc1	5	0.049003	0.15039	0.947718	3269	3	-5.5391	0.063267	0.063204	0.927685	1310	0	-5.5391
Dhx33	5	0.99493	0.99492	0.999904	22352	0	-2.7657	0.063267	0.063204	0.927685	1311	0	-2.7657
Hhatl	5	0.6798	0.81947	0.999904	18152	2	-4.3154	0.063267	0.063204	0.927685	1312	0	-4.3154
Arl14ep	5	0.099636	0.2551	0.9797	5583	2	-3.8975	0.063267	0.063204	0.927685	1313	0	-3.8975
Tshz2	5	0.21252	0.43834	0.996612	9394	3	-4.6362	0.063267	0.063204	0.927685	1314	0	-4.6362
Olfr358	5	0.61631	0.78406	0.999904	17281	1	-3.2782	0.063267	0.063204	0.927685	1315	0	-3.2782
Tmub1	5	0.10116	0.25807	0.980532	5644	4	-5.4576	0.063267	0.063204	0.927685	1316	0	-5.4576
Exoc3	5	0.79626	0.89079	0.999904	19542	2	-3.8255	0.063267	0.063204	0.927685	1317	0	-3.8255
Champ1	5	0.71077	0.83755	0.999904	18509	2	-3.9271	0.063267	0.063204	0.927685	1318	0	-3.9271
Ier5l	5	0.99348	0.99346	0.999904	22313	0	-3.2713	0.063267	0.063204	0.927685	1319	0	-3.2713
Olfr677	5	0.87541	0.91913	0.999904	20450	1	-4.101	0.063267	0.063204	0.927685	1320	0	-4.101
Lfng	5	0.97322	0.97328	0.999904	21849	0	-3.8364	0.063267	0.063204	0.927685	1321	0	-3.8364
Vps9d1	5	0.99991	0.99991	0.999959	22467	0	-1.6611	0.063267	0.063204	0.927685	1322	0	-1.6611
Vmac	5	0.96979	0.96986	0.999904	21773	0	-2.7354	0.063267	0.063204	0.927685	1323	0	-2.7354
Commd10	5	0.15047	0.34856	0.989893	7496	2	-4.1107	0.063267	0.063204	0.927685	1324	0	-4.1107
Psen2	5	0.64	0.79703	0.999904	17634	2	-4.2213	0.063267	0.063204	0.927685	1325	0	-4.2213
Saa1	5	0.95783	0.95925	0.999904	21563	1	-3.5241	0.063267	0.063204	0.927685	1326	0	-3.5241
Dda1	5	0.66907	0.81335	0.999904	18040	2	-4.5195	0.063267	0.063204	0.927685	1327	0	-4.5195
1700029F12Rik	5	0.35099	0.58178	0.999904	12816	1	-2.7617	0.063267	0.063204	0.927685	1328	0	-2.7617
Psmc3ip	5	0.24444	0.47235	0.998472	10282	2	-4.2461	0.063267	0.063204	0.927685	1329	0	-4.2461
Psme2	5	0.0055284	0.022805	0.859951	489	4	-6.2841	0.063267	0.063204	0.927685	1330	0	-6.2841
Rnf146	5	0.77308	0.87578	0.999904	19256	2	-3.5473	0.063267	0.063204	0.927685	1331	0	-3.5473
Abcc5	5	0.4515	0.67868	0.999904	14714	1	-4.218	0.063267	0.063204	0.927685	1332	0	-4.218
Ano1	5	0.14603	0.3407	0.988714	7360	3	-4.68	0.063267	0.063204	0.927685	1333	0	-4.68
Mcoln3	5	0.10577	0.26692	0.980763	5854	3	-5.0366	0.063267	0.063204	0.927685	1334	0	-5.0366
Olfr482	5	0.099868	0.25554	0.9797	5595	3	-5.5112	0.063267	0.063204	0.927685	1335	0	-5.5112
Cd9	5	0.29947	0.52982	0.999826	11692	2	-4.2461	0.063267	0.063204	0.927685	1336	0	-4.2461
Zkscan8	5	0.32979	0.56062	0.999904	12377	3	-4.6316	0.063267	0.063204	0.927685	1337	0	-4.6316
Olfr1130	5	0.68398	0.82187	0.999904	18200	1	-3.3851	0.063267	0.063204	0.927685	1338	0	-3.3851
Mboat4	5	0.090274	0.23677	0.971523	5191	1	-3.7833	0.063267	0.063204	0.927685	1339	0	-3.7833
Bloc1s3	5	0.70312	0.83304	0.999904	18425	2	-2.7354	0.063267	0.063204	0.927685	1340	0	-2.7354
Nrsn2	5	0.97109	0.97115	0.999904	21793	0	-3.5404	0.063267	0.063204	0.927685	1341	0	-3.5404
Zan	5	0.65817	0.8072	0.999904	17899	2	-3.3161	0.063267	0.063204	0.927685	1342	0	-3.3161
Slc6a1	5	0.19206	0.41611	0.994281	8850	3	-5.2334	0.063267	0.063204	0.927685	1343	0	-5.2334
Hsbp1l1	5	0.44937	0.6767	0.999904	14682	3	-4.68	0.063267	0.063204	0.927685	1344	0	-4.68
Hspa9	5	0.69521	0.82843	0.999904	18335	2	-3.162	0.063267	0.063204	0.927685	1345	0	-3.162
Spats2l	5	0.060572	0.17556	0.954222	3877	2	-3.9271	0.063267	0.063204	0.927685	1346	0	-3.9271
Vmn1r195	5	0.78674	0.88458	0.999904	19424	1	-1.868	0.063267	0.063204	0.927685	1347	0	-1.868
March4	5	0.43992	0.66783	0.999904	14504	2	-4.413	0.063267	0.063204	0.927685	1348	0	-4.413
Cacnb1	5	0.70139	0.83203	0.999904	18408	1	-3.9051	0.063267	0.063204	0.927685	1349	0	-3.9051
5730507C01Rik	5	0.70609	0.83477	0.999904	18458	1	-3.3602	0.063267	0.063204	0.927685	1350	0	-3.3602
Csrp2bp	5	0.38867	0.61889	0.999904	13531	2	-4.2206	0.063267	0.063204	0.927685	1351	0	-4.2206
Usp43	5	0.41689	0.64614	0.999904	14093	3	-4.7469	0.063267	0.063204	0.927685	1352	0	-4.7469
Zfp939	5	0.38433	0.61467	0.999904	13458	3	-4.8098	0.063267	0.063204	0.927685	1353	0	-4.8098
Grm4	5	0.49107	0.71527	0.999904	15444	3	-4.5952	0.063267	0.063204	0.927685	1354	0	-4.5952
Zbtb33	5	0.67676	0.81773	0.999904	18111	2	-3.8242	0.063267	0.063204	0.927685	1355	0	-3.8242
Atp8a2	5	0.23074	0.45781	0.997696	9894	3	-5.1189	0.063267	0.063204	0.927685	1356	0	-5.1189
Vmn1r209	5	0.73043	0.84919	0.999904	18733	1	-3.019	0.063267	0.063204	0.927685	1357	0	-3.019
Gstm6	5	0.78027	0.88041	0.999904	19341	1	-4.1443	0.063267	0.063204	0.927685	1358	0	-4.1443
Zfp639	5	0.17676	0.39343	0.994281	8376	3	-5.0856	0.063267	0.063204	0.927685	1359	0	-5.0856
Ganab	5	0.98037	0.98046	0.999904	21991	0	-3.6651	0.063267	0.063204	0.927685	1360	0	-3.6651
4930529M08Rik	5	0.46831	0.69432	0.999904	15032	1	-4.028	0.063267	0.063204	0.927685	1361	0	-4.028
Rilpl1	5	0.37316	0.60374	0.999904	13265	1	-3.8995	0.063267	0.063204	0.927685	1362	0	-3.8995
Heatr6	5	0.83187	0.90642	0.999904	19969	1	-3.774	0.063267	0.063204	0.927685	1363	0	-3.774
Fcgr3	5	0.094901	0.24586	0.974641	5389	2	-4.3323	0.063267	0.063204	0.927685	1364	0	-4.3323
Pank1	5	0.26832	0.49752	0.999197	10912	3	-5.0501	0.063267	0.063204	0.927685	1365	0	-5.0501
Ndor1	5	0.23625	0.46371	0.997696	10045	3	-5.0501	0.063267	0.063204	0.927685	1366	0	-5.0501
Pars2	5	0.56352	0.75597	0.999904	16510	2	-3.8	0.063267	0.063204	0.927685	1367	0	-3.8
Olfr1243	5	0.35328	0.58403	0.999904	12854	2	-4.4396	0.063267	0.063204	0.927685	1368	0	-4.4396
Dcakd	5	0.87625	0.91939	0.999904	20464	1	-3.4445	0.063267	0.063204	0.927685	1369	0	-3.4445
Sfpq	5	0.99109	0.99114	0.999904	22248	0	-2.7555	0.063267	0.063204	0.927685	1370	0	-2.7555
Olfr1019	5	0.89954	0.92776	0.999904	20749	1	-3.4029	0.063267	0.063204	0.927685	1371	0	-3.4029
Olfr945	5	0.084033	0.22428	0.97076	4935	3	-5.2507	0.063267	0.063204	0.927685	1372	0	-5.2507
Olfr128	5	0.87747	0.9198	0.999904	20482	1	-3.5008	0.063267	0.063204	0.927685	1373	0	-3.5008
Ccnd3	5	0.019373	0.072281	0.906307	1538	4	-5.0997	0.063267	0.063204	0.927685	1374	0	-5.0997
Olfr818	5	0.97362	0.97367	0.999904	21859	0	-2.937	0.063267	0.063204	0.927685	1375	0	-2.937
Stambpl1	5	0.02582	0.093349	0.920454	1955	3	-5.9351	0.063267	0.063204	0.927685	1376	0	-5.9351
4921507P07Rik	5	0.14472	0.33842	0.987001	7320	3	-4.6811	0.063267	0.063204	0.927685	1377	0	-4.6811
Cab39	5	0.5243	0.73574	0.999904	15937	1	-3.9317	0.063267	0.063204	0.927685	1378	0	-3.9317
2300003K06Rik	5	0.096088	0.24816	0.975625	5439	3	-5.2271	0.063267	0.063204	0.927685	1379	0	-5.2271
Dusp7	5	0.77963	0.88002	0.999904	19334	2	-3.8975	0.063267	0.063204	0.927685	1380	0	-3.8975
Mcpt8	5	0.3942	0.62433	0.999904	13647	2	-2.0319	0.063267	0.063204	0.927685	1381	0	-2.0319
Upf3a	5	0.97203	0.97208	0.999904	21821	0	-2.7657	0.063267	0.063204	0.927685	1382	0	-2.7657
Cops3	5	0.89491	0.92602	0.999904	20690	1	-4.2418	0.063267	0.063204	0.927685	1383	0	-4.2418
Orai1	5	0.48152	0.70653	0.999904	15265	2	-2.9894	0.063267	0.063204	0.927685	1384	0	-2.9894
Smim8	5	0.27449	0.50394	0.999197	11072	3	-5.0367	0.063267	0.063204	0.927685	1385	0	-5.0367
Stard10	5	0.033439	0.11539	0.931052	2431	1	-2.993	0.063267	0.063204	0.927685	1386	0	-2.993
Got1	5	0.51291	0.72998	0.999904	15780	2	-3.8727	0.063267	0.063204	0.927685	1387	0	-3.8727
A3galt2	5	0.033324	0.11513	0.931052	2427	3	-5.8644	0.063267	0.063204	0.927685	1388	0	-5.8644
Actrt3	5	0.63504	0.79433	0.999904	17559	1	-2.3156	0.063267	0.063204	0.927685	1389	0	-2.3156
Marco	5	0.16823	0.3791	0.991903	8089	2	-3.6227	0.063267	0.063204	0.927685	1390	0	-3.6227
1500012F01Rik	5	0.73153	0.84987	0.999904	18748	1	-3.3851	0.063267	0.063204	0.927685	1391	0	-3.3851
Eif4ebp3	5	0.088541	0.23332	0.971523	5116	2	-3.774	0.063267	0.063204	0.927685	1392	0	-3.774
Zcchc5	5	0.3293	0.56013	0.999904	12366	3	-4.8065	0.063267	0.063204	0.927685	1393	0	-4.8065
2610034B18Rik	5	0.21976	0.44603	0.997696	9610	2	-1.3475	0.063267	0.063204	0.927685	1394	0	-1.3475
Olfr192	5	0.34013	0.57108	0.999904	12612	3	-4.8992	0.063267	0.063204	0.927685	1395	0	-4.8992
Sash3	5	0.37506	0.60561	0.999904	13295	2	-4.5316	0.063267	0.063204	0.927685	1396	0	-4.5316
Lrp2	5	0.97677	0.97684	0.999904	21927	0	-4.0586	0.063267	0.063204	0.927685	1397	0	-4.0586
Senp5	5	0.45106	0.67827	0.999904	14709	1	-2.9	0.063267	0.063204	0.927685	1398	0	-2.9
Gm12794	5	0.26735	0.49652	0.999197	10896	2	-4.2959	0.063267	0.063204	0.927685	1399	0	-4.2959
Smtnl1	5	0.7669	0.87184	0.999904	19177	2	-2.4719	0.063267	0.063204	0.927685	1400	0	-2.4719
Map2k1	5	0.58026	0.76463	0.999904	16740	2	-3.9186	0.063267	0.063204	0.927685	1401	0	-3.9186
4933408B17Rik	5	0.82071	0.90361	0.999904	19855	1	-3.8673	0.063267	0.063204	0.927685	1402	0	-3.8673
Kcnmb3	5	0.69909	0.83067	0.999904	18373	1	-3.5996	0.063267	0.063204	0.927685	1403	0	-3.5996
Il18rap	5	0.44816	0.67552	0.999904	14665	2	-3.6651	0.063267	0.063204	0.927685	1404	0	-3.6651
Zfp866	5	0.2237	0.4503	0.997696	9707	1	-4.1681	0.063267	0.063204	0.927685	1405	0	-4.1681
Mylk2	5	0.21635	0.44236	0.996788	9512	3	-5.0257	0.063267	0.063204	0.927685	1406	0	-5.0257
Clec10a	5	0.77798	0.87893	0.999904	19311	2	-3.7059	0.063267	0.063204	0.927685	1407	0	-3.7059
Slco1a1	5	0.48793	0.71241	0.999904	15390	2	-1.5128	0.063267	0.063204	0.927685	1408	0	-1.5128
Tusc2	5	0.87692	0.91961	0.999904	20472	1	-3.2656	0.063267	0.063204	0.927685	1409	0	-3.2656
Spag5	5	0.23871	0.46627	0.997696	10118	3	-5.1181	0.063267	0.063204	0.927685	1410	0	-5.1181
Gmnc	5	0.074762	0.20529	0.964708	4518	3	-5.6201	0.063267	0.063204	0.927685	1411	0	-5.6201
Cypt15	5	0.44317	0.67087	0.999904	14578	1	-2.4942	0.063267	0.063204	0.927685	1412	0	-2.4942
Serpini2	5	0.11256	0.27985	0.980763	6124	4	-5.2152	0.063267	0.063204	0.927685	1413	0	-5.2152
Dnmt3a	5	0.01626	0.061712	0.899111	1340	3	-6.0498	0.063267	0.063204	0.927685	1414	0	-6.0498
Ndufb2	5	0.92513	0.93913	0.999904	21043	1	-3.2713	0.063267	0.063204	0.927685	1415	0	-3.2713
Neurl2	5	0.96598	0.96622	0.999904	21705	1	-4.3665	0.063267	0.063204	0.927685	1416	0	-4.3665
Ust	5	0.5685	0.75853	0.999904	16575	2	-1.8017	0.063267	0.063204	0.927685	1417	0	-1.8017
Doxl2	5	0.87154	0.91788	0.999904	20403	1	-4.2206	0.063267	0.063204	0.927685	1418	0	-4.2206
Slc14a2	5	0.39336	0.62353	0.999904	13629	3	-4.7882	0.063267	0.063204	0.927685	1419	0	-4.7882
Slc36a3	5	0.13132	0.31432	0.984117	6831	3	-4.9368	0.063267	0.063204	0.927685	1420	0	-4.9368
Cldn26	5	0.26943	0.49867	0.999197	10947	2	-3.9561	0.063267	0.063204	0.927685	1421	0	-3.9561
Cfhr1	5	0.22498	0.45167	0.997696	9748	1	-3.0322	0.063267	0.063204	0.927685	1422	0	-3.0322
Prtg	5	0.99819	0.99822	0.999942	22419	0	-1.8731	0.063267	0.063204	0.927685	1423	0	-1.8731
Mpzl3	5	0.47286	0.6985	0.999904	15117	2	-3.8373	0.063267	0.063204	0.927685	1424	0	-3.8373
Trappc3	5	0.98131	0.98143	0.999904	22015	0	-3.4029	0.063267	0.063204	0.927685	1425	0	-3.4029
Rnf165	5	0.030099	0.10674	0.929763	2231	2	-4.0398	0.063267	0.063204	0.927685	1426	0	-4.0398
Lamtor5	5	0.30227	0.53269	0.999904	11753	3	-4.981	0.063267	0.063204	0.927685	1427	0	-4.981
Prss52	5	0.9926	0.99261	0.999904	22287	0	-3.2003	0.063267	0.063204	0.927685	1428	0	-3.2003
Stip1	5	0.98413	0.98421	0.999904	22085	0	-3.3695	0.063267	0.063204	0.927685	1429	0	-3.3695
Spg7	5	0.87067	0.9176	0.999904	20399	1	-3.9982	0.063267	0.063204	0.927685	1430	0	-3.9982
Acadsb	5	0.72571	0.84636	0.999904	18680	2	-4.0369	0.063267	0.063204	0.927685	1431	0	-4.0369
Crispld1	5	0.14271	0.33487	0.987001	7237	3	-5.3674	0.063267	0.063204	0.927685	1432	0	-5.3674
Sel1l3	5	0.54447	0.74604	0.999904	16230	1	-3.1682	0.063267	0.063204	0.927685	1433	0	-3.1682
Fam65b	5	0.03498	0.11894	0.931052	2512	3	-4.7066	0.063267	0.063204	0.927685	1434	0	-4.7066
Zfhx3	5	0.12946	0.31097	0.984117	6752	2	-1.2901	0.063267	0.063204	0.927685	1435	0	-1.2901
Trp53rk	5	0.44607	0.67357	0.999904	14624	1	-2.3859	0.063267	0.063204	0.927685	1436	0	-2.3859
Fnbp4	5	0.024134	0.087954	0.920454	1835	2	-4.1823	0.063267	0.063204	0.927685	1437	0	-4.1823
Pan3	5	0.37544	0.60597	0.999904	13310	1	-3.4848	0.063267	0.063204	0.927685	1438	0	-3.4848
4921539E11Rik	5	0.76952	0.87352	0.999904	19206	1	-2.9473	0.063267	0.063204	0.927685	1439	0	-2.9473
Rars2	5	0.96247	0.96312	0.999904	21645	1	-3.9855	0.063267	0.063204	0.927685	1440	0	-3.9855
Dll1	5	0.15571	0.35771	0.991654	7665	3	-4.7859	0.063267	0.063204	0.927685	1441	0	-4.7859
BC005624	5	0.10968	0.27437	0.980763	6028	4	-5.2031	0.063267	0.063204	0.927685	1442	0	-5.2031
Prss45	5	0.43164	0.6601	0.999904	14371	3	-4.717	0.063267	0.063204	0.927685	1443	0	-4.717
Fgfr1op2	5	0.9967	0.99669	0.999942	22387	0	-2.3417	0.063267	0.063204	0.927685	1444	0	-2.3417
C1galt1c1	5	0.68328	0.82147	0.999904	18192	1	-3.1138	0.063267	0.063204	0.927685	1445	0	-3.1138
Elovl4	5	0.16377	0.37156	0.991654	7936	3	-5.308	0.063267	0.063204	0.927685	1446	0	-5.308
Lin28a	5	0.87576	0.91924	0.999904	20458	1	-3.4191	0.063267	0.063204	0.927685	1447	0	-3.4191
Vps29	5	0.9493	0.95301	0.999904	21418	1	-2.8648	0.063267	0.063204	0.927685	1448	0	-2.8648
Fam209	5	0.26739	0.49656	0.999197	10898	2	-4.5425	0.063267	0.063204	0.927685	1449	0	-4.5425
Myo9a	5	0.73911	0.85452	0.999904	18845	2	-4.4793	0.063267	0.063204	0.927685	1450	0	-4.4793
Olfml1	5	0.35956	0.59028	0.999904	12973	3	-4.8598	0.063267	0.063204	0.927685	1451	0	-4.8598
Phkg2	5	0.040224	0.13088	0.932348	2822	3	-4.663	0.063267	0.063204	0.927685	1452	0	-4.663
Tnfrsf17	5	0.655	0.80541	0.999904	17857	2	-4.5388	0.063267	0.063204	0.927685	1453	0	-4.5388
Idi1	5	0.98555	0.98558	0.999904	22107	0	-2.8511	0.063267	0.063204	0.927685	1454	0	-2.8511
Bcas3	5	0.16503	0.37367	0.991654	7979	3	-4.68	0.063267	0.063204	0.927685	1455	0	-4.68
Rassf10	5	0.25033	0.47859	0.999197	10427	2	-4.4999	0.063267	0.063204	0.927685	1456	0	-4.4999
Ube2k	5	0.19616	0.42057	0.994993	8959	3	-4.7472	0.063267	0.063204	0.927685	1457	0	-4.7472
Tex26	5	0.88955	0.92401	0.999904	20639	1	-3.7726	0.063267	0.063204	0.927685	1458	0	-3.7726
Slc12a6	5	0.31487	0.54559	0.999904	12050	2	-3.8484	0.063267	0.063204	0.927685	1459	0	-3.8484
Ftl1	5	0.0092426	0.036831	0.868407	808	4	-6.1773	0.063267	0.063204	0.927685	1460	0	-6.1773
Tcerg1l	5	0.01358	0.052301	0.895031	1146	4	-5.9922	0.063267	0.063204	0.927685	1461	0	-5.9922
Dennd2d	5	0.36808	0.5987	0.999904	13157	3	-4.8433	0.063267	0.063204	0.927685	1462	0	-4.8433
Gm11563	5	0.23425	0.46157	0.997696	9989	3	-4.5923	0.063267	0.063204	0.927685	1463	0	-4.5923
Capn7	5	0.96598	0.96622	0.999904	21706	1	-2.7139	0.063267	0.063204	0.927685	1464	0	-2.7139
Arl2	5	0.4425	0.67024	0.999904	14565	2	-4.5692	0.063267	0.063204	0.927685	1465	0	-4.5692
Zfp395	5	0.53024	0.73875	0.999904	16012	1	-1.2213	0.063267	0.063204	0.927685	1466	0	-1.2213
Duoxa1	5	0.70993	0.83708	0.999904	18498	2	-4.0204	0.063267	0.063204	0.927685	1467	0	-4.0204
Mgp	5	0.29471	0.52488	0.999197	11579	1	-4.3905	0.063267	0.063204	0.927685	1468	0	-4.3905
Polr2c	5	0.86304	0.9152	0.999904	20310	1	-4.1693	0.063267	0.063204	0.927685	1469	0	-4.1693
Fcrl6	5	0.36067	0.59141	0.999904	12996	2	-4.2074	0.063267	0.063204	0.927685	1470	0	-4.2074
Snai1	5	0.21255	0.43837	0.996612	9395	2	-2.8511	0.063267	0.063204	0.927685	1471	0	-2.8511
Ctnna2	5	0.31141	0.54204	0.999904	11966	2	-4.2962	0.063267	0.063204	0.927685	1472	0	-4.2962
Tex36	5	0.77228	0.87526	0.999904	19241	2	-4.0149	0.063267	0.063204	0.927685	1473	0	-4.0149
Usp26	5	0.76058	0.86785	0.999904	19098	1	-3.9051	0.063267	0.063204	0.927685	1474	0	-3.9051
Scamp2	5	0.97517	0.97524	0.999904	21898	0	-3.2207	0.063267	0.063204	0.927685	1475	0	-3.2207
Xrcc6bp1	5	0.11389	0.28234	0.980763	6174	3	-4.5831	0.063267	0.063204	0.927685	1476	0	-4.5831
Apol9a	5	0.92665	0.93988	0.999904	21072	1	-4.101	0.063267	0.063204	0.927685	1477	0	-4.101
4930590J08Rik	5	0.36558	0.59626	0.999904	13098	2	-3.6612	0.063267	0.063204	0.927685	1478	0	-3.6612
Dnajc22	5	0.95651	0.95824	0.999904	21534	1	-2.4719	0.063267	0.063204	0.927685	1479	0	-2.4719
Asna1	5	0.95888	0.96009	0.999904	21583	1	-3.7396	0.063267	0.063204	0.927685	1480	0	-3.7396
Tnpo3	5	0.14983	0.34746	0.98953	7476	2	-4.4793	0.063267	0.063204	0.927685	1481	0	-4.4793
Gpr26	5	0.36503	0.59572	0.999904	13084	3	-4.8483	0.063267	0.063204	0.927685	1482	0	-4.8483
Dctpp1	5	0.95308	0.95567	0.999904	21476	1	-3.2713	0.063267	0.063204	0.927685	1483	0	-3.2713
Insig2	5	0.059705	0.17367	0.954222	3824	4	-5.1673	0.063267	0.063204	0.927685	1484	0	-5.1673
Awat2	5	0.95551	0.95747	0.999904	21515	1	-3.6931	0.063267	0.063204	0.927685	1485	0	-3.6931
Sap130	5	0.95512	0.95716	0.999904	21509	1	-3.1682	0.063267	0.063204	0.927685	1486	0	-3.1682
Thoc3	5	0.99945	0.99945	0.999942	22454	0	-2.4135	0.063267	0.063204	0.927685	1487	0	-2.4135
Rab39	5	0.50154	0.72422	0.999904	15630	2	-3.4848	0.063267	0.063204	0.927685	1488	0	-3.4848
Mrpl40	5	0.80159	0.89433	0.999904	19613	2	-3.0729	0.063267	0.063204	0.927685	1489	0	-3.0729
C87499	5	0.4997	0.72319	0.999904	15603	3	-4.5773	0.063267	0.063204	0.927685	1490	0	-4.5773
Srr	5	0.026229	0.094634	0.920454	1988	4	-4.8701	0.063267	0.063204	0.927685	1491	0	-4.8701
Bche	5	0.21564	0.44158	0.996612	9486	2	-4.1137	0.063267	0.063204	0.927685	1492	0	-4.1137
Ttll6	5	0.050929	0.15468	0.95069	3365	3	-5.7441	0.063267	0.063204	0.927685	1493	0	-5.7441
Ccl22	5	0.35041	0.58118	0.999904	12799	2	-3.2783	0.063267	0.063204	0.927685	1494	0	-3.2783
4930564D02Rik	5	0.45688	0.68366	0.999904	14839	3	-4.6648	0.063267	0.063204	0.927685	1495	0	-4.6648
Ubald2	2	0.96597	0.96617	0.999904	21704	0	-1.7522	0.064824	0.06472	0.927685	1496	0	-1.7522
Gnat2	4	0.20898	0.39779	0.994281	9309	3	-4.9741	0.067004	0.066911	0.927685	1497	0	-4.9741
Zfp750	4	0.053068	0.15237	0.949111	3467	3	-5.2146	0.067004	0.066911	0.927685	1498	0	-5.2146
Vav3	4	0.33642	0.55092	0.999904	12527	2	-4.7052	0.067004	0.066911	0.927685	1499	0	-4.7052
Gm4788	4	0.72137	0.82428	0.999904	18637	1	-4.0139	0.067004	0.066911	0.927685	1500	0	-4.0139
Foxa2	4	0.91425	0.91688	0.999904	20901	1	-2.7496	0.067004	0.066911	0.927685	1501	0	-2.7496
Tinf2	4	0.98144	0.98146	0.999904	22019	0	-3.9627	0.067004	0.066911	0.927685	1502	0	-3.9627
mmu-mir-6913	4	0.10297	0.24121	0.974059	5731	3	-5.4732	0.067004	0.066911	0.927685	1503	0	-5.4732
Rpl36	4	0.86819	0.88625	0.999904	20370	1	-2.5522	0.067004	0.066911	0.927685	1504	0	-2.5522
Bora	4	0.30316	0.52215	0.999197	11767	1	-3.4125	0.067004	0.066911	0.927685	1505	0	-3.4125
Slc16a8	4	0.83094	0.86699	0.999904	19962	1	-1.8718	0.067004	0.066911	0.927685	1506	0	-1.8718
Awat1	4	0.33208	0.54779	0.999904	12434	1	-3.4066	0.067004	0.066911	0.927685	1507	0	-3.4066
Ints1	4	0.6234	0.76381	0.999904	17385	2	-4.5749	0.067004	0.066911	0.927685	1508	0	-4.5749
mmu-mir-5626	4	0.11527	0.26036	0.980532	6231	3	-5.3328	0.067004	0.066911	0.927685	1509	0	-5.3328
Pcp4l1	4	0.37153	0.57614	0.999904	13230	1	-3.5525	0.067004	0.066911	0.927685	1510	0	-3.5525
mmu-mir-7235	4	0.96628	0.96629	0.999904	21713	0	-2.2137	0.067004	0.066911	0.927685	1511	0	-2.2137
Rpl30	4	0.93954	0.93948	0.999904	21262	0	-3.9706	0.067004	0.066911	0.927685	1512	0	-3.9706
Pex5l	4	0.20959	0.39864	0.994281	9323	2	-4.3083	0.067004	0.066911	0.927685	1513	0	-4.3083
H1foo	4	0.4325	0.62012	0.999904	14379	2	-3.1367	0.067004	0.066911	0.927685	1514	0	-3.1367
Ccne1	4	0.36671	0.57267	0.999904	13123	2	-2.5997	0.067004	0.066911	0.927685	1515	0	-2.5997
Aurkb	4	0.97871	0.97883	0.999904	21965	0	-3.24	0.067004	0.066911	0.927685	1516	0	-3.24
Rin1	4	0.15142	0.31509	0.984117	7523	2	-4.7062	0.067004	0.066911	0.927685	1517	0	-4.7062
Zfp292	4	0.57938	0.7296	0.999904	16721	1	-2.7587	0.067004	0.066911	0.927685	1518	0	-2.7587
Sf3a1	4	0.99334	0.99337	0.999904	22307	0	-2.5429	0.067004	0.066911	0.927685	1519	0	-2.5429
Ubb	4	0.47867	0.65401	0.999904	15201	2	-4.5534	0.067004	0.066911	0.927685	1520	0	-4.5534
Yipf1	4	0.88182	0.89428	0.999904	20538	1	-3.9275	0.067004	0.066911	0.927685	1521	0	-3.9275
Ndufaf4	4	0.61151	0.75457	0.999904	17208	2	-4.6396	0.067004	0.066911	0.927685	1522	0	-4.6396
mmu-mir-6383	4	0.28805	0.50309	0.999197	11405	2	-4.6037	0.067004	0.066911	0.927685	1523	0	-4.6037
Zfp442	4	0.16556	0.33601	0.987001	7993	3	-5.1636	0.067004	0.066911	0.927685	1524	0	-5.1636
Rsrc2	4	0.9971	0.99712	0.999942	22394	0	-1.5553	0.067004	0.066911	0.927685	1525	0	-1.5553
Gpr123	4	0.99541	0.99541	0.999904	22366	0	-2.6033	0.067004	0.066911	0.927685	1526	0	-2.6033
Hrnr	4	0.98888	0.98894	0.999904	22192	0	-3.1742	0.067004	0.066911	0.927685	1527	0	-3.1742
mmu-mir-6342	4	0.86547	0.8847	0.999904	20339	1	-4.0997	0.067004	0.066911	0.927685	1528	0	-4.0997
Ets1	4	0.42228	0.61272	0.999904	14200	1	-4.4519	0.067004	0.066911	0.927685	1529	0	-4.4519
mmu-mir-6481	4	0.40362	0.59923	0.999904	13829	2	-4.6035	0.067004	0.066911	0.927685	1530	0	-4.6035
Tceal3	4	0.051615	0.14876	0.946062	3397	2	-3.3622	0.067004	0.066911	0.927685	1531	0	-3.3622
mmu-mir-26a-2	4	0.19449	0.37737	0.991903	8911	3	-4.9679	0.067004	0.066911	0.927685	1532	0	-4.9679
Zfp622	4	0.86079	0.88203	0.999904	20288	1	-3.695	0.067004	0.066911	0.927685	1533	0	-3.695
Rrp7a	4	0.81286	0.8587	0.999904	19771	1	-4.1463	0.067004	0.066911	0.927685	1534	0	-4.1463
mmu-mir-149	4	0.83353	0.86823	0.999904	19994	1	-3.6981	0.067004	0.066911	0.927685	1535	0	-3.6981
NonTargetingControlGuideForMouse_0314	1	0.93114	0.9313	0.999904	21135	0	-1.2929	0.068865	0.068828	0.927685	1536	0	-1.2929
NonTargetingControlGuideForMouse_0688	1	0.92885	0.92909	0.999904	21102	0	-1.3475	0.071148	0.071118	0.927685	1537	0	-1.3475
mmu-mir-718	1	0.92885	0.92909	0.999904	21103	0	-1.3475	0.071148	0.071118	0.927685	1538	0	-1.3475
1700009P17Rik	6	0.083017	0.2428	0.974059	4894	4	-5.2911	0.075432	0.075675	0.927685	1539	0	-5.2911
Zcchc3	6	0.51499	0.74286	0.999904	15807	3	-4.6814	0.075432	0.075675	0.927685	1540	0	-4.6814
Pdpn	6	0.021934	0.086033	0.919324	1695	4	-5.3178	0.075432	0.075675	0.927685	1541	0	-5.3178
Ndufs8	6	0.080531	0.237	0.971523	4776	5	-4.8279	0.075432	0.075675	0.927685	1542	0	-4.8279
Cuedc1	6	0.10899	0.30055	0.984117	5997	2	-3.3139	0.075432	0.075675	0.927685	1543	0	-3.3139
Adcy7	6	0.60273	0.80576	0.999904	17082	1	-3.8537	0.075432	0.075675	0.927685	1544	0	-3.8537
Slc26a4	6	0.095831	0.2718	0.980763	5425	3	-4.5267	0.075432	0.075675	0.927685	1545	0	-4.5267
Psph	6	0.42077	0.67392	0.999904	14160	2	-3.9915	0.075432	0.075675	0.927685	1546	0	-3.9915
Olfr862	6	0.95969	0.96833	0.999904	21603	1	-3.8017	0.075432	0.075675	0.927685	1547	0	-3.8017
Gm21708	6	0.95542	0.96647	0.999904	21514	1	-3.5468	0.075432	0.075675	0.927685	1548	0	-3.5468
0610009O20Rik	6	0.051267	0.16601	0.953043	3381	4	-5.3583	0.075432	0.075675	0.927685	1549	0	-5.3583
Rheb	6	0.6148	0.81433	0.999904	17252	3	-4.6117	0.075432	0.075675	0.927685	1550	0	-4.6117
Ssr4	6	0.15753	0.37434	0.991654	7732	3	-2.6795	0.075432	0.075675	0.927685	1551	0	-2.6795
Atp8a1	6	0.1478	0.35994	0.991654	7417	2	-4.3936	0.075432	0.075675	0.927685	1552	0	-4.3936
Faim	6	0.45719	0.70057	0.999904	14848	2	-2.8503	0.075432	0.075675	0.927685	1553	0	-2.8503
A530032D15Rik	6	0.6212	0.81884	0.999904	17355	3	-4.5169	0.075432	0.075675	0.927685	1554	0	-4.5169
Ntn1	6	0.77705	0.89177	0.999904	19300	2	-3.522	0.075432	0.075675	0.927685	1555	0	-3.522
Yae1d1	6	0.17472	0.39928	0.994281	8309	3	-4.8003	0.075432	0.075675	0.927685	1556	0	-4.8003
Nemf	6	0.95255	0.96535	0.999904	21468	1	-3.2648	0.075432	0.075675	0.927685	1557	0	-3.2648
Olfr424	6	0.078579	0.23247	0.971523	4691	4	-4.9106	0.075432	0.075675	0.927685	1558	0	-4.9106
Olfr808	6	0.054973	0.17544	0.954222	3567	4	-4.9499	0.075432	0.075675	0.927685	1559	0	-4.9499
Ppfibp1	6	0.97089	0.97419	0.999904	21786	1	-3.7994	0.075432	0.075675	0.927685	1560	0	-3.7994
Tm9sf4	6	0.8861	0.94587	0.999904	20591	2	-4.398	0.075432	0.075675	0.927685	1561	0	-4.398
Rsrc1	6	0.37411	0.63939	0.999904	13280	3	-4.1463	0.075432	0.075675	0.927685	1562	0	-4.1463
Tex13a	6	0.47992	0.71715	0.999904	15237	3	-4.3379	0.075432	0.075675	0.927685	1563	0	-4.3379
Mier2	6	0.23896	0.48702	0.999197	10125	3	-3.7171	0.075432	0.075675	0.927685	1564	0	-3.7171
Fam213a	6	0.52458	0.74976	0.999904	15939	2	-4.0839	0.075432	0.075675	0.927685	1565	0	-4.0839
Wdr76	6	0.44403	0.69099	0.999904	14592	3	-4.6672	0.075432	0.075675	0.927685	1566	0	-4.6672
Selenbp2	6	0.23573	0.4828	0.999197	10026	3	-4.1288	0.075432	0.075675	0.927685	1567	0	-4.1288
Qsox2	6	0.18889	0.41914	0.994618	8770	4	-5.0307	0.075432	0.075675	0.927685	1568	0	-5.0307
Dnajc2	6	0.50862	0.73818	0.999904	15723	3	-4.527	0.075432	0.075675	0.927685	1569	0	-4.527
Kctd20	6	0.26279	0.51792	0.999197	10791	3	-4.6728	0.075432	0.075675	0.927685	1570	0	-4.6728
Pabpn1l	6	0.72968	0.87168	0.999904	18720	2	-3.9502	0.075432	0.075675	0.927685	1571	0	-3.9502
Hist1h1a	6	0.88416	0.94478	0.999904	20570	1	-3.5539	0.075432	0.075675	0.927685	1572	0	-3.5539
Kctd7	6	0.75271	0.88121	0.999904	19003	2	-3.7343	0.075432	0.075675	0.927685	1573	0	-3.7343
Gm12253	6	0.19929	0.43369	0.996612	9036	2	-2.7566	0.075432	0.075675	0.927685	1574	0	-2.7566
Trim13	6	0.04366	0.14621	0.944552	3000	3	-4.2498	0.075432	0.075675	0.927685	1575	0	-4.2498
Opn4	6	0.30569	0.57151	0.999904	11827	2	-4.1141	0.075432	0.075675	0.927685	1576	0	-4.1141
Hip1r	6	0.77892	0.89258	0.999904	19324	2	-3.8991	0.075432	0.075675	0.927685	1577	0	-3.8991
Brcc3	6	0.18173	0.40914	0.994281	8538	2	-4.1868	0.075432	0.075675	0.927685	1578	0	-4.1868
Asb8	6	0.5115	0.74026	0.999904	15761	3	-4.6642	0.075432	0.075675	0.927685	1579	0	-4.6642
Pmp2	6	0.46718	0.70786	0.999904	15011	1	-2.7653	0.075432	0.075675	0.927685	1580	0	-2.7653
Bpifb3	6	0.10291	0.28734	0.980763	5726	2	-4.0403	0.075432	0.075675	0.927685	1581	0	-4.0403
Olfr186	6	0.85244	0.92756	0.999904	20212	2	-2.9425	0.075432	0.075675	0.927685	1582	0	-2.9425
Igf2bp2	6	0.0066472	0.030922	0.866029	586	2	-4.387	0.075432	0.075675	0.927685	1583	0	-4.387
Idnk	6	0.11771	0.31429	0.984117	6319	3	-4.0157	0.075432	0.075675	0.927685	1584	0	-4.0157
Megf6	6	0.84806	0.9253	0.999904	20158	1	-2.0781	0.075432	0.075675	0.927685	1585	0	-2.0781
Mtif3	6	0.49987	0.73173	0.999904	15608	1	-3.2038	0.075432	0.075675	0.927685	1586	0	-3.2038
Zwilch	6	0.0049029	0.023262	0.859951	447	4	-6.0275	0.075432	0.075675	0.927685	1587	0	-6.0275
Atf7ip	6	0.44633	0.69269	0.999904	14632	3	-3.9089	0.075432	0.075675	0.927685	1588	0	-3.9089
Qrfp	6	0.23483	0.4816	0.999197	10006	3	-4.8363	0.075432	0.075675	0.927685	1589	0	-4.8363
Dhodh	6	0.99809	0.99809	0.999942	22416	0	-2.089	0.075432	0.075675	0.927685	1590	0	-2.089
Rrp1	6	0.25875	0.51277	0.999197	10659	1	-3.5959	0.075432	0.075675	0.927685	1591	0	-3.5959
Pacsin1	6	0.69308	0.85729	0.999904	18302	2	-3.7363	0.075432	0.075675	0.927685	1592	0	-3.7363
Zpld1	6	0.71446	0.86564	0.999904	18552	2	-3.6713	0.075432	0.075675	0.927685	1593	0	-3.6713
Nat6	6	0.52951	0.75335	0.999904	16000	3	-4.4932	0.075432	0.075675	0.927685	1594	0	-4.4932
4921504E06Rik	6	0.49443	0.7277	0.999904	15498	3	-4.2797	0.075432	0.075675	0.927685	1595	0	-4.2797
Olfr1230	6	0.40911	0.66535	0.999904	13937	3	-4.5315	0.075432	0.075675	0.927685	1596	0	-4.5315
4933434E20Rik	6	0.73364	0.87328	0.999904	18773	2	-3.963	0.075432	0.075675	0.927685	1597	0	-3.963
Gatc	6	0.3427	0.61553	0.999904	12667	3	-4.4898	0.075432	0.075675	0.927685	1598	0	-4.4898
Espn	6	0.26569	0.52162	0.999197	10867	4	-4.9189	0.075432	0.075675	0.927685	1599	0	-4.9189
Adora1	6	0.010191	0.045758	0.87577	882	4	-5.4614	0.075432	0.075675	0.927685	1600	0	-5.4614
Vax1	6	0.13855	0.34617	0.98953	7091	3	-4.7674	0.075432	0.075675	0.927685	1601	0	-4.7674
Sept12	6	0.053042	0.17052	0.954222	3465	4	-5.5592	0.075432	0.075675	0.927685	1602	0	-5.5592
Ado	6	0.2879	0.54955	0.999904	11395	3	-4.4388	0.075432	0.075675	0.927685	1603	0	-4.4388
Tbc1d30	6	0.86927	0.93652	0.999904	20377	1	-3.1808	0.075432	0.075675	0.927685	1604	0	-3.1808
Med30	6	0.89041	0.9484	0.999904	20646	1	-3.6443	0.075432	0.075675	0.927685	1605	0	-3.6443
Gm1673	6	0.20745	0.44485	0.997696	9255	3	-4.7456	0.075432	0.075675	0.927685	1606	0	-4.7456
Cnot11	6	0.10619	0.29459	0.983087	5869	3	-4.2027	0.075432	0.075675	0.927685	1607	0	-4.2027
Gpr55	6	0.82805	0.9153	0.999904	19931	2	-3.8144	0.075432	0.075675	0.927685	1608	0	-3.8144
Ccdc14	6	0.26164	0.51648	0.999197	10750	4	-4.8261	0.075432	0.075675	0.927685	1609	0	-4.8261
Gsdmc4	6	0.22198	0.46449	0.997696	9663	3	-4.4399	0.075432	0.075675	0.927685	1610	0	-4.4399
Tmem57	6	0.52174	0.7477	0.999904	15898	1	-2.2387	0.075432	0.075675	0.927685	1611	0	-2.2387
Dgat2l6	6	0.025424	0.096148	0.920454	1925	4	-5.6688	0.075432	0.075675	0.927685	1612	0	-5.6688
Gpr152	6	0.83695	0.91969	0.999904	20024	2	-4.1057	0.075432	0.075675	0.927685	1613	0	-4.1057
Tfe3	6	0.26164	0.51648	0.999197	10751	2	-3.6471	0.075432	0.075675	0.927685	1614	0	-3.6471
Cst13	6	0.020721	0.082447	0.919324	1616	3	-3.2869	0.075432	0.075675	0.927685	1615	0	-3.2869
Dcxr	6	0.99123	0.99123	0.999904	22253	0	-3.4244	0.075432	0.075675	0.927685	1616	0	-3.4244
Gstp1	6	0.60425	0.80686	0.999904	17103	3	-4.2565	0.075432	0.075675	0.927685	1617	0	-4.2565
Krtap22-2	6	0.41906	0.67268	0.999904	14128	2	-3.3861	0.075432	0.075675	0.927685	1618	0	-3.3861
Hoxb2	6	0.071513	0.21586	0.966362	4391	2	-4.0252	0.075432	0.075675	0.927685	1619	0	-4.0252
Tapbp	6	0.049063	0.16028	0.950767	3273	4	-5.4614	0.075432	0.075675	0.927685	1620	0	-5.4614
Dagla	6	0.16584	0.38655	0.992263	7999	4	-5.0937	0.075432	0.075675	0.927685	1621	0	-5.0937
Xkr8	6	0.57197	0.78369	0.999904	16623	3	-4.2548	0.075432	0.075675	0.927685	1622	0	-4.2548
Unc5cl	6	0.5052	0.73565	0.999904	15672	2	-3.8288	0.075432	0.075675	0.927685	1623	0	-3.8288
Pstk	6	0.48901	0.72378	0.999904	15407	3	-4.6283	0.075432	0.075675	0.927685	1624	0	-4.6283
Elmo3	6	0.985	0.9851	0.999904	22096	0	-3.2378	0.075432	0.075675	0.927685	1625	0	-3.2378
Wnt2	6	0.22198	0.46449	0.997696	9666	3	-4.7037	0.075432	0.075675	0.927685	1626	0	-4.7037
Olfr320	6	0.21527	0.45554	0.997696	9473	3	-4.5133	0.075432	0.075675	0.927685	1627	0	-4.5133
Isx	6	0.91949	0.95499	0.999904	20960	1	-3.7249	0.075432	0.075675	0.927685	1628	0	-3.7249
Gpr143	6	0.42084	0.67397	0.999904	14161	3	-4.5621	0.075432	0.075675	0.927685	1629	0	-4.5621
Aadat	6	0.33632	0.60814	0.999904	12522	4	-4.6144	0.075432	0.075675	0.927685	1630	0	-4.6144
Ccin	6	0.22394	0.46717	0.997935	9719	2	-3.3924	0.075432	0.075675	0.927685	1631	0	-3.3924
Mageb4	6	0.50611	0.73633	0.999904	15686	2	-2.7679	0.075432	0.075675	0.927685	1632	0	-2.7679
Sval3	6	0.24944	0.50058	0.999197	10409	3	-4.9209	0.075432	0.075675	0.927685	1633	0	-4.9209
Hectd1	6	0.37305	0.63859	0.999904	13256	3	-4.5199	0.075432	0.075675	0.927685	1634	0	-4.5199
Olfr816	6	0.2111	0.44982	0.997696	9363	3	-4.7859	0.075432	0.075675	0.927685	1635	0	-4.7859
Serpina11	6	0.90048	0.95054	0.999904	20753	1	-3.1574	0.075432	0.075675	0.927685	1636	0	-3.1574
Scn10a	6	0.55671	0.77279	0.999904	16411	3	-4.5063	0.075432	0.075675	0.927685	1637	0	-4.5063
Hspa12b	6	0.0077012	0.035435	0.868407	678	4	-5.9733	0.075432	0.075675	0.927685	1638	0	-5.9733
Prg2	6	0.28846	0.55024	0.999904	11414	3	-4.2106	0.075432	0.075675	0.927685	1639	0	-4.2106
Mad2l1bp	6	0.077051	0.22891	0.971523	4620	2	-3.5356	0.075432	0.075675	0.927685	1640	0	-3.5356
Mtif2	6	0.26896	0.5258	0.999197	10933	3	-4.0226	0.075432	0.075675	0.927685	1641	0	-4.0226
Mcu	6	0.52825	0.75241	0.999904	15983	3	-4.2948	0.075432	0.075675	0.927685	1642	0	-4.2948
Fnip2	6	0.13118	0.33502	0.987001	6814	3	-4.8929	0.075432	0.075675	0.927685	1643	0	-4.8929
Tmem206	6	0.13821	0.34569	0.98953	7078	3	-4.0284	0.075432	0.075675	0.927685	1644	0	-4.0284
Cyp2c66	6	0.4951	0.72821	0.999904	15506	2	-3.7141	0.075432	0.075675	0.927685	1645	0	-3.7141
Bcl7a	6	0.1424	0.35199	0.989893	7219	2	-3.404	0.075432	0.075675	0.927685	1646	0	-3.404
Nkx2-4	6	0.36582	0.63327	0.999904	13101	3	-4.6838	0.075432	0.075675	0.927685	1647	0	-4.6838
Tnfrsf21	6	0.056054	0.1782	0.955335	3623	3	-3.408	0.075432	0.075675	0.927685	1648	0	-3.408
Gad2	6	0.49212	0.72598	0.999904	15458	2	-2.6459	0.075432	0.075675	0.927685	1649	0	-2.6459
R3hdm2	6	0.01005	0.045171	0.873275	872	3	-4.893	0.075432	0.075675	0.927685	1650	0	-4.893
Mpl	6	0.0095353	0.04304	0.873275	836	5	-5.4121	0.075432	0.075675	0.927685	1651	0	-5.4121
Tnp1	6	0.16287	0.38217	0.992186	7912	4	-5.0614	0.075432	0.075675	0.927685	1652	0	-5.0614
Tekt1	6	0.29565	0.55921	0.999904	11600	3	-4.0068	0.075432	0.075675	0.927685	1653	0	-4.0068
Il12rb2	6	0.44273	0.69006	0.999904	14573	2	-3.8451	0.075432	0.075675	0.927685	1654	0	-3.8451
Olfr1484	6	0.59612	0.80107	0.999904	16980	2	-4.0229	0.075432	0.075675	0.927685	1655	0	-4.0229
Ckb	6	0.31899	0.58763	0.999904	12145	4	-4.9	0.075432	0.075675	0.927685	1656	0	-4.9
Wnk1	6	0.97985	0.98042	0.999904	21983	1	-1.5662	0.075432	0.075675	0.927685	1657	0	-1.5662
Lingo1	6	0.30703	0.57317	0.999904	11858	3	-4.7327	0.075432	0.075675	0.927685	1658	0	-4.7327
Il1r1	6	0.14788	0.36006	0.991654	7418	3	-4.9609	0.075432	0.075675	0.927685	1659	0	-4.9609
1700022I11Rik	6	0.84571	0.92406	0.999904	20137	2	-2.7116	0.075432	0.075675	0.927685	1660	0	-2.7116
Vps11	6	0.62017	0.8181	0.999904	17337	2	-3.2562	0.075432	0.075675	0.927685	1661	0	-3.2562
Phf1	6	0.85135	0.927	0.999904	20202	2	-3.7244	0.075432	0.075675	0.927685	1662	0	-3.7244
Ccl11	6	0.080447	0.23677	0.971523	4773	4	-5.2707	0.075432	0.075675	0.927685	1663	0	-5.2707
4930558K02Rik	6	0.8478	0.92517	0.999904	20156	2	-3.0788	0.075432	0.075675	0.927685	1664	0	-3.0788
Paics	6	0.88685	0.94633	0.999904	20602	2	-4.1508	0.075432	0.075675	0.927685	1665	0	-4.1508
Prkra	6	0.83542	0.91894	0.999904	20015	2	-3.2839	0.075432	0.075675	0.927685	1666	0	-3.2839
Cntn4	6	0.58703	0.7945	0.999904	16840	3	-4.4674	0.075432	0.075675	0.927685	1667	0	-4.4674
Celf6	6	0.4055	0.66267	0.999904	13870	1	-2.0614	0.075432	0.075675	0.927685	1668	0	-2.0614
Snrnp27	6	0.28872	0.55056	0.999904	11423	4	-4.8482	0.075432	0.075675	0.927685	1669	0	-4.8482
Serpinb11	6	0.50311	0.73411	0.999904	15649	2	-3.9782	0.075432	0.075675	0.927685	1670	0	-3.9782
Nptx1	6	0.38965	0.65106	0.999904	13547	2	-4.1519	0.075432	0.075675	0.927685	1671	0	-4.1519
Olfr533	6	0.49519	0.72828	0.999904	15510	3	-3.7701	0.075432	0.075675	0.927685	1672	0	-3.7701
Tctn3	6	0.15894	0.3764	0.991758	7784	1	-3.2318	0.075432	0.075675	0.927685	1673	0	-3.2318
Gnpat	6	0.072931	0.21924	0.967265	4450	4	-5.1394	0.075432	0.075675	0.927685	1674	0	-5.1394
Arhgef18	6	0.9436	0.96206	0.999904	21321	1	-2.3301	0.075432	0.075675	0.927685	1675	0	-2.3301
Zfp459	6	0.95562	0.96656	0.999904	21518	1	-3.286	0.075432	0.075675	0.927685	1676	0	-3.286
Prl7c1	6	0.012405	0.054653	0.897733	1064	5	-5.6111	0.075432	0.075675	0.927685	1677	0	-5.6111
Gpr139	6	0.30027	0.56488	0.999904	11706	4	-4.8628	0.075432	0.075675	0.927685	1678	0	-4.8628
Cog5	6	0.78638	0.89588	0.999904	19419	2	-3.041	0.075432	0.075675	0.927685	1679	0	-3.041
Tubb3	6	0.62848	0.82389	0.999904	17455	1	-3.5814	0.075432	0.075675	0.927685	1680	0	-3.5814
Zc3h6	6	0.39376	0.65408	0.999904	13639	2	-3.6461	0.075432	0.075675	0.927685	1681	0	-3.6461
Upk1a	6	0.18553	0.41448	0.994281	8660	4	-5.0091	0.075432	0.075675	0.927685	1682	0	-5.0091
Arxes1	6	0.073884	0.22147	0.967265	4478	4	-5.5059	0.075432	0.075675	0.927685	1683	0	-5.5059
Atxn1l	6	0.17975	0.40636	0.994281	8473	3	-4.2372	0.075432	0.075675	0.927685	1684	0	-4.2372
BC029214	6	0.3068	0.57287	0.999904	11853	2	-3.7049	0.075432	0.075675	0.927685	1685	0	-3.7049
Ppapdc3	6	0.43399	0.68359	0.999904	14399	2	-3.343	0.075432	0.075675	0.927685	1686	0	-3.343
Rhot1	6	0.82965	0.91603	0.999904	19950	2	-2.4076	0.075432	0.075675	0.927685	1687	0	-2.4076
Agbl2	6	0.11418	0.30887	0.984117	6189	4	-5.2733	0.075432	0.075675	0.927685	1688	0	-5.2733
Tctex1d4	6	0.87542	0.9399	0.999904	20454	2	-3.8759	0.075432	0.075675	0.927685	1689	0	-3.8759
Iqcf3	6	0.81168	0.90742	0.999904	19754	2	-3.4573	0.075432	0.075675	0.927685	1690	0	-3.4573
Folr2	6	0.49645	0.72921	0.999904	15533	3	-4.7141	0.075432	0.075675	0.927685	1691	0	-4.7141
Cyth3	6	0.3919	0.6527	0.999904	13593	3	-3.6681	0.075432	0.075675	0.927685	1692	0	-3.6681
Arpc5	6	0.046608	0.1539	0.950325	3156	3	-4.521	0.075432	0.075675	0.927685	1693	0	-4.521
Olfr1449	6	0.19587	0.42892	0.996612	8951	4	-4.9448	0.075432	0.075675	0.927685	1694	0	-4.9448
Fam169a	6	0.25942	0.51363	0.999197	10677	2	-4.399	0.075432	0.075675	0.927685	1695	0	-4.399
1700040L02Rik	6	0.08222	0.24094	0.974059	4858	4	-5.333	0.075432	0.075675	0.927685	1696	0	-5.333
Olfr1248	6	0.0098236	0.044233	0.873275	856	4	-5.9875	0.075432	0.075675	0.927685	1697	0	-5.9875
Crk	6	0.82876	0.91563	0.999904	19938	1	-3.8399	0.075432	0.075675	0.927685	1698	0	-3.8399
Slc35a5	6	0.58816	0.79534	0.999904	16863	3	-4.2564	0.075432	0.075675	0.927685	1699	0	-4.2564
Plekhg3	6	0.040677	0.13836	0.943182	2845	4	-4.904	0.075432	0.075675	0.927685	1700	0	-4.904
Agxt	6	0.59361	0.79927	0.999904	16932	2	-4.4373	0.075432	0.075675	0.927685	1701	0	-4.4373
Gclm	6	0.027985	0.10345	0.927535	2104	4	-5.764	0.075432	0.075675	0.927685	1702	0	-5.764
Tmem209	6	0.63909	0.83136	0.999904	17619	2	-4.3712	0.075432	0.075675	0.927685	1703	0	-4.3712
Adam5	6	0.32146	0.59058	0.999904	12199	3	-4.525	0.075432	0.075675	0.927685	1704	0	-4.525
Ceacam13	6	0.41201	0.66747	0.999904	13987	3	-4.0062	0.075432	0.075675	0.927685	1705	0	-4.0062
Hnrnpul2	6	0.52165	0.74763	0.999904	15897	3	-4.6086	0.075432	0.075675	0.927685	1706	0	-4.6086
Rpusd3	6	0.61066	0.81138	0.999904	17195	3	-4.4305	0.075432	0.075675	0.927685	1707	0	-4.4305
Cbx5	6	0.20224	0.43777	0.996612	9119	4	-4.9485	0.075432	0.075675	0.927685	1708	0	-4.9485
Ky	6	0.18889	0.41914	0.994618	8772	4	-4.9414	0.075432	0.075675	0.927685	1709	0	-4.9414
Smad5	6	0.63399	0.8278	0.999904	17540	2	-3.8551	0.075432	0.075675	0.927685	1710	0	-3.8551
Csf1r	6	0.98098	0.98135	0.999904	22007	1	-3.6382	0.075432	0.075675	0.927685	1711	0	-3.6382
Usp37	6	0.65356	0.84151	0.999904	17831	2	-4.0448	0.075432	0.075675	0.927685	1712	0	-4.0448
Flii	6	0.054882	0.17522	0.954222	3565	4	-5.6268	0.075432	0.075675	0.927685	1713	0	-5.6268
Edaradd	6	0.081405	0.23904	0.971523	4822	5	-4.8523	0.075432	0.075675	0.927685	1714	0	-4.8523
Olfr1062	6	0.90617	0.9518	0.999904	20819	1	-2.7659	0.075432	0.075675	0.927685	1715	0	-2.7659
Acot9	6	0.024686	0.094091	0.920454	1871	2	-3.6837	0.075432	0.075675	0.927685	1716	0	-3.6837
Senp8	6	0.79791	0.90104	0.999904	19562	2	-4.3027	0.075432	0.075675	0.927685	1717	0	-4.3027
Ago1	6	0.062588	0.19443	0.9587	3967	4	-5.3611	0.075432	0.075675	0.927685	1718	0	-5.3611
Pan2	6	0.27139	0.52882	0.999795	10993	4	-4.7147	0.075432	0.075675	0.927685	1719	0	-4.7147
Cab39l	6	0.39515	0.65509	0.999904	13664	3	-4.5319	0.075432	0.075675	0.927685	1720	0	-4.5319
Spsb3	6	0.39606	0.65575	0.999904	13685	3	-3.9719	0.075432	0.075675	0.927685	1721	0	-3.9719
Dhdh	6	0.037522	0.12983	0.932052	2663	1	-2.7242	0.075432	0.075675	0.927685	1722	0	-2.7242
Hipk4	6	0.62483	0.82136	0.999904	17408	2	-3.9849	0.075432	0.075675	0.927685	1723	0	-3.9849
Tssk5	6	0.063903	0.19762	0.959445	4024	5	-5.3018	0.075432	0.075675	0.927685	1724	0	-5.3018
Gpr84	6	0.71203	0.86469	0.999904	18524	2	-2.2313	0.075432	0.075675	0.927685	1725	0	-2.2313
Rpl38	6	0.99413	0.99416	0.999904	22331	0	-3.0402	0.075432	0.075675	0.927685	1726	0	-3.0402
Psmb9	6	0.03868	0.13297	0.934161	2734	5	-5.4416	0.075432	0.075675	0.927685	1727	0	-5.4416
Crybb1	6	0.80411	0.90384	0.999904	19648	2	-4.2688	0.075432	0.075675	0.927685	1728	0	-4.2688
Dspp	6	0.58372	0.79212	0.999904	16793	2	-2.6715	0.075432	0.075675	0.927685	1729	0	-2.6715
Gm7073	6	0.50723	0.73715	0.999904	15700	2	-4.1151	0.075432	0.075675	0.927685	1730	0	-4.1151
Nfe2	6	0.56173	0.77632	0.999904	16483	2	-2.4275	0.075432	0.075675	0.927685	1731	0	-2.4275
Olfr420	6	0.40817	0.66465	0.999904	13918	2	-3.7495	0.075432	0.075675	0.927685	1732	0	-3.7495
Tomm20	6	0.93984	0.96079	0.999904	21268	1	-3.5404	0.075432	0.075675	0.927685	1733	0	-3.5404
Fscn1	6	0.76934	0.88839	0.999904	19202	2	-2.1131	0.075432	0.075675	0.927685	1734	0	-2.1131
Ndnf	6	0.016532	0.069888	0.906307	1357	4	-5.8899	0.075432	0.075675	0.927685	1735	0	-5.8899
Mrps30	6	0.16684	0.38796	0.992263	8036	1	-2.9288	0.075432	0.075675	0.927685	1736	0	-2.9288
C1qtnf4	6	0.41257	0.66791	0.999904	13997	1	-3.1456	0.075432	0.075675	0.927685	1737	0	-3.1456
Cdc42	6	0.90382	0.95126	0.999904	20796	1	-3.207	0.075432	0.075675	0.927685	1738	0	-3.207
Olfr1153	6	0.017234	0.07198	0.906307	1404	2	-3.8613	0.075432	0.075675	0.927685	1739	0	-3.8613
Mkrn2	6	0.65579	0.84299	0.999904	17863	2	-4.2525	0.075432	0.075675	0.927685	1740	0	-4.2525
Vmn2r23	6	0.16684	0.38796	0.992263	8038	4	-4.907	0.075432	0.075675	0.927685	1741	0	-4.907
Cpa4	6	0.34798	0.61993	0.999904	12749	2	-2.2638	0.075432	0.075675	0.927685	1742	0	-2.2638
Gcsam	6	0.64568	0.836	0.999904	17710	2	-3.4052	0.075432	0.075675	0.927685	1743	0	-3.4052
Dis3l	6	0.77422	0.89048	0.999904	19270	2	-3.6196	0.075432	0.075675	0.927685	1744	0	-3.6196
Kcnh6	6	0.099327	0.27961	0.980763	5563	3	-4.7751	0.075432	0.075675	0.927685	1745	0	-4.7751
Gpr19	6	0.017403	0.072471	0.906307	1413	4	-5.6995	0.075432	0.075675	0.927685	1746	0	-5.6995
Pabpc4l	6	0.21538	0.45569	0.997696	9476	2	-3.6908	0.075432	0.075675	0.927685	1747	0	-3.6908
Kynu	6	0.11516	0.31034	0.984117	6227	2	-3.1168	0.075432	0.075675	0.927685	1748	0	-3.1168
Ros1	6	0.30705	0.5732	0.999904	11860	4	-4.8992	0.075432	0.075675	0.927685	1749	0	-4.8992
F13a1	6	0.53108	0.7545	0.999904	16025	3	-4.5005	0.075432	0.075675	0.927685	1750	0	-4.5005
Cd200r1	6	0.09116	0.26132	0.980763	5228	4	-5.3723	0.075432	0.075675	0.927685	1751	0	-5.3723
Prss34	6	0.012163	0.053673	0.897114	1039	3	-3.6284	0.075432	0.075675	0.927685	1752	0	-3.6284
Pnliprp2	6	0.026646	0.099615	0.922993	2014	3	-4.4265	0.075432	0.075675	0.927685	1753	0	-4.4265
Ifi203	6	0.18805	0.41799	0.994281	8751	4	-4.9606	0.075432	0.075675	0.927685	1754	0	-4.9606
Gypc	6	0.1663	0.38721	0.992263	8016	4	-5.0144	0.075432	0.075675	0.927685	1755	0	-5.0144
Olfr568	6	0.16153	0.38023	0.991903	7863	3	-4.5344	0.075432	0.075675	0.927685	1756	0	-4.5344
Olfr520	6	0.016977	0.071202	0.906307	1388	4	-5.8067	0.075432	0.075675	0.927685	1757	0	-5.8067
Olfr908	6	0.02784	0.10304	0.925301	2096	4	-5.6714	0.075432	0.075675	0.927685	1758	0	-5.6714
BC030476	6	0.48196	0.71865	0.999904	15280	2	-4.2887	0.075432	0.075675	0.927685	1759	0	-4.2887
BC049715	6	0.65395	0.84177	0.999904	17836	3	-4.3199	0.075432	0.075675	0.927685	1760	0	-4.3199
Top3a	6	0.22639	0.47043	0.997935	9782	4	-4.9071	0.075432	0.075675	0.927685	1761	0	-4.9071
Tmem223	6	0.5408	0.76144	0.999904	16181	2	-4.4375	0.075432	0.075675	0.927685	1762	0	-4.4375
Ints10	6	0.049123	0.16043	0.950767	3279	4	-5.3334	0.075432	0.075675	0.927685	1763	0	-5.3334
Lrriq1	6	0.024619	0.093898	0.920454	1864	2	-4.1481	0.075432	0.075675	0.927685	1764	0	-4.1481
Hspb3	6	0.030527	0.11063	0.930147	2261	4	-5.6511	0.075432	0.075675	0.927685	1765	0	-5.6511
Ccdc116	6	0.11184	0.30524	0.984117	6090	3	-4.4811	0.075432	0.075675	0.927685	1766	0	-4.4811
Srp54a	6	0.033807	0.11971	0.931052	2447	3	-4.9524	0.075432	0.075675	0.927685	1767	0	-4.9524
Srgap1	6	0.51008	0.73924	0.999904	15741	3	-4.6569	0.075432	0.075675	0.927685	1768	0	-4.6569
Poc1a	6	0.9946	0.99463	0.999904	22340	0	-2.4458	0.075432	0.075675	0.927685	1769	0	-2.4458
Nudt8	6	0.20297	0.43876	0.996612	9137	2	-3.3762	0.075432	0.075675	0.927685	1770	0	-3.3762
B2m	6	0.3668	0.634	0.999904	13126	3	-4.1335	0.075432	0.075675	0.927685	1771	0	-4.1335
Cldn13	6	0.1343	0.3397	0.987696	6949	4	-5.2328	0.075432	0.075675	0.927685	1772	0	-5.2328
Bloc1s2	6	0.018045	0.074401	0.909843	1455	3	-4.0851	0.075432	0.075675	0.927685	1773	0	-4.0851
Osbpl6	6	0.63783	0.83048	0.999904	17596	3	-4.5259	0.075432	0.075675	0.927685	1774	0	-4.5259
Rpusd1	6	0.20066	0.43558	0.996612	9064	4	-5.0719	0.075432	0.075675	0.927685	1775	0	-5.0719
Numbl	6	0.57744	0.78758	0.999904	16700	3	-4.5846	0.075432	0.075675	0.927685	1776	0	-4.5846
Casp2	6	0.13191	0.33612	0.987001	6850	3	-4.8579	0.075432	0.075675	0.927685	1777	0	-4.8579
Spag6	6	0.96838	0.9727	0.999904	21742	1	-3.9417	0.075432	0.075675	0.927685	1778	0	-3.9417
Itsn2	6	0.77352	0.89019	0.999904	19258	1	-3.7945	0.075432	0.075675	0.927685	1779	0	-3.7945
C2cd4a	6	0.25745	0.51105	0.999197	10630	2	-2.9869	0.075432	0.075675	0.927685	1780	0	-2.9869
Endov	6	0.9989	0.9989	0.999942	22437	0	-3.2168	0.075432	0.075675	0.927685	1781	0	-3.2168
Maz	6	0.28208	0.54221	0.999904	11250	4	-4.7785	0.075432	0.075675	0.927685	1782	0	-4.7785
Mybbp1a	6	0.31844	0.58697	0.999904	12131	3	-4.6548	0.075432	0.075675	0.927685	1783	0	-4.6548
Ulk1	6	0.19306	0.42497	0.996612	8872	4	-4.9195	0.075432	0.075675	0.927685	1784	0	-4.9195
mmu-mir-3473f	2	0.98833	0.98837	0.999904	22181	0	-1.3482	0.076318	0.076276	0.927685	1785	0	-1.3482
mmu-mir-3074-2	2	0.93228	0.9323	0.999904	21153	0	-2.02	0.076318	0.076276	0.927685	1786	0	-2.02
mmu-mir-692-1	2	0.37513	0.45944	0.997696	13296	1	-3.1237	0.076318	0.076276	0.927685	1787	0	-3.1237
Ppp1r10	2	0.38681	0.46683	0.997935	13503	1	-3.1073	0.076318	0.076276	0.927685	1788	0	-3.1073
mmu-mir-434	3	0.89205	0.89219	0.999904	20664	0	-3.2706	0.076705	0.076639	0.927685	1789	0	-3.2706
Pcdh15	3	0.23731	0.38739	0.992263	10080	1	-4.3754	0.076705	0.076639	0.927685	1790	0	-4.3754
Daam1	3	0.32934	0.48328	0.999197	12367	1	-3.3137	0.076705	0.076639	0.927685	1791	0	-3.3137
mmu-mir-706	3	0.88607	0.88625	0.999904	20589	0	-1.1655	0.076705	0.076639	0.927685	1792	0	-1.1655
mmu-mir-7029	3	0.98989	0.99004	0.999904	22220	0	-2.4135	0.076705	0.076639	0.927685	1793	0	-2.4135
Klf12	3	0.92131	0.92139	0.999904	20986	0	-3.5832	0.076705	0.076639	0.927685	1794	0	-3.5832
Rab11fip5	3	0.2111	0.35983	0.991654	9365	2	-5.3225	0.076705	0.076639	0.927685	1795	0	-5.3225
mmu-mir-3963	3	0.16323	0.30859	0.984117	7923	2	-5.1413	0.076705	0.076639	0.927685	1796	0	-5.1413
mmu-mir-7049	3	0.98717	0.98734	0.999904	22150	0	-2.7481	0.076705	0.076639	0.927685	1797	0	-2.7481
mmu-mir-346	3	0.77636	0.79479	0.999904	19293	1	-4.0398	0.076705	0.076639	0.927685	1798	0	-4.0398
Stx11	3	0.24307	0.39347	0.994281	10246	1	-3.0017	0.076705	0.076639	0.927685	1799	0	-3.0017
Rpl37a	3	0.93143	0.93154	0.999904	21139	0	-0.97586	0.076705	0.076639	0.927685	1800	0	-0.97586
mmu-mir-125b-1	3	0.74892	0.77697	0.999904	18970	1	-3.1682	0.076705	0.076639	0.927685	1801	0	-3.1682
mmu-mir-7093	3	0.85995	0.86053	0.999904	20279	1	-2.8057	0.076705	0.076639	0.927685	1802	0	-2.8057
Ssx9	3	0.81481	0.82236	0.999904	19792	1	-4.028	0.076705	0.076639	0.927685	1803	0	-4.028
mmu-mir-6419	3	0.58889	0.69228	0.999904	16874	1	-4.028	0.076705	0.076639	0.927685	1804	0	-4.028
mmu-mir-3100	3	0.46967	0.6247	0.999904	15056	1	-2.9629	0.076705	0.076639	0.927685	1805	0	-2.9629
Copa	3	0.079178	0.18028	0.955716	4719	1	-0.69412	0.076705	0.076639	0.927685	1806	0	-0.69412
Rpl18	3	0.93958	0.93977	0.999904	21264	0	-4.0285	0.076705	0.076639	0.927685	1807	0	-4.0285
Gm5941	3	0.32801	0.48197	0.999197	12340	1	-1.1608	0.076705	0.076639	0.927685	1808	0	-1.1608
mmu-mir-710	3	0.36251	0.51722	0.999197	13031	2	-4.7351	0.076705	0.076639	0.927685	1809	0	-4.7351
Psmb5	3	0.03616	0.089098	0.920454	2584	2	-5.2836	0.076705	0.076639	0.927685	1810	0	-5.2836
2510009E07Rik	3	0.92966	0.92982	0.999904	21114	0	-3.9186	0.076705	0.076639	0.927685	1811	0	-3.9186
mmu-mir-711	3	0.96648	0.96664	0.999904	21714	0	-2.937	0.076705	0.076639	0.927685	1812	0	-2.937
mmu-mir-6358	3	0.026301	0.066579	0.906307	1993	1	-3.9698	0.076705	0.076639	0.927685	1813	0	-3.9698
Il13	3	0.1657	0.31127	0.984117	7995	1	-4.5767	0.076705	0.076639	0.927685	1814	0	-4.5767
mmu-mir-6965	3	0.75343	0.77976	0.999904	19012	1	-2.8057	0.076705	0.076639	0.927685	1815	0	-2.8057
Tcl1b1	3	0.043105	0.10476	0.927535	2965	2	-6.0507	0.076705	0.076639	0.927685	1816	0	-6.0507
mmu-mir-328	3	0.9923	0.99241	0.999904	22278	0	-2.5712	0.076705	0.076639	0.927685	1817	0	-2.5712
Gm20604	1	0.92286	0.9232	0.999904	21008	0	-1.5128	0.077143	0.077106	0.927685	1818	0	-1.5128
mmu-mir-6996	2	0.48823	0.53473	0.999904	15396	1	-3.0307	0.08014	0.080031	0.927685	1819	0	-3.0307
mmu-mir-203	2	0.39533	0.47224	0.998472	13672	1	-3.1528	0.08014	0.080031	0.927685	1820	0	-3.1528
mmu-mir-7001	2	0.36776	0.45482	0.997696	13149	1	-3.1883	0.08014	0.080031	0.927685	1821	0	-3.1883
Tarm1	2	0.82061	0.82039	0.999904	19854	0	-2.4796	0.08014	0.080031	0.927685	1822	0	-2.4796
mmu-mir-6236	2	0.59021	0.61001	0.999904	16895	1	-2.892	0.08014	0.080031	0.927685	1823	0	-2.892
Gm1979	2	0.2221	0.3467	0.98953	9668	1	-3.3931	0.08014	0.080031	0.927685	1824	0	-3.3931
mmu-mir-8109	2	0.75411	0.75401	0.999904	19021	0	-2.6282	0.08014	0.080031	0.927685	1825	0	-2.6282
mmu-mir-295	1	0.91939	0.9198	0.999904	20958	0	-1.5797	0.080608	0.080578	0.927685	1826	0	-1.5797
mmu-mir-5615-2	1	0.91939	0.9198	0.999904	20959	0	-1.5797	0.080608	0.080578	0.927685	1827	0	-1.5797
Ncbp1	4	0.17021	0.3427	0.989156	8156	3	-5.1389	0.081619	0.081532	0.927685	1828	0	-5.1389
Srp9	4	0.71162	0.82115	0.999904	18517	1	-2.4078	0.081619	0.081532	0.927685	1829	0	-2.4078
Fam109a	4	0.24017	0.44032	0.996612	10157	1	-3.6925	0.081619	0.081532	0.927685	1830	0	-3.6925
Gnptab	4	0.29222	0.50836	0.999197	11512	2	-3.2868	0.081619	0.081532	0.927685	1831	0	-3.2868
Pclo	4	0.076731	0.19902	0.959445	4607	1	-3.3691	0.081619	0.081532	0.927685	1832	0	-3.3691
Mex3c	4	0.72811	0.82648	0.999904	18706	1	-3.7777	0.081619	0.081532	0.927685	1833	0	-3.7777
mmu-mir-3099	4	0.66016	0.79232	0.999904	17926	2	-4.2408	0.081619	0.081532	0.927685	1834	0	-4.2408
mmu-mir-7671	4	0.42688	0.6161	0.999904	14292	1	-3.998	0.081619	0.081532	0.927685	1835	0	-3.998
Gja8	4	0.51875	0.68388	0.999904	15857	1	-2.1578	0.081619	0.081532	0.927685	1836	0	-2.1578
Tti1	4	0.19364	0.37618	0.991758	8889	3	-4.9633	0.081619	0.081532	0.927685	1837	0	-4.9633
Card10	4	0.052109	0.14999	0.947443	3422	3	-5.6365	0.081619	0.081532	0.927685	1838	0	-5.6365
mmu-mir-5133	4	0.99747	0.99747	0.999942	22402	0	-2.1246	0.081619	0.081532	0.927685	1839	0	-2.1246
Ifrd2	4	0.92624	0.92693	0.999904	21063	1	-2.4178	0.081619	0.081532	0.927685	1840	0	-2.4178
mmu-mir-3105	4	0.68206	0.80957	0.999904	18180	1	-3.4138	0.081619	0.081532	0.927685	1841	0	-3.4138
Stk39	4	0.025563	0.079632	0.912175	1935	3	-5.854	0.081619	0.081532	0.927685	1842	0	-5.854
Gatm	4	0.15795	0.32482	0.985049	7744	2	-4.8121	0.081619	0.081532	0.927685	1843	0	-4.8121
Skap2	4	0.98232	0.98234	0.999904	22040	0	-2.4996	0.081619	0.081532	0.927685	1844	0	-2.4996
Ehmt2	4	0.89023	0.89966	0.999904	20644	1	-2.9159	0.081619	0.081532	0.927685	1845	0	-2.9159
Fbxl14	4	0.92661	0.92726	0.999904	21069	1	-1.4909	0.081619	0.081532	0.927685	1846	0	-1.4909
Cideb	4	0.30105	0.51949	0.999197	11719	1	-1.092	0.081619	0.081532	0.927685	1847	0	-1.092
Fam111a	4	0.32264	0.54106	0.999904	12224	2	-4.701	0.081619	0.081532	0.927685	1848	0	-4.701
Mterf1a	4	0.98369	0.98374	0.999904	22076	0	-3.5711	0.081619	0.081532	0.927685	1849	0	-3.5711
mmu-mir-199a-1	4	0.60723	0.75123	0.999904	17145	1	-3.6346	0.081619	0.081532	0.927685	1850	0	-3.6346
Ost4	4	0.021549	0.068288	0.906307	1677	3	-5.9008	0.081619	0.081532	0.927685	1851	0	-5.9008
Aasdhppt	4	0.92434	0.92525	0.999904	21028	1	-3.7059	0.081619	0.081532	0.927685	1852	0	-3.7059
mmu-mir-450b	4	0.29373	0.51027	0.999197	11555	3	-4.9129	0.081619	0.081532	0.927685	1853	0	-4.9129
Faah	4	0.2939	0.51047	0.999197	11560	1	-3.2282	0.081619	0.081532	0.927685	1854	0	-3.2282
mmu-mir-3062	4	0.79993	0.8532	0.999904	19592	1	-2.8617	0.081619	0.081532	0.927685	1855	0	-2.8617
Snapc5	4	0.97978	0.97988	0.999904	21979	0	-3.1677	0.081619	0.081532	0.927685	1856	0	-3.1677
Slc17a9	4	0.42047	0.61136	0.999904	14156	2	-4.3013	0.081619	0.081532	0.927685	1857	0	-4.3013
A630007B06Rik	4	0.84327	0.87288	0.999904	20107	1	-4.2984	0.081619	0.081532	0.927685	1858	0	-4.2984
1700049G17Rik	4	0.30726	0.52731	0.999197	11866	1	-3.4806	0.081619	0.081532	0.927685	1859	0	-3.4806
Akt1	4	0.74581	0.83261	0.999904	18939	1	-3.465	0.081619	0.081532	0.927685	1860	0	-3.465
Gatsl3	4	0.71925	0.82362	0.999904	18611	1	-2.3003	0.081619	0.081532	0.927685	1861	0	-2.3003
Tle1	4	0.43698	0.62333	0.999904	14455	2	-2.9574	0.081619	0.081532	0.927685	1862	0	-2.9574
Klhl34	4	0.51766	0.68305	0.999904	15841	2	-4.4982	0.081619	0.081532	0.927685	1863	0	-4.4982
Zfp329	4	0.13312	0.28767	0.980763	6898	3	-5.2101	0.081619	0.081532	0.927685	1864	0	-5.2101
Cmtr2	4	0.46693	0.64533	0.999904	15005	2	-3.2461	0.081619	0.081532	0.927685	1865	0	-3.2461
Vat1	4	0.94988	0.94976	0.999904	21425	0	-2.739	0.081619	0.081532	0.927685	1866	0	-2.739
Pvr	4	0.58695	0.7354	0.999904	16838	1	-2.4309	0.081619	0.081532	0.927685	1867	0	-2.4309
Olfr1303	4	0.075537	0.1971	0.959445	4550	1	-2.8	0.081619	0.081532	0.927685	1868	0	-2.8
Eif3j1	4	0.99984	0.99983	0.999942	22465	0	-0.77163	0.081619	0.081532	0.927685	1869	0	-0.77163
Ggn	4	0.033851	0.10254	0.924896	2450	3	-5.5786	0.081619	0.081532	0.927685	1870	0	-5.5786
Has3	4	0.96247	0.96246	0.999904	21643	0	-2.2037	0.081619	0.081532	0.927685	1871	0	-2.2037
Gzma	4	0.33208	0.54779	0.999904	12433	2	-3.6727	0.081619	0.081532	0.927685	1872	0	-3.6727
mmu-mir-669l	4	0.36341	0.57028	0.999904	13056	1	-3.8958	0.081619	0.081532	0.927685	1873	0	-3.8958
mmu-mir-6239	4	0.45664	0.63771	0.999904	14834	2	-2.9009	0.081619	0.081532	0.927685	1874	0	-2.9009
4930453N24Rik	4	0.27752	0.48966	0.999197	11139	2	-4.7912	0.081619	0.081532	0.927685	1875	0	-4.7912
Aldh3a1	4	0.60723	0.75123	0.999904	17146	1	-2.6081	0.081619	0.081532	0.927685	1876	0	-2.6081
Gprc5b	4	0.9431	0.94302	0.999904	21315	0	-4.2439	0.081619	0.081532	0.927685	1877	0	-4.2439
mmu-mir-501	4	0.89919	0.90568	0.999904	20742	1	-3.5117	0.081619	0.081532	0.927685	1878	0	-3.5117
mmu-mir-574	4	0.075561	0.19714	0.959445	4551	2	-4.3915	0.081619	0.081532	0.927685	1879	0	-4.3915
Tcf7	4	0.79295	0.85031	0.999904	19504	1	-3.9847	0.081619	0.081532	0.927685	1880	0	-3.9847
Poc5	4	0.99522	0.99522	0.999904	22359	0	-1.0248	0.081619	0.081532	0.927685	1881	0	-1.0248
mmu-mir-6901	4	0.86482	0.88432	0.999904	20332	1	-3.1552	0.081619	0.081532	0.927685	1882	0	-3.1552
mmu-mir-6956	4	0.88659	0.89726	0.999904	20597	1	-2.5164	0.081619	0.081532	0.927685	1883	0	-2.5164
mmu-mir-455	4	0.82456	0.86396	0.999904	19892	1	-3.5288	0.081619	0.081532	0.927685	1884	0	-3.5288
Snapc1	4	0.36895	0.57431	0.999904	13178	1	-3.0659	0.081619	0.081532	0.927685	1885	0	-3.0659
Pgd	4	0.035374	0.10668	0.929763	2532	2	-4.4268	0.081619	0.081532	0.927685	1886	0	-4.4268
Zbtb40	4	0.71736	0.82301	0.999904	18589	1	-4.4442	0.081619	0.081532	0.927685	1887	0	-4.4442
Slc35f5	4	0.31832	0.53803	0.999904	12128	2	-4.2712	0.081619	0.081532	0.927685	1888	0	-4.2712
mmu-mir-5621	4	0.95597	0.95593	0.999904	21526	0	-1.3675	0.081619	0.081532	0.927685	1889	0	-1.3675
Tmem8c	4	0.87035	0.88749	0.999904	20395	1	-2.4133	0.081619	0.081532	0.927685	1890	0	-2.4133
Zfp407	4	0.51349	0.67989	0.999904	15785	1	-4.3157	0.081619	0.081532	0.927685	1891	0	-4.3157
mmu-mir-540	4	0.77634	0.84379	0.999904	19292	1	-3.5746	0.081619	0.081532	0.927685	1892	0	-3.5746
Aurkc	4	0.25374	0.45854	0.997696	10531	2	-4.4844	0.081619	0.081532	0.927685	1893	0	-4.4844
P2ry6	4	0.059333	0.16774	0.954222	3793	1	-4.5239	0.081619	0.081532	0.927685	1894	0	-4.5239
Asrgl1	4	0.23297	0.43064	0.996612	9951	1	-3.6637	0.081619	0.081532	0.927685	1895	0	-3.6637
Alad	4	0.99297	0.99299	0.999904	22295	0	-3.0336	0.081619	0.081532	0.927685	1896	0	-3.0336
mmu-mir-680-1	4	0.50421	0.67297	0.999904	15662	1	-2.2399	0.081619	0.081532	0.927685	1897	0	-2.2399
Mrpl2	4	0.26234	0.46998	0.997935	10774	2	-4.8012	0.081619	0.081532	0.927685	1898	0	-4.8012
Rps15	4	0.99889	0.99889	0.999942	22436	0	-1.0661	0.081619	0.081532	0.927685	1899	0	-1.0661
Sco2	4	0.78159	0.84585	0.999904	19360	1	-2.71	0.081619	0.081532	0.927685	1900	0	-2.71
Mzb1	4	0.22032	0.41334	0.994281	9618	1	-3.6424	0.081619	0.081532	0.927685	1901	0	-3.6424
Cmtm4	4	0.73735	0.82961	0.999904	18824	1	-2.4289	0.081619	0.081532	0.927685	1902	0	-2.4289
Atp6v1d	4	0.96188	0.96186	0.999904	21636	0	-3.7987	0.081619	0.081532	0.927685	1903	0	-3.7987
mmu-mir-500	4	0.16767	0.339	0.987001	8073	1	-2.258	0.081619	0.081532	0.927685	1904	0	-2.258
Polr1c	4	0.9713	0.9713	0.999904	21798	0	-3.9095	0.081619	0.081532	0.927685	1905	0	-3.9095
mmu-mir-6238	4	0.15734	0.32393	0.985049	7721	3	-5.3201	0.081619	0.081532	0.927685	1906	0	-5.3201
Grhl2	4	0.76297	0.83876	0.999904	19123	1	-3.9432	0.081619	0.081532	0.927685	1907	0	-3.9432
Sox8	4	0.98973	0.98977	0.999904	22214	0	-2.2182	0.081619	0.081532	0.927685	1908	0	-2.2182
Snrnp200	4	0.90917	0.91293	0.999904	20848	1	-3.0018	0.081619	0.081532	0.927685	1909	0	-3.0018
Ebf4	4	0.33973	0.55327	0.999904	12599	1	-3.8401	0.081619	0.081532	0.927685	1910	0	-3.8401
Hmga1	4	0.027509	0.085036	0.919324	2075	2	-4.3153	0.081619	0.081532	0.927685	1911	0	-4.3153
Mettl9	4	0.98614	0.98618	0.999904	22120	0	-1.7341	0.081619	0.081532	0.927685	1912	0	-1.7341
Cdyl2	4	0.90649	0.91091	0.999904	20823	1	-3.7011	0.081619	0.081532	0.927685	1913	0	-3.7011
Trim33	4	0.29509	0.512	0.999197	11591	1	-3.8182	0.081619	0.081532	0.927685	1914	0	-3.8182
mmu-mir-1894	4	0.32313	0.5414	0.999904	12233	2	-4.5648	0.081619	0.081532	0.927685	1915	0	-4.5648
Ccdc172	4	0.51514	0.68113	0.999904	15811	2	-4.4379	0.081619	0.081532	0.927685	1916	0	-4.4379
Emilin2	4	0.25505	0.46025	0.997696	10561	3	-4.9886	0.081619	0.081532	0.927685	1917	0	-4.9886
mmu-mir-7669	4	0.039325	0.1171	0.931052	2768	2	-4.0217	0.081619	0.081532	0.927685	1918	0	-4.0217
mmu-mir-140	4	0.14923	0.31184	0.984117	7454	3	-5.1876	0.081619	0.081532	0.927685	1919	0	-5.1876
Zfp930	4	0.93166	0.9318	0.999904	21146	1	-2.1425	0.081619	0.081532	0.927685	1920	0	-2.1425
Ip6k2	4	0.37408	0.57799	0.999904	13278	2	-4.1713	0.081619	0.081532	0.927685	1921	0	-4.1713
Pde9a	4	0.078155	0.20138	0.960651	4672	2	-4.9602	0.081619	0.081532	0.927685	1922	0	-4.9602
mmu-mir-96	4	0.035329	0.10655	0.929763	2531	2	-4.5846	0.081619	0.081532	0.927685	1923	0	-4.5846
Mmp9	4	0.42342	0.61353	0.999904	14223	1	-2.9785	0.081619	0.081532	0.927685	1924	0	-2.9785
Lrrc32	4	0.31535	0.53595	0.999904	12061	2	-4.406	0.081619	0.081532	0.927685	1925	0	-4.406
1110008F13Rik	4	0.25277	0.45727	0.997696	10509	2	-4.6616	0.081619	0.081532	0.927685	1926	0	-4.6616
Rftn2	4	0.1038	0.24251	0.974059	5768	3	-5.22	0.081619	0.081532	0.927685	1927	0	-5.22
Sult2a7	4	0.21534	0.40661	0.994281	9475	1	-2.7023	0.081619	0.081532	0.927685	1928	0	-2.7023
Git2	4	0.25898	0.46553	0.997696	10666	2	-4.1284	0.081619	0.081532	0.927685	1929	0	-4.1284
Olfr486	4	0.025042	0.078169	0.909843	1900	2	-4.9331	0.081619	0.081532	0.927685	1930	0	-4.9331
mmu-mir-2861	4	0.81763	0.86083	0.999904	19820	1	-3.3028	0.081619	0.081532	0.927685	1931	0	-3.3028
mmu-mir-1900	1	0.9183	0.91872	0.999904	20948	0	-1.5837	0.081695	0.081647	0.927685	1932	0	-1.5837
Vmn1r62	1	0.91765	0.91806	0.999904	20942	0	-1.6086	0.082348	0.082285	0.927685	1933	0	-1.6086
Crhr1	5	0.22518	0.45189	0.997696	9753	3	-4.6811	0.083041	0.083115	0.927685	1934	0	-4.6811
Tpp2	5	0.37005	0.60064	0.999904	13197	1	-4.0398	0.083041	0.083115	0.927685	1935	0	-4.0398
Atp2b4	5	0.93384	0.94366	0.999904	21171	1	-4.0495	0.083041	0.083115	0.927685	1936	0	-4.0495
Dmrtc1c1	5	0.17358	0.38811	0.992263	8277	2	-4.3979	0.083041	0.083115	0.927685	1937	0	-4.3979
Gzmn	5	0.73446	0.85167	0.999904	18793	2	-3.2003	0.083041	0.083115	0.927685	1938	0	-3.2003
Gm10662	5	0.44816	0.67552	0.999904	14663	2	-4.5249	0.083041	0.083115	0.927685	1939	0	-4.5249
Olfr1061	5	0.45414	0.68113	0.999904	14766	2	-4.547	0.083041	0.083115	0.927685	1940	0	-4.547
Gm14137	5	0.065419	0.18577	0.955716	4091	3	-5.3051	0.083041	0.083115	0.927685	1941	0	-5.3051
C130060K24Rik	5	0.7234	0.845	0.999904	18655	1	-2.1986	0.083041	0.083115	0.927685	1942	0	-2.1986
Atp5b	5	0.96598	0.96622	0.999904	21707	1	-3.5701	0.083041	0.083115	0.927685	1943	0	-3.5701
Ltn1	5	0.92513	0.93913	0.999904	21039	1	-3.9233	0.083041	0.083115	0.927685	1944	0	-3.9233
Rassf1	5	0.95013	0.95357	0.999904	21427	1	-1.9186	0.083041	0.083115	0.927685	1945	0	-1.9186
Ehd3	5	0.41494	0.64425	0.999904	14054	3	-4.7475	0.083041	0.083115	0.927685	1946	0	-4.7475
Rbm12b2	5	0.23815	0.46569	0.997696	10103	2	-3.5948	0.083041	0.083115	0.927685	1947	0	-3.5948
Krt9	5	0.73446	0.85167	0.999904	18792	2	-2.2719	0.083041	0.083115	0.927685	1948	0	-2.2719
Tmprss2	5	0.080134	0.21632	0.966362	4762	3	-5.5931	0.083041	0.083115	0.927685	1949	0	-5.5931
Mrps11	5	0.71791	0.84172	0.999904	18594	2	-3.5623	0.083041	0.083115	0.927685	1950	0	-3.5623
Alg11	5	0.78867	0.88583	0.999904	19443	1	-2.0504	0.083041	0.083115	0.927685	1951	0	-2.0504
Tmco1	5	0.50731	0.72713	0.999904	15703	2	-4.4792	0.083041	0.083115	0.927685	1952	0	-4.4792
Ciao1	5	0.05391	0.1612	0.951117	3514	3	-5.7263	0.083041	0.083115	0.927685	1953	0	-5.7263
Snrpb2	5	0.50196	0.72445	0.999904	15634	2	-3.9368	0.083041	0.083115	0.927685	1954	0	-3.9368
Lrrc3	5	0.39694	0.62698	0.999904	13695	3	-4.785	0.083041	0.083115	0.927685	1955	0	-4.785
Cdh4	5	0.086309	0.22886	0.971523	5031	2	-4.2593	0.083041	0.083115	0.927685	1956	0	-4.2593
Adam7	5	0.10942	0.27389	0.980763	6012	4	-5.3619	0.083041	0.083115	0.927685	1957	0	-5.3619
Necap2	5	0.16917	0.38074	0.991903	8120	2	-3.2207	0.083041	0.083115	0.927685	1958	0	-3.2207
Eva1c	5	0.0092278	0.036774	0.868407	807	3	-5.5679	0.083041	0.083115	0.927685	1959	0	-5.5679
Klri1	5	0.32327	0.55403	0.999904	12239	3	-4.6352	0.083041	0.083115	0.927685	1960	0	-4.6352
Syngr2	5	0.47098	0.69678	0.999904	15080	3	-4.6352	0.083041	0.083115	0.927685	1961	0	-4.6352
Upp1	5	0.56698	0.75777	0.999904	16549	2	-4.3326	0.083041	0.083115	0.927685	1962	0	-4.3326
Polr3gl	5	0.24891	0.47713	0.99907	10394	2	-3.6969	0.083041	0.083115	0.927685	1963	0	-3.6969
Mettl18	5	0.042502	0.136	0.940324	2931	3	-5.7969	0.083041	0.083115	0.927685	1964	0	-5.7969
Zfp825	5	0.10111	0.25797	0.980532	5641	1	-4.1412	0.083041	0.083115	0.927685	1965	0	-4.1412
Kri1	5	0.67755	0.81817	0.999904	18129	2	-3.1138	0.083041	0.083115	0.927685	1966	0	-3.1138
Fam189a1	5	0.12997	0.31187	0.984117	6776	3	-4.9862	0.083041	0.083115	0.927685	1967	0	-4.9862
Hsd17b12	5	0.67284	0.81554	0.999904	18086	1	-2.4796	0.083041	0.083115	0.927685	1968	0	-2.4796
Etf1	5	0.98289	0.98298	0.999904	22056	0	-2.7617	0.083041	0.083115	0.927685	1969	0	-2.7617
Wdr52	5	0.097069	0.2501	0.975625	5470	3	-4.9817	0.083041	0.083115	0.927685	1970	0	-4.9817
Cyp2j5	5	0.78135	0.8811	0.999904	19353	2	-3.0322	0.083041	0.083115	0.927685	1971	0	-3.0322
Olfml3	5	0.23047	0.45753	0.997696	9881	2	-3.9271	0.083041	0.083115	0.927685	1972	0	-3.9271
Brd7	5	0.043062	0.13726	0.941927	2956	3	-4.8909	0.083041	0.083115	0.927685	1973	0	-4.8909
Syt2	5	0.020466	0.075919	0.909843	1605	4	-5.4841	0.083041	0.083115	0.927685	1974	0	-5.4841
Tfrc	5	0.33905	0.57	0.999904	12588	3	-4.9026	0.083041	0.083115	0.927685	1975	0	-4.9026
Ipo4	5	0.93857	0.94633	0.999904	21244	1	-3.5832	0.083041	0.083115	0.927685	1976	0	-3.5832
F2r	5	0.16429	0.37242	0.991654	7955	4	-4.6945	0.083041	0.083115	0.927685	1977	0	-4.6945
Pde6a	5	0.37117	0.60175	0.999904	13216	2	-4.0994	0.083041	0.083115	0.927685	1978	0	-4.0994
Mettl8	5	0.23057	0.45763	0.997696	9887	3	-5.1387	0.083041	0.083115	0.927685	1979	0	-5.1387
1700019D03Rik	5	0.01159	0.045297	0.874345	1002	4	-5.6937	0.083041	0.083115	0.927685	1980	0	-5.6937
Ggt6	5	0.94511	0.95026	0.999904	21351	1	-3.833	0.083041	0.083115	0.927685	1981	0	-3.833
Hspa4	5	0.10865	0.27242	0.980763	5976	2	-4.2713	0.083041	0.083115	0.927685	1982	0	-4.2713
Ddx52	5	0.28823	0.51819	0.999197	11410	3	-4.9279	0.083041	0.083115	0.927685	1983	0	-4.9279
Leprel1	5	0.43164	0.6601	0.999904	14366	3	-4.717	0.083041	0.083115	0.927685	1984	0	-4.717
Yrdc	5	0.76542	0.87086	0.999904	19151	2	-2.2417	0.083041	0.083115	0.927685	1985	0	-2.2417
Aqp4	5	0.14932	0.34651	0.98953	7458	3	-4.8789	0.083041	0.083115	0.927685	1986	0	-4.8789
Tspear	5	0.99098	0.99104	0.999904	22245	0	-1.4139	0.083041	0.083115	0.927685	1987	0	-1.4139
Olfr1226	5	0.45901	0.68564	0.999904	14868	3	-4.5952	0.083041	0.083115	0.927685	1988	0	-4.5952
Spaca6	5	0.096551	0.24907	0.975625	5452	3	-5.5236	0.083041	0.083115	0.927685	1989	0	-5.5236
Lmnb2	5	0.24588	0.47389	0.998691	10311	3	-4.8125	0.083041	0.083115	0.927685	1990	0	-4.8125
Rpl13	5	0.50299	0.72496	0.999904	15648	2	-4.0373	0.083041	0.083115	0.927685	1991	0	-4.0373
Galnt14	5	0.3637	0.59443	0.999904	13061	3	-4.607	0.083041	0.083115	0.927685	1992	0	-4.607
Lzts1	5	0.91445	0.93397	0.999904	20903	1	-4.2959	0.083041	0.083115	0.927685	1993	0	-4.2959
Gli1	5	0.080127	0.2163	0.966362	4760	2	-2.4942	0.083041	0.083115	0.927685	1994	0	-2.4942
Mogat1	5	0.068817	0.1929	0.957921	4255	3	-5.3481	0.083041	0.083115	0.927685	1995	0	-5.3481
Snap91	5	0.68069	0.81996	0.999904	18165	1	-3.5361	0.083041	0.083115	0.927685	1996	0	-3.5361
Il27ra	5	0.71362	0.83925	0.999904	18541	2	-4.4293	0.083041	0.083115	0.927685	1997	0	-4.4293
Hoga1	5	0.92513	0.93913	0.999904	21041	1	-2.6937	0.083041	0.083115	0.927685	1998	0	-2.6937
Msx1	5	0.34066	0.57161	0.999904	12624	2	-4.0857	0.083041	0.083115	0.927685	1999	0	-4.0857
[truncated: 20,469 more rows]
